# Supplementary material
Source: publisher figshare collection journal article supplement (https://acs.figshare.com/ndownloader/files/15552089)

**Supporting Information**  
**Re<sub>2</sub>O<sub>7</sub>-Catalyzed Approach to Spirocyclic Ether Formation from Acyclic Precursors:**  
**Observation of Remote Stereoinduction**

Cephas Afeke, Youwei Xie, and Paul E. Floreancig\*

*Department of Chemistry*  
*University of Pittsburgh*  
*Pittsburgh, Pennsylvania 15260*

**Table of Contents**

|                               |     |
|-------------------------------|-----|
| General Information           | S2  |
| Standard Cyclization Protocol | S2  |
| Experimental Protocols        | S3  |
| Spectra                       | S21 |

## General Information

All reactions were performed in dry solvents under argon atmosphere using dried glassware unless otherwise specified. Dichloromethane was distilled over  $\text{CaH}_2$  whereas diethyl ether and tetrahydrofuran solvents were distilled over sodium and benzophenone before use. Flash column chromatography with 60 Å silica gel and reagent grade ethyl acetate, hexanes, diethyl ether or pentanes as eluent was performed to purify all synthetic compounds. Analytical TLC was performed on E. Merck pre-coated (25 mm) silica gel 60 F-254 plates and visualized under UV (254 nm). High resolution and low-resolution mass spectra were collected on a VG 7070 spectrometer. IR spectra were obtained on a PerkinElmer FT-IR UATR spectrometer.  $^1\text{H}$  NMR and  $^{13}\text{C}$  NMR spectra were taken on a Bruker Avance 300 spectrometer at 300 MHz and 75 MHz respectively, a Bruker Avance 400 spectrometer at 400 MHz and 100 MHz, or a Bruker Avance 500 spectrometer at 500 MHz and 125 MHz and a Bruker Avance 600 MHz and 150 MHz as specified. The chemical shifts are reported in parts per million (ppm) on the delta ( $\delta$ ) scale. The solvent peak was used as a reference value, for  $^1\text{H}$  NMR:  $\text{CDCl}_3 = 7.26$  ppm,  $\text{CD}_2\text{Cl}_2 = 5.31$  ppm,  $\text{C}_6\text{D}_6 = 7.16$  ppm, for  $^{13}\text{C}$  NMR:  $\text{CDCl}_3 = 77.2$  ppm. Data are reported as follows: m = multiplet, s = singlet, d = doublet, t = triplet, q = quartet, pent = pentet, dd = doublet of doublets, dt = doublet of triplets, sext = sextet, sept = septet, oct = octet, dq = doublet of quartet, dp = doublet of pentet, ddd = doublet of doublet of doublets, ddt = doublet of doublet of triplets, tt = triplet of triplets, br = broad.

## General Procedure for $\text{Re}_2\text{O}_7$ -catalyzed spirocycle formation

To a solution of substrate (0.1 - 0.2 mmol) in DCM (0.5 – 1.5 mL), stirring at rt (unless otherwise noted), was added  $\text{Re}_2\text{O}_7$  (3-6 mol %). The mixture was stirred until the substrate was consumed. The reaction mixture was quenched with a few drops of pyridine, concentrated *in vacuo* and purified via flash column chromatography with 0 – 10% ethyl acetate in hexanes as eluent in gradient elution.

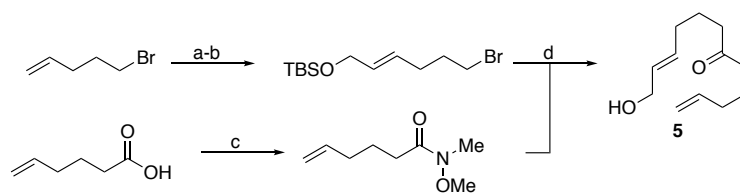

**Reagents and conditions**

a) *cis*-2-Butene-1,4-diol, Grubbs-Hoveyda second generation catalyst, CH<sub>2</sub>Cl<sub>2</sub>, 38%.  
 b) TBSCl, imidazole, DMAP, CH<sub>2</sub>Cl<sub>2</sub>, 89%. c) MeON(Me)·HCl, DCC, Et<sub>3</sub>N, DMAP, CH<sub>2</sub>Cl<sub>2</sub>, 87%. d) *t*BuLi, Et<sub>2</sub>O, -78 °C, then Weinreb amide, then 2N aqueous HCl, 40%.

**Scheme 1.** Preparation of **5**.

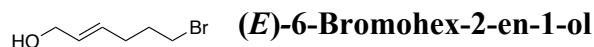

To a solution of *cis*-2-butene-1,4-diol (3.54 g, 40.2 mmol) and 5-bromo-1-pentene (3.0 g, 20.1 mmol) in DCM (10.0 mL), was added Hoveyda-Grubbs II catalyst (40 mg, 0.064 mmol). The reaction was stirred at rt for 16 h. The reaction mixture was concentrated *in vacuo* and purified via flash column chromatography with 40% hexanes in ethyl acetate to yield the desired compound as a brown oil (1.38 g, 38.4%).

<sup>1</sup>H NMR (300 MHz, CDCl<sub>3</sub>): δ 5.60-5.75 (m, 2H), 4.09 (d, *J* = 4.3 Hz, 2H), 3.41 (t, *J* = 6.7 Hz, 2H), 2.18-2.30 (m, 2H), 1.90-1.99 (m, 2H)

<sup>13</sup>C NMR (75 MHz, CDCl<sub>3</sub>): δ 130.7, 130.5, 63.5, 33.1, 32.0, 30.5

HRMS (ESI): *m/z* calcd for C<sub>6</sub>H<sub>10</sub>BrO [M-H]<sup>-</sup> 176.9915, found 176.9816.

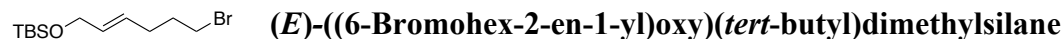

To a solution of the allylic alcohol (1.68 g, 9.38 mmol) and *tert*-butyldimethylsilyl chloride (2.83 g, 18.8 mmol) in DCM (50 mL) was added imidazole (1.92 g, 28.1 mmol) and DMAP (0.12 g, 0.94 mmol). The reaction was stirred at rt for 3 h. The reaction was quenched with water and extracted with DCM, concentrated *in vacuo* and purified via flash column chromatography with 10% ethyl acetate in hexanes to yield 2.46 g (89%) of the product as a colorless oil.

<sup>1</sup>H NMR (300 MHz, CDCl<sub>3</sub>): δ 5.54-5.66 (m, 2H), 4.12 (d, *J* = 1.1 Hz, 2H), 3.40 (t, *J* = 6.7 Hz, 2H), 2.12-2.22 (m, 2H), 1.93 (pent, *J* = 6.8 Hz, 2H), 0.90 (s, 9H), 0.06 (s, 6H)

<sup>13</sup>C NMR (75 MHz, CDCl<sub>3</sub>): δ 130.8, 128.7, 63.7, 33.1, 32.1, 30.5, 26.0, 18.4, -5.1

HRMS (ESI): *m/z* calcd for C<sub>12</sub>H<sub>24</sub>OSiBr [M-H]<sup>-</sup> 291.0780, found 291.0827.

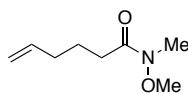

### ***N*-Methoxy-*N*-methylhex-5-enamide**

To a solution of 5-hexenoic acid (1.8 g, 14.1 mmol) in DCM (45 mL) at 0 °C was added *N,O*-dimethylhydroxylamine hydrochloride (1.65 g, 16.9 mmol), DCC (3.48 g, 16.9 mmol), DMAP (0.21 g, 1.69 mmol) and triethylamine (1.71 g, 16.9 mmol). The reaction was stirred until starting material was fully consumed. The reaction mixture was filtered through Celite, washed with 0.5 N HCl and extracted with DCM after which the crude product was purified via flash column chromatography with 20% ethyl acetate in hexanes and concentrated *in vacuo* to yield the product as a pale-yellow oil (2.09 g, 87.3%).

<sup>1</sup>H NMR (300 MHz, CDCl<sub>3</sub>): δ 5.70 (ddt, *J* = 17.1, 10.2, 7.1 Hz, 1H), 4.94 (dd, *J* = 17.2, 1.69 Hz), 4.88 (dd, *J* = 10.2, 1.5 Hz), 3.59 (s, 3H), 3.08 (s, 3H), 2.33 (t, *J* = 7.4 Hz, 2H), 2.02 (dt, *J* = 7.3, 7.0 Hz, 2H), 1.64 (pent, *J* = 7.7 Hz, 2H)

<sup>13</sup>C NMR (75 MHz, CDCl<sub>3</sub>): δ 174.3, 138.0, 114.9, 61.1, 33.2, 32.1, 31.0, 23.6

HRMS (ESI) *m/z* calcd for C<sub>8</sub>H<sub>16</sub>O<sub>2</sub>N [M+H]<sup>+</sup> 158.1181, found 158.1175.

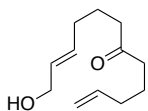

### **(10*E*)-12-Hydroxydodeca-1,10-dien-6-one (5)**

To an oven dried round bottom flask was added the alkyl bromide (1.86 g, 6.4 mmol) and diethyl ether (20 mL), and the solution was stirred at −78 °C. After 1 h of stirring, *tert*-butyllithium solution (1.7 M, 7.50 mL, 12.8 mmol) was added slowly and stirred for 0.25 h after which the Weinreb amide (1.0 g, 6.4 mmol) was added dropwise and stirred for an additional 0.5 h while maintaining the reaction at −78 °C. The reaction mixture was quenched with excess 2N HCl, extracted with diethyl ether, and the crude product purified via chromatography with 20% ethyl acetate in hexanes to yield 0.5 g (40% yield) of the product as a colorless oil.

<sup>1</sup>H NMR (500 MHz, CDCl<sub>3</sub>): δ 5.75 (ddt, *J* = 17.0, 10.2, 6.7 Hz, 1H), 5.60-5.68 (m, 2H), 5.00 (dd, *J* = 17.2, 1.2 Hz, 1H), 4.97 (dd, *J* = 10.2, 1.0 Hz, 1H), 4.08 (d, *J* = 3.1 Hz, 2H), 2.39 (t, *J* = 7.4 Hz, 4H), 2.04 (dt, *J* = 6.8, 6.3 Hz, 4H), 1.66 (pent, *J* = 7.4 Hz, 4H)

<sup>13</sup>C NMR (125 MHz, CDCl<sub>3</sub>): δ 210.8, 138.0, 132.1, 129.8, 115.2, 63.6, 42.0, 41.9, 33.1, 31.6, 23.1, 22.8

HRMS (ESI): *m/z* calcd for C<sub>12</sub>H<sub>21</sub>O<sub>2</sub> [M+H]<sup>+</sup> 197.1536, found 197.1532

IR (thin film): 3408, 3114, 2930, 1708 1410, 1216, 1088, 970, 912 cm<sup>−1</sup>

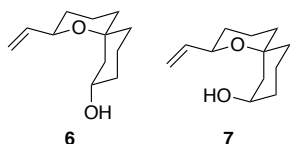

**(2*R*,6*R*,8*R*)-2-Vinyl-1-oxaspiro [5.5]undecan-8-ol (6) and (2*R*,6*R*,8*S*)-2-vinyl-1-oxaspiro[5.5] undecane-8-ol (7)**

The general procedure for spirocycle synthesis was followed with **5** (20.0 mg, 0.1 mmol) and  $\text{Re}_2\text{O}_7$  (3.0 mg, 0.006 mmol) in DCM (1.0 mL) for 25 min at rt after which the crude mixture was purified via flash column chromatography with 10% ethyl acetate in hexanes to give a mixture of **6** and **7** (18.6 mg, 93% yield) with a diastereomeric ratio (d.r.) of 4:1 respectively.

#### Major (slower-eluting) isomer (**6**)

$^1\text{H}$  NMR (400 MHz,  $\text{CDCl}_3$ ):  $\delta$  5.80 (ddd,  $J = 17.2, 10.5, 5.1$  Hz, 1H), 5.20 (dt,  $J = 17.2, 1.6$  Hz, 1H), 5.03, (dt,  $J = 10.5, 1.5$  Hz, 1H), 4.04 (dt,  $J = 11.0, 5.4$  Hz, 1H), 3.74 (tt,  $J = 11.0, 4.2$  Hz, 1H), 2.68 (ddt,  $J = 13.5, 4.0, 2.6$  Hz, 1H), 1.95 (d,  $J = 13.0$  Hz, 1H), 1.71-1.84, (m, 2H), 1.64-1.67 (m, 2H), 1.52-1.58 (m, 2H), 1.36-1.44, (m, 2H), 1.15-1.28 (m, 3H), 0.87 (dd,  $J = 13.2, 10.9$  Hz, 1H)  
 $^{13}\text{C}$  NMR (100 MHz,  $\text{CDCl}_3$ ):  $\delta$  140.1, 114.0, 74.1, 70.1, 67.0, 39.1, 38.3, 36.1, 35.9, 31.4, 19.5, 19.2

HRMS (ESI):  $m/z$  calcd for  $\text{C}_{12}\text{H}_{21}\text{O}_2$   $[\text{M}+\text{H}]^+$  197.1536, found 197.1533

IR (thin film): 3399, 2946, 2861 1458 1265, 1020, 735  $\text{cm}^{-1}$

#### Minor (faster-eluting) isomer (**7**)

$^1\text{H}$  NMR (500 MHz,  $\text{CDCl}_3$ ):  $\delta$  5.79 (ddd,  $J = 17.2, 10.5, 5.8$  Hz, 1H), 5.25 (dt,  $J = 17.2, 1.4$  Hz, 1H), 5.07, (dt,  $J = 10.5, 1.4$  Hz, 1H), 4.22 (ddd,  $J = 12.0, 5.7, 1.0$  Hz, 1H), 3.95 (dp,  $J = 10.3, 3.5$  Hz, 1H), 3.55 (d,  $J = 10.0$  Hz, 1H), 2.48 (d,  $J = 14.0$  Hz, 1H), 1.94-2.02, (m, 1H), 1.75-1.78 (m, 1H), 1.64-1.74 (m, 4H), 1.38-1.45, (m, 4H), 1.22-1.33 (m, 3H)  
 $^{13}\text{C}$  NMR (125 MHz,  $\text{CDCl}_3$ ):  $\delta$  139.3, 115.0, 74.2, 71.6, 67.7, 39.8, 36.4, 33.3, 31.5, 19.4, 19.0, 15.9

HRMS (ESI):  $m/z$  calcd for  $\text{C}_{12}\text{H}_{21}\text{O}_2$   $[\text{M}+\text{H}]^+$  197.1536, found 197.1533

IR (thin film): 3402, 2927, 2872, 1463, 1263, 1077, 703  $\text{cm}^{-1}$

### Mmol Scale Reactions

#### 5 mol% catalyst

The general procedure for spirocycle synthesis was followed with **5** (220 mg, 1.12 mmol) and  $\text{Re}_2\text{O}_7$  (26 mg, 0.056 mmol) in DCM (8.0 mL), except that the reaction was stirred at 0 °C prior to warming to rt and stirring for 25 min. The crude mixture was purified via flash column

chromatography with 10% ethyl acetate in hexanes to give a mixture of **6** and **7** (194 mg, 88% yield) with a diastereomeric ratio (d.r.) of 3.9:1 respectively.

#### *1.7 mol% catalyst*

The general procedure for spirocycle synthesis was followed with **5** (203 mg, 1.03 mmol) and Re<sub>2</sub>O<sub>7</sub> (8 mg, 0.017 mmol) in DCM (6.0 mL), except that the reaction was stirred at 0 °C prior to warming to rt and stirring for 70 min. The crude mixture was purified via flash column chromatography with 10% ethyl acetate in hexanes to give a mixture of **6** and **7** (172 mg, 85% yield) with a diastereomeric ratio (d.r.) of 3.9:1 respectively.

### Reaction Optimization

#### *General procedure for optimization studies.*

The general protocol for spirocycle formation was followed with 10 mg (0.05 mmol) of **5** and catalyst (3 mol%) in 0.5 mL of each solvent listed and stirred at the respective temperature in a sealed 1-dram vial. The reaction mixture was quenched with a drop of pyridine, filtered through a plug of silica in a Fisherbrand 9-inch borosilicate Pasteur pipet column with 20% ethyl acetate in hexanes, and concentrated under reduced pressure to obtain total product yield. The concentrated mixture was then dissolved in CDCl<sub>3</sub> and analyzed with NMR spectroscopy for the diastereomeric ratio.

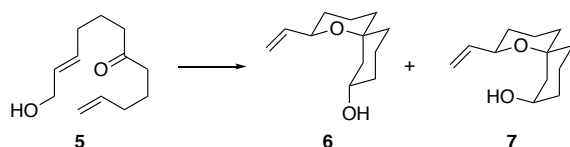

| No | Catalyst                                         | Solvent       | Temp (°C) | Time (h) | Yield (%) | d.r (6:7) |
|----|--------------------------------------------------|---------------|-----------|----------|-----------|-----------|
| 1  | Re <sub>2</sub> O <sub>7</sub> •SiO <sub>2</sub> | DCM           | rt        | 0.25     | 0         | n/a       |
| 2  | Re <sub>2</sub> O <sub>7</sub> •SiO <sub>2</sub> | DCM           | 0         | 1        | 0         | n/a       |
| 3  | Re <sub>2</sub> O <sub>7</sub>                   | DCM           | rt        | 0.4      | 93        | 4:1       |
| 4  | Re <sub>2</sub> O <sub>7</sub>                   | DCM           | rt        | 1.75     | 89        | 2:1       |
| 5  | Re <sub>2</sub> O <sub>7</sub>                   | MeCN          | rt        | 1        | 91        | 4:1       |
| 6  | Re <sub>2</sub> O <sub>7</sub>                   | Hexanes       | rt        | 1.5      | 32        | 4:1       |
| 7  | Re <sub>2</sub> O <sub>7</sub>                   | Nitromethane  | rt        | 2        | 53        | 4:1       |
| 8  | Re <sub>2</sub> O <sub>7</sub>                   | Diethyl ether | rt        | 1        | 0         | n/a       |

|    |                                |               |    |   |   |     |
|----|--------------------------------|---------------|----|---|---|-----|
| 9  | Re <sub>2</sub> O <sub>7</sub> | Water         | rt | 1 | 0 | n/a |
| 10 | Re <sub>2</sub> O <sub>7</sub> | Ethyl acetate | rt | 1 | 0 | n/a |

**Table 1.** Optimization studies for Spirocycle formation.

## Kinetic Studies

### *Procedure for kinetic studies*

To a solution of **5** (10 mg, 0.05 mmol) in CD<sub>2</sub>Cl<sub>2</sub> (0.2 mL) in a Wilmad 5 mm diameter, 7-inch borosilicate NMR tube was added 50  $\mu$ L of 0.25 M solution of 1,4-difluorobenzene [(5.7 mg, 0.05 mmol) in CD<sub>2</sub>Cl<sub>2</sub> (0.2 mL)] as internal standard. <sup>1</sup>H NMR spectrum was obtained on the sample with a Bruker Avance 600 MHz spectrometer at t = 0, after which the sample was removed from the spectrometer, loaded with Re<sub>2</sub>O<sub>7</sub> (2 mg, 0.004 mmol), shaken and inserted back into the spectrometer for analysis after 5 min. The removal of sample from spectrometer, vigorous shaking of the reaction mixture and re-insertion of the sample into the spectrometer and analysis for product yield and d.r. was repeated every 5 min for the first 25 mins and then at 10 min intervals afterwards.

| <u>Time (min)</u> | <u>Yield (%)</u> | <u>d.r</u> |
|-------------------|------------------|------------|
| 5                 | 34               | 11.2       |
| 10                | 45               | 8.7        |
| 15                | 50               | 6.8        |
| 25                | 65               | 4          |
| 35                | 71               | 2.8        |
| 45                | 73               | 2.5        |
| 60                | 81               | 2.4        |
| 90                | 88               | 2.4        |
| 120               | 91               | 2.4        |
| 130               | 94               | 2.3        |

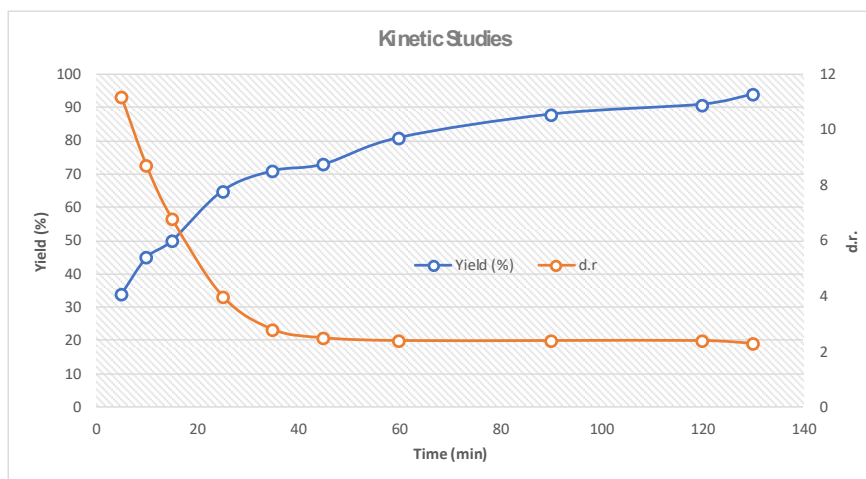

**Table 2.** Kinetic studies in CD<sub>2</sub>Cl<sub>2</sub>.

## Determination of the stereochemistry at the Quaternary Stereocenter

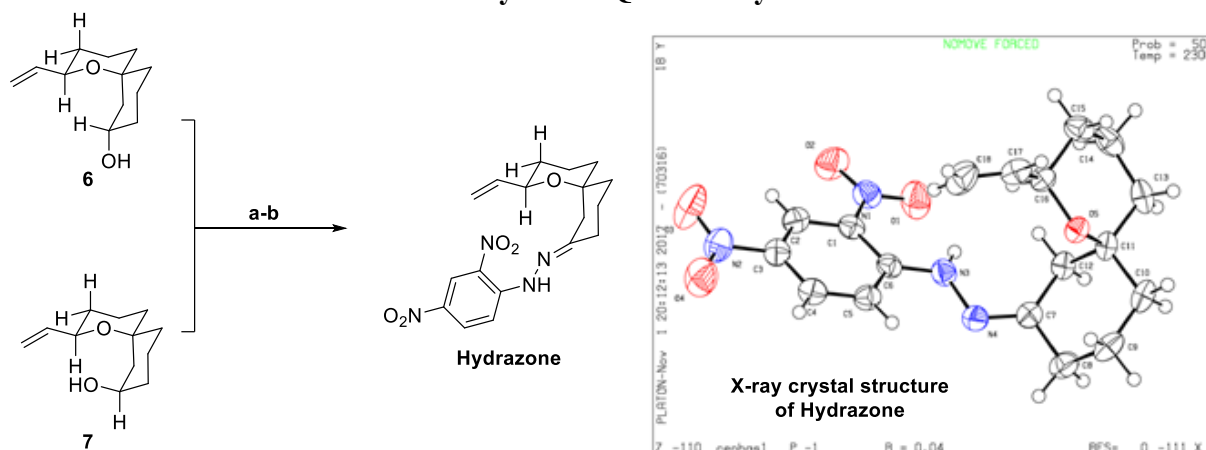

### Reagents and condition

a) PCC, Celite, DCM, rt, 88%(with **6**). b) 2,4-DNPH, MeOH, reflux, 91%.

**Scheme 2.** Derivatization of to the corresponding 2,4-dinitrophenylhydrazone.

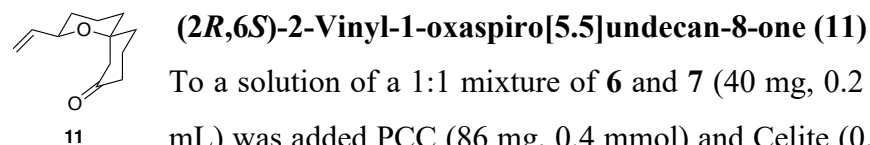

To a solution of a 1:1 mixture of **6** and **7** (40 mg, 0.2 mmol) in dichloromethane (2 mL) was added PCC (86 mg, 0.4 mmol) and Celite (0.1 g). The reaction stirred at rt for 15 min, then the mixture was purified via flash column chromatography with 20% ethyl acetate in hexanes as eluent and the eluted fractions concentrated under reduced pressure to yield a colorless oil (35 mg, 88%) identified by NMR spectroscopy as a single ketone product.

$^1\text{H}$  NMR (500 MHz,  $\text{CDCl}_3$ ):  $\delta$  5.77 (ddd,  $J = 17.5, 10.6, 5.3$  Hz, 1H), 5.17 (dt,  $J = 17.3, 1.6$  Hz, 1H), 5.04 (dt,  $J = 10.6, 1.5$  Hz, 1H), 4.04 (ddt,  $J = 11.2, 2.6, 1.1$  Hz, 1H), 2.96 (dt,  $J = 13.9, 1.6$  Hz, 1H), 2.31-2.38 (m, 2H), 2.25-2.31 (m, 1H), 2.10-2.19 (m, 1H), 1.85-1.89 (m, 1H), 1.75-1.83 (m, 2H), 1.63-1.70 (m, 3H), 1.56-1.59 (m, 1H), 1.39-1.45 (m, 1H), 1.20-1.42 (m, 1H)

$^{13}\text{C}$  NMR (125 MHz,  $\text{CDCl}_3$ ):  $\delta$  210.0, 139.5, 114.6, 70.6, 46.4, 40.9, 38.9, 34.7, 31.1, 29.7, 20.5, 18.9

HRMS (ESI):  $m/z$  calcd for  $\text{C}_{12}\text{H}_{19}\text{O}_2$   $[\text{M}+\text{H}]^+$  195.1380, found 195.1376

IR (thin film): 2933, 2870, 1711, 1440, 1227, 1048, 984, 710  $\text{cm}^{-1}$

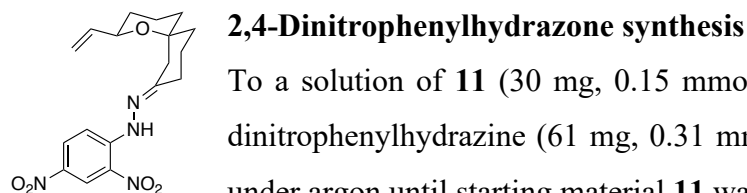

To a solution of **11** (30 mg, 0.15 mmol) in methanol (3 mL) was added 2,4-dinitrophenylhydrazine (61 mg, 0.31 mmol). The mixture was stirred at reflux under argon until starting material **11** was fully consumed. The reaction mixture was concentrated and purified via flash column chromatography with 10% ethyl acetate in hexanes



after which the eluted fractions were concentrated to yield a yellow-orange powdery precipitate (51 mg, 91%). The precipitate was then recrystallized via vapor diffusion by dissolving it in approximately 80  $\mu\text{L}$  of ether in a 1-dram borosilicate glass vial and placing the vial in a larger 4-dram glass vial containing approximately 5 mL of pentane. The bigger vial containing the smaller 1-dram vial was capped tightly and allowed to sit for 96 h at room temperature for the recrystallized hydrazone to form. The regenerated crystals were dried under vacuum and analyzed with X-ray crystallography for the crystal structure of the derived hydrazone.

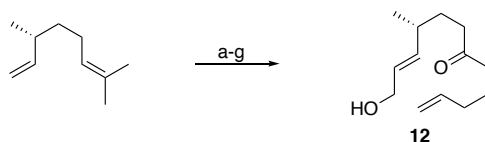

**Reagents and conditions**

a) *m*CPBA,  $\text{CH}_2\text{Cl}_2$ , 0  $^\circ\text{C}$ , 93%. b) *cis*-2-Butene-1,4-diol, Grubbs-Hoveyda second generation catalyst,  $\text{CH}_2\text{Cl}_2$ , 26%. c) TBSCl, imidazole, DMAP,  $\text{CH}_2\text{Cl}_2$ , 88%. d)  $\text{H}_5\text{IO}_6$ ,  $\text{CH}_2\text{Cl}_2$ , 0  $^\circ\text{C}$ , 86%. e) Mg, 5-bromo-1-pentene, THF, 73%. f) PCC, Celite,  $\text{CH}_2\text{Cl}_2$ , 81%. g) HOAc, THF,  $\text{H}_2\text{O}$ , 67%.

**Scheme 3.** Synthesis of **12**.

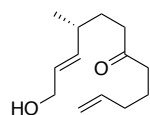

**(9*R*,10*E*)-12-Hydroxy-9-methyldodeca-1,10-dien-6-one (12)**

$^1\text{H}$  NMR (400 MHz,  $\text{CDCl}_3$ ):  $\delta$  5.77 (ddt,  $J$  = 17.0, 10.2, 6.7 Hz, 1H), 5.60 (dt,  $J$  = 15.4, 5.4 Hz, 1H), 5.50 (dd,  $J$  = 15.1, 7.7 Hz, 1H), 4.95-5.03 (m, 2H), 4.09 (t,  $J$  = 4.6 Hz, 2H), 2.39 (t,  $J$  = 7.8 Hz, 2H), 2.37 (t,  $J$  = 7.8 Hz, 2H), 2.12 (sept,  $J$  = 7.0 Hz, 1H), 2.04 (qt,  $J$  = 7.0, 1.6 Hz, 2H), 1.66 (pent,  $J$  = 7.3 Hz, 2H), 1.48-1.59 (m, 2H), 1.32 (t,  $J$  = 5.6 Hz, 1H), 1.00 (d,  $J$  = 6.8 Hz, 3H)

$^{13}\text{C}$  NMR (100 MHz,  $\text{CDCl}_3$ ):  $\delta$  211.1, 138.0, 137.9, 128.1, 115.2, 63.7, 42.0, 40.7, 36.2, 33.1, 30.4, 22.8, 20.5

HRMS (ESI):  $m/z$  calcd for  $\text{C}_{13}\text{H}_{23}\text{O}_2$   $[\text{M}+\text{H}]^+$  211.1693, found 211.1689

IR (thin film): 3406, 3107, 2927, 1709 1454, 1087, 971, 632  $\text{cm}^{-1}$

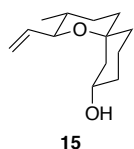

**15**

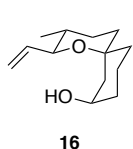

**16**

**(2*S*,3*R*,6*R*,8*S*)-3-Methyl-2-vinyl-1-oxaspiro[5.5]undecan-8-ol (15) and (2*S*,3*R*,6*R*,8*R*)-3-methyl-2-vinyl-1-oxaspiro[5.5]undecan-8-ol (16)**

The general procedure for spirocycle synthesis was followed with **12** (15.0 mg, 0.1 mmol) and  $\text{Re}_2\text{O}_7$  (2.0 mg, 0.004 mmol) in DCM (0.7 mL) for 10 min at 0  $^\circ\text{C}$ . The reaction mixture was purified via flash chromatography (10% ethyl acetate in hexane) and the eluted fractions were

concentrated *in vacuo* to give products **15** and **16** (11.6 mg, 77% yield) with diastereomeric ratio of 4:1 respectively.

**Major (slower-eluting) isomer (15)**

$^1\text{H}$  NMR (500 MHz,  $\text{CDCl}_3$ ):  $\delta$  5.77 (ddd,  $J = 17.2, 10.3, 6.8$  Hz, 1H), 5.22 (d,  $J = 17.1$ , 1H), 5.12 (d,  $J = 10.4$  Hz, 1H), 3.74 (tt,  $J = 10.9, 4.8$  Hz, 1H), 3.58 (dd,  $J = 10.1, 7.0$  Hz, 1H), 2.66 (dd,  $J = 13.2, 1.8$  Hz, 1H), 1.97 (d,  $J = 11.6$  Hz, 1H) 1.72-1.81 (m, 1H), 1.52-1.63 (m, 4H), 1.38-1.50 (m, 3H), 1.24-1.33 (m, 4H), 0.82 (d,  $J = 6.6$  Hz, 3H)

$^{13}\text{C}$  NMR (125 MHz,  $\text{CDCl}_3$ ):  $\delta$  138.6, 116.5, 73.7, 67.1, 39.0, 38.3, 36.7, 36.0, 35.3, 28.1, 22.7, 19.6, 17.8

HRMS (ESI):  $m/z$  calcd for  $\text{C}_{13}\text{H}_{23}\text{O}_2$   $[\text{M}+\text{H}]^+$  211.1698, found 211.1691

IR (thin film): 3343, 2929, 2859, 1451, 1274, 1025, 920  $\text{cm}^{-1}$

**Minor (faster-eluting) isomer (16)**

$^1\text{H}$  NMR (500 MHz,  $\text{CDCl}_3$ ):  $\delta$  5.75 (ddd,  $J = 17.4, 10.3, 7.3$  Hz, 1H), 5.28 (dd,  $J = 17.2, 1.0$  Hz, 1H), 5.16 (dd,  $J = 10.4, 1.2$  Hz, 1H), 3.95 (dp,  $J = 10.4, 3.7$  Hz, 1H), 3.78 (dd,  $J = 9.7, 7.3$  Hz, 1H), 3.53 (d,  $J = 9.0$  Hz, 1H), 2.48 (d,  $J = 14.2$  Hz, 1H), 1.88-2.06 (m, 2H), 1.63-1.78 (m, 2H), 1.41-1.51 (m, 3H), 1.38-1.42 (m, 3H), 1.30-1.37 (m, 2H), 0.83 (d,  $J = 6.4$  Hz, 3H)

$^{13}\text{C}$  NMR (125 MHz,  $\text{CDCl}_3$ ):  $\delta$  137.9, 117.6, 78.6, 73.8, 67.7, 39.7, 37.0, 35.3, 34.0, 33.3, 27.9, 17.7, 16.0

HRMS (ESI):  $m/z$  calcd for  $\text{C}_{13}\text{H}_{23}\text{O}_2$   $[\text{M}+\text{H}]^+$  211.1698, found 211.1692

IR (thin film): 3336, 2925, 2853, 1453, 1025, 920  $\text{cm}^{-1}$

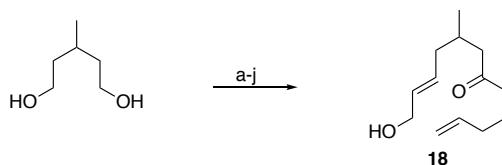

**Reagents and conditions**

a) NaH, THF, then TBSCl, 0 °C, 58%. b)  $\text{SO}_3\cdot\text{Py}$ , DMSO,  $\text{Et}_3\text{N}$ ,  $\text{CH}_2\text{Cl}_2$ , 0 °C, 97%. c) NaH, THF,  $(\text{MeO})_2\text{P}(\text{O})\text{CH}_2\text{C}(\text{O})\text{OMe}$ , 0 °C, 80%. d) DIBAL-H, THF, 0 °C, 98%. e) TBDPSCI, imidazole,  $\text{CH}_2\text{Cl}_2$ , 0 °C, 92%. f) 1N HCl, THF, 55%. g) PCC, Celite,  $\text{CH}_2\text{Cl}_2$ , 83%. h) Mg,  $\text{I}_2$ , pentenyl bromide, THF, 0 °C, 97%. i) PCC, Celite,  $\text{CH}_2\text{Cl}_2$ , 98%. j)  $\text{Bu}_4\text{NF}$ , THF, 91%.

**Scheme 4.** Synthesis of **18**.

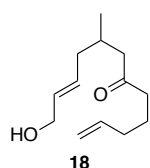

**(E)-12-Hydroxy-8-methyldodeca-1,10-dien-6-one (18)**

$^1\text{H}$  NMR (500 MHz,  $\text{CDCl}_3$ ):  $\delta$  5.76 (ddt,  $J = 17.0, 10.2, 6.7$  Hz, 1H), 5.63 (m, 2H), 5.00 (dq,  $J = 17.2, 1.7$  Hz, 1H), 4.97 (ddt,  $J = 10.3, 2.0, 1.2$  Hz, 1H), 4.09 (d,  $J =$

3.6 Hz, 2H), 2.36-2.41 (m, 3H), 2.20 (dd,  $J = 16.0, 7.8$  Hz, 1H), 2.10 (sept,  $J = 6.7$  Hz, 1H), 2.01-2.07 (m, 2H), 1.92-2.00 (m, 2H), 1.66 (pent,  $J = 7.4$  Hz, 2H), 0.89 (d,  $J = 6.6$  Hz, 3H)  
 $^{13}\text{C}$  NMR (125 MHz,  $\text{CDCl}_3$ ):  $\delta$  210.7, 138.0, 131.1, 130.7, 115.2, 63.6, 49.5, 42.5, 39.5, 33.1, 29.1, 22.7, 19.8

HRMS (ESI):  $m/z$  calcd for  $\text{C}_{13}\text{H}_{22}\text{O}_2\text{Na}$   $[\text{M}+\text{Na}]^+$  233.1512, found 233.1505

IR (thin film): 3413, 2929, 1708, 1371, 912, 736  $\text{cm}^{-1}$

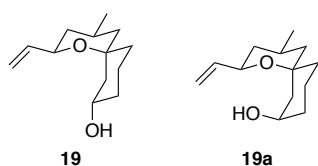

**(2R,4R,6R,8S)-4-Methyl-2-vinyl-1-oxaspiro[5.5]undecan-8-ol (19)**  
**and (2R,4R,6R,8R)-4-methyl-2-vinyl-1-oxaspiro[5.5]undecan-8-ol (19a)**

The general procedure for spirocycle synthesis was followed with **18** (42 mg, 0.2 mmol) and  $\text{Re}_2\text{O}_7$  (3 mg, 0.006 mmol) in DCM (1.0 mL) for 15 min at rt. The resultant mixture was purified via flash column chromatography using 0-20% ethyl acetate in hexanes as eluent in gradient elution and the eluted fractions concentrated *in vacuo* to give **19** and **19a** (32 mg, 76% yield) with a d.r. of 3.6:1 and **19** as the major isomer.

#### Major (slower-eluting) isomer (19)

$^1\text{H}$  NMR (500 MHz,  $\text{CDCl}_3$ ):  $\delta$  5.81 (ddd,  $J = 17.3, 10.6, 5.2$  Hz, 1H), 5.21 (dt,  $J = 17.5, 1.6$  Hz, 1H), 5.04 (dt,  $J = 10.5, 1.6$  Hz, 1H), 4.03 (dd,  $J = 11.5, 3.4$  Hz, 1H), 3.75 (tt,  $J = 11.1, 4.2$  Hz, 1H), 2.61 (d,  $J = 13.3$  Hz, 1H), 1.98 (d,  $J = 13.5$  Hz, 1H), 1.85-1.90 (m, 1H), 1.80 (qt,  $J = 13.3, 3.7$  Hz, 1H), 1.66 (d,  $J = 13.1$  Hz, 1H), 1.52-1.56 (m, 2H), 1.44 (ddd,  $J = 13.5, 3.8, 1.7$  Hz, 1H), 1.25 (td,  $J = 13.0, 4.1$  Hz, 1H), 1.17 (qd,  $J = 13.2, 4.0$  Hz, 1H), 0.98 (t,  $J = 12.8$  Hz, 1H), 0.91 (dd,  $J = 13.2, 11.3$  Hz, 1H), 0.89 (d,  $J = 6.1$  Hz, 3H), 0.86 (t,  $J = 12.4$  Hz, 1H), 0.84 (t,  $J = 12.4$  Hz, 1H)

$^{13}\text{C}$  NMR (125 MHz,  $\text{CDCl}_3$ ):  $\delta$  140.0, 114.1, 74.4, 70.2, 67.1, 45.1, 40.1, 39.1, 39.0, 36.0, 25.4, 22.5, 19.6

HRMS (ESI):  $m/z$  calcd for  $\text{C}_{13}\text{H}_{23}\text{O}_2$   $[\text{M}+\text{H}]^+$  211.1693, found 211.1690

IR (thin film): 3338, 2928, 1480, 1263, 1020, 735  $\text{cm}^{-1}$

#### Minor (faster-eluting) isomer (19a)

$^1\text{H}$  NMR (500 MHz,  $\text{CDCl}_3$ ):  $\delta$  5.80 (ddd,  $J = 17.2, 10.5, 5.8$  Hz, 1H), 5.26 (dt,  $J = 17.3, 1.5$  Hz, 1H), 5.08 (dt,  $J = 10.5, 1.3$  Hz, 1H), 4.22 (dd,  $J = 11.4, 5.7$  Hz, 1H), 3.94 (pent,  $J = 3.1$  Hz, 1H), 2.43 (d,  $J = 14.3$  Hz, 1H), 1.95-2.02 (m, 1H), 1.83-1.89 (m, 1H), 1.77 (dd,  $J = 13.6, 3.5$  Hz, 1H),

1.62-1.72 (m, 2H), 1.38-1.55 (m, 4H), 1.29 (d,  $J = 14.1$  Hz, 1H), 1.18-1.26 (m, 1H), 0.90 (d,  $J = 6.6$  Hz, 3H), 0.86-0.93 (m, 2H)

$^{13}\text{C}$  NMR (125 MHz,  $\text{CDCl}_3$ ):  $\delta$  139.1, 115.1, 74.6, 71.7, 67.7, 45.4, 40.1, 39.8, 34.7, 33.3, 25.3, 22.3, 16.0

HRMS (ESI):  $m/z$  calcd for  $\text{C}_{13}\text{H}_{23}\text{O}_2$   $[\text{M}+\text{H}]^+$  211.1693, found 211.1695

IR (thin film): 3420, 2927, 2868 1465, 1025, 920  $\text{cm}^{-1}$

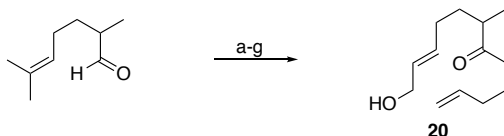

**Reagents and conditions**

a) *cis*-2-Butene-1,4-diol, Grubbs-Hoveyda second generation catalyst,  $\text{CH}_2\text{Cl}_2$ , 21%. b)  $(\text{MeO})_3\text{CH}$ , *p*-TsOH, MeOH, 0  $^\circ\text{C}$ , 88%. c) NaH, THF, then PMBCl,  $\text{Bu}_4\text{NI}$ , 62%. d) *p*-TsOH, acetone, 92%. e) Mg, 5-bromo-1-pentene,  $\text{Et}_2\text{O}$ , 73%. f) PCC, Celite,  $\text{CH}_2\text{Cl}_2$ , 81%. g) TFA,  $\text{CH}_2\text{Cl}_2$ , 65%.

**Scheme 5.** Synthesis of **20**.

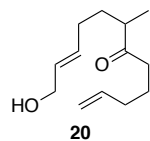

**(10E)-12-Hydroxy-7-methyldodeca-1,10-dien-6-one (20)**

$^1\text{H}$  NMR (400 MHz,  $\text{CDCl}_3$ ):  $\delta$  5.76 (ddt,  $J = 17.0, 10.2, 6.7$  Hz, 1H), 5.63-5.65 (m, 2H), 4.96-5.04 (m, 2H), 4.08 (t,  $J = 3.2$  Hz, 2H), 2.52 (sept,  $J = 6.7$  Hz, 1H), 2.47 (dt,  $J = 17.2, 7.3$  Hz, 1H), 2.41 (dt,  $J = 17.2, 7.3$  Hz, 1H), 1.99-2.08 (m, 4H), 1.76 (dp,  $J = 8.8, 4.0$  Hz, 1H), 1.66 (pent,  $J = 7.4$  Hz, 2H), 1.35-1.44 (m, 1H), 1.31 (t,  $J = 5.3$  Hz, 1H), 1.06 (d,  $J = 7.0$  Hz, 3H)

$^{13}\text{C}$  NMR (100 MHz,  $\text{CDCl}_3$ ):  $\delta$  214.4, 138.1, 132.2, 129.6, 115.2, 63.6, 45.7, 40.3, 33.1, 32.1, 29.9, 22.6, 16.5

HRMS (ESI):  $m/z$  calcd for  $\text{C}_{13}\text{H}_{23}\text{O}_2$   $[\text{M}+\text{H}]^+$  211.1698, found 211.1694

IR (thin film): 3400, 2934, 1706, 1425, 1268, 1078, 923  $\text{cm}^{-1}$

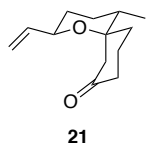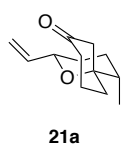

**(2R,5S,6S)-5-Methyl-2-vinyl-1-oxaspiro[5.5]undecan-8-one (21)**  
**and (2S,5S,6R)-5-methyl-2-vinyl-1-oxaspiro[5.5]undecan-8-one (21a)**

The general procedure for spirocycle synthesis was followed with **20** (20.2 mg, 0.1 mmol) and  $\text{Re}_2\text{O}_7$  (3.0 mg, 0.006 mmol) in DCM (1.2 mL) at rt for 10 min and the crude product mixture was purified via flash column chromatography with 20% ethyl acetate in hexane. The concentrated mixture was immediately subjected to PCC (40.0 mg, 0.19 mmol) and Celite (40.0 mg) in DCM

(1.0 mL) at rt for 15 min. The resultant crude mixture was then purified via flash column chromatography using 10% ethyl acetate in hexanes to give **21** and **21a** (18 mg, 88% yield over 2 steps) with a d.r. of 2.2:1 and **21** as the major diastereomer.

#### Mixture of diastereomers **21** and **21a**

$^1\text{H}$  NMR (400 MHz,  $\text{CDCl}_3$ ):  $\delta$  5.77 (ddd,  $J = 17.2, 10.5, 5.4$  Hz, 0.3H), 5.74 (ddd,  $J = 17.3, 10.6, 5.0$  Hz, 0.7H), 5.16 (dt,  $J = 17.3, 1.4$  Hz, 0.3H), 5.15 (dt,  $J = 17.3, 1.6$  Hz, 0.7H), 5.00-5.04 (m, 1H), 4.05-4.08 (m, 0.3H), 4.00-4.03 (m, 0.7H), 2.98 (dt,  $J = 13.8, 1.9$  Hz, 0.3H), 2.85 (dt,  $J = 13.9, 2.4$  Hz, 0.7H), 2.48 (d,  $J = 13.8$  Hz, 0.3H), 2.23 (d,  $J = 13.9$  Hz, 0.7H), 2.16-2.35 (m, 3H), 1.97-2.06 (m, 1H), 1.74-1.95 (m, 1H), 1.63-1.73 (m, 2H), 1.54-1.60 (m, 2H), 1.41-1.50 (m, 1H), 1.28-1.40 (m, 1H), 1.03 (d,  $J = 7.0$  Hz, 0.9H), 0.89 (d,  $J = 6.7$  Hz, 2.1H)

$^{13}\text{C}$  NMR (100 MHz,  $\text{CDCl}_3$ ):  $\delta$  210.7, 210.3, 139.6, 139.3, 114.6, 114.4, 80.7, 78.9, 70.6, 70.1, 48.4, 41.3, 40.83, 40.78, 39.0, 35.7, 34.4, 32.8, 31.6, 27.7, 26.0, 25.6, 20.7, 20.5, 17.3, 14.2

HRMS (ESI)  $m/z$  calcd for  $\text{C}_{13}\text{H}_{21}\text{O}_2$   $[\text{M}+\text{H}]^+$  209.1542, found 209.1567.

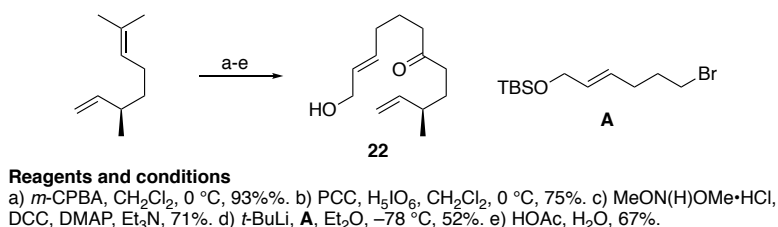

**Scheme 6.** Synthesis of **22**.

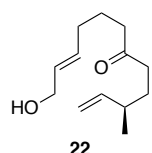

#### (**3R,10E**)-12-Hydroxy-3-methyldodeca-1,10-dien-6-one (**22**)

$^1\text{H}$  NMR (500 MHz,  $\text{CDCl}_3$ ):  $\delta$  5.63-5.66 (m, 2H), 5.62 (ddd,  $J = 17.0, 10.3, 7.9$  Hz, 1H), 4.96 (d,  $J = 17.0$  Hz, 1H), 4.93 (d,  $J = 10.3$  Hz, 1H), 4.09 (dd,  $J = 5.0, 4.7$  Hz, 2H), 2.36-2.41 (m, 4H), 2.09 (sept,  $J = 7.4$  Hz, 1H), 2.02-2.07 (m, 2H), 1.66 (pent,  $J = 7.4$  Hz, 2H), 1.58-1.64 (m, 1H), 1.48-1.55 (m, 1H), 1.24-1.27 (m, 1H), 1.00 (d,  $J = 6.8$  Hz, 3H)

$^{13}\text{C}$  NMR (125 MHz,  $\text{CDCl}_3$ ):  $\delta$  210.9, 143.8, 132.2, 129.8, 113.4, 63.7, 42.0, 40.6, 37.6, 31.6, 30.2, 23.1, 20.3

HRMS (ESI):  $m/z$  calcd for  $\text{C}_{13}\text{H}_{23}\text{O}_2$   $[\text{M}+\text{H}]^+$  211.1693, found 211.1694

IR (thin film): 3408, 2937, 1720, 1338, 1210, 1062, 941, 716  $\text{cm}^{-1}$

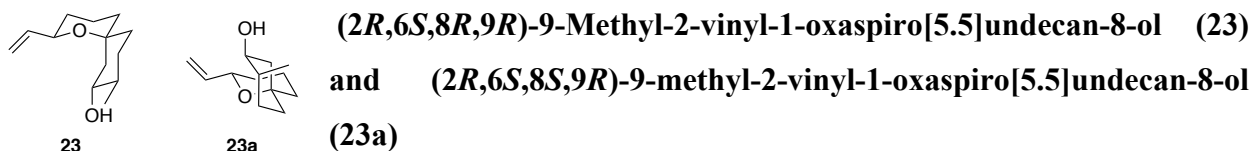

The general procedure for spirocycle synthesis was followed with **22** (15.3 mg, 0.1 mmol) and  $\text{Re}_2\text{O}_7$  (2.0 mg, 0.004 mmol) in DCM (1.0 mL) at rt for 15 min after which the resultant mixture was purified via flash column chromatography with 0-5% ethyl acetate in hexanes (gradient elution) and concentrated in vacuo to give **23** and **23a** (11.0 mg, 73% yield) with a diastereomeric ratio of 3:1 respectively.

**Major (faster-eluting) isomer (23)**

$^1\text{H}$  NMR (400 MHz,  $\text{CDCl}_3$ ):  $\delta$  5.82 (ddd,  $J = 17.5, 10.6, 5.1$  Hz, 1H), 5.21 (dt,  $J = 17.3, 1.7$  Hz, 1H), 5.05 (dt,  $J = 10.6, 1.6$  Hz, 1H), 4.04 (ddt,  $J = 12.0, 5.4, 1.6$  Hz, 1H), 3.32 (dd,  $J = 11.3, 3.0$  Hz, 1H), 2.70 (ddd,  $J = 13.5, 3.7, 2.7$  Hz, 1H), 1.70-1.79 (m, 1H), 1.61-1.68 (m, 2H), 1.46-1.57 (m, 2H), 1.36-1.42 (m, 3H), 1.18-1.35 (m, 4H), 1.02 (d,  $J = 6.4$  Hz, 3H), 0.92 (dd,  $J = 13.6, 11.0$  Hz, 1H)

$^{13}\text{C}$  NMR (100 MHz,  $\text{CDCl}_3$ ):  $\delta$  140.2, 114.1, 74.3, 72.4, 70.1, 40.6, 39.5, 38.1, 36.1, 31.5, 28.3, 19.4, 18.2

HRMS (ESI):  $m/z$  calcd for  $\text{C}_{13}\text{H}_{23}\text{O}_2$   $[\text{M}+\text{H}]^+$  211.1693, found 211.1704

IR (thin film): 3401, 3028, 2929, 1442, 1054, 916, 776  $\text{cm}^{-1}$

**Minor (slower-eluting) isomer (23a)**

$^1\text{H}$  NMR (400 MHz,  $\text{CDCl}_3$ ):  $\delta$  5.81 (ddd,  $J = 16.6, 10.6, 5.9$  Hz, 1H), 5.23 (dt,  $J = 17.2, 5.4$  Hz, 1H), 5.08 (dt,  $J = 10.5, 1.3$  Hz, 1H), 4.19 (dd,  $J = 11.1, 6.0$  Hz, 1H), 3.36 (td,  $J = 7.4, 3.4$  Hz, 1H), 2.62 (br, 1H), 1.96-2.05 (m, 1H), 1.88-1.95 (m, 1H), 1.77-1.83 (m, 1H), 1.60-1.76 (m, 5H), 1.22-1.32 (m, 4H), 1.05-1.16 (m, 1H), 0.98 (d,  $J = 6.9$  Hz, 3H)

$^{13}\text{C}$  NMR (100 MHz,  $\text{CDCl}_3$ ):  $\delta$  139.7, 114.9, 74.4, 73.4, 71.3, 31.6, 26.6, 19.1, 17.3 (Note: some peaks did not emerge above the baseline and hence could not be reported)

HRMS (ESI):  $m/z$  calcd for  $\text{C}_{13}\text{H}_{23}\text{O}_2$   $[\text{M}+\text{H}]^+$  211.1693, found 211.1698

IR (thin film): 3371, 2978, 1472, 1050, 946, 718  $\text{cm}^{-1}$

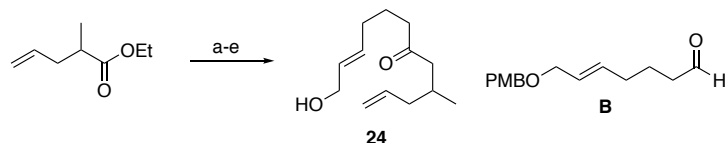

**Reagents and conditions**  
 a) DIBAL-H, THF, °C, 96%. b) I<sub>2</sub>, Ph<sub>3</sub>P, imidazole, CH<sub>2</sub>Cl<sub>2</sub>, 94%. c) Mg, I<sub>2</sub>, THF, then **B**, 76%.  
 d) PCC, Celite, CH<sub>2</sub>Cl<sub>2</sub>, 89%. e) 10% TFA, CH<sub>2</sub>Cl<sub>2</sub>, 89%.

**Scheme 7.** Synthesis of **24**.

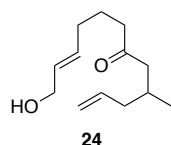

**(E)-12-Hydroxy-4-methyldodeca-1,10-dien-6-one (24)**

<sup>1</sup>H NMR (500 MHz, CDCl<sub>3</sub>) δ 5.74 (ddt, *J* = 14.4, 11.2, 7.2 Hz, 1H), 5.61-5.69 (m, 2H), 4.99-5.02 (m, 2H), 4.09 (d, *J* = 3.7 Hz, 2H), 2.41 (dd, *J* = 15.9, 5.4 Hz, 1H), 2.38 (t, *J* = 6.3 Hz, 2H), 2.19 (dd, *J* = 16.0, 7.9 Hz, 1H), 2.11 (oct, *J* = 6.6 Hz, 1H), 2.03-2.07 (m, 3H), 1.95-2.01 (m, 2H), 1.66 (pent, *J* = 7.4 Hz, 2H), 0.90 (d, 3H, *J* = 6.9 Hz)  
<sup>13</sup>C NMR (125 MHz, CDCl<sub>3</sub>) δ 210.6, 136.7, 132.2, 129.8, 116.4, 63.7, 49.4, 42.6, 41.2, 31.6, 28.9, 23.0, 19.8

HRMS (ESI): *m/z* calcd for C<sub>13</sub>H<sub>22</sub>O<sub>2</sub>Na [M+Na]<sup>+</sup> 233.1512, found 233.1507

IR (thin film): 3391, 3107, 2927, 1706, 1370, 1088, 998, 703 cm<sup>-1</sup>

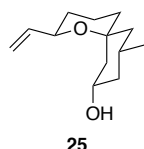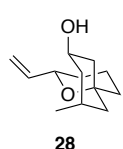

**(2R,6S,8S,10R)-10-Methyl-2-vinyl-1-oxaspiro[5.5]undecan-8-ol (25) and (2R,6S,8S,10S)-10-methyl-2-vinyl-1-oxaspiro[5.5]undecan-8-ol (28)**

The general procedure for spirocycle synthesis was followed with **24** (30 mg, 0.14 mmol) and Re<sub>2</sub>O<sub>7</sub> (2 mg, 0.004 mmol) in DCM (1.0 mL) for 2 h with slow warming of the reaction from 0 °C to rt. The resultant crude mixture was purified via flash column chromatography with 10% ethyl acetate in hexanes as eluent to give **25** and **28** (21 mg, 70% yield) with a d.r. of 3.8:1 and **25** as the major diastereomer.

**Major (faster-eluting) isomer (25)**

<sup>1</sup>H NMR (500 MHz, CDCl<sub>3</sub>): δ 5.81 (ddd, *J* = 17.3, 10.6, 5.2 Hz, 1H), 5.20 (dt, *J* = 17.3, 1.7 Hz, 1H), 5.05 (dt, *J* = 10.5, 1.5 Hz, 1H), 4.04 (ddt, *J* = 11.4, 3.1, 1.4 Hz, 1H), 3.80 (tt, *J* = 11.3, 4.2 Hz, 1H), 2.71 (ddt, *J* = 13.2, 4.2, 2.2 Hz, 1H), 1.95-2.04 (m, 2H), 1.71-1.78 (m, 1H), 1.63-1.68 (m, 2H), 1.58 (ddt, *J* = 13.4, 4.1, 2.4 Hz, 1H), 1.36-1.41 (m, 3H), 1.24 (qd, *J* = 11.7, 4.2 Hz, 1H), 0.94 (dd, *J* = 13.3, 12.2 Hz, 1H), 0.90 (d, *J* = 6.6 Hz, 3H), 0.86 (t, *J* = 11.2 Hz, 1H), 0.80 (dd, *J* = 13.3, 11.4 Hz, 1H)

$^{13}\text{C}$  NMR (125 MHz,  $\text{CDCl}_3$ )  $\delta$  140.1, 114.2, 74.3, 70.2, 66.9, 47.9, 47.8, 38.0, 36.1, 31.4, 25.7, 21.9, 19.3

HRMS (ESI):  $m/z$  calcd for  $\text{C}_{13}\text{H}_{23}\text{O}_2$   $[\text{M}+\text{H}]^+$  211.1693, found 211.1689

IR (thin film): 3370, 2930, 2868, 1457, 1366, 1024,  $735\text{ cm}^{-1}$

**Minor (slower-eluting) isomer (28)**

$^1\text{H}$  NMR (600 MHz,  $\text{CDCl}_3$ ):  $\delta$  5.81 (ddd,  $J = 17.0, 10.4, 5.9\text{ Hz}$ , 1H), 5.20 (d,  $J = 17.3\text{ Hz}$ , 1H), 5.05 (d,  $J = 10.4\text{ Hz}$ , 1H), 4.14 (dd,  $J = 10.9, 5.5\text{ Hz}$ , 1H), 3.61 (tt,  $J = 9.0, 4.4\text{ Hz}$ , 1H), 2.69 (dt,  $J = 11.8, 1.8\text{ Hz}$ , 1H), 1.96 (d,  $J = 12.1\text{ Hz}$ , 1H), 1.67-1.72 (m, 3H), 1.64 (d,  $J = 12.9\text{ Hz}$ , 1H), 1.57 (d,  $J = 12.3\text{ Hz}$ , 1H), 1.50-1.54 (m, 1H), 1.39-1.47 (m, 1H), 1.19-1.31 (m, 4H), 1.07 (t,  $J = 11.7\text{ Hz}$ , 1H), 0.94 (d,  $J = 6.3\text{ Hz}$ , 3H)

$^{13}\text{C}$  NMR (125 MHz,  $\text{CDCl}_3$ ):  $\delta$  140.1, 114.8, 74.2, 71.1, 68.4, 49.0, 44.7, 39.9, 32.3, 31.7, 26.4, 22.2, 19.3

HRMS (ESI):  $m/z$  calcd for  $\text{C}_{13}\text{H}_{23}\text{O}_2$   $[\text{M}+\text{H}]^+$  211.1693, found 211.1687

IR (thin film): 3375, 2927, 2869, 1411, 1365, 1019,  $720\text{ cm}^{-1}$

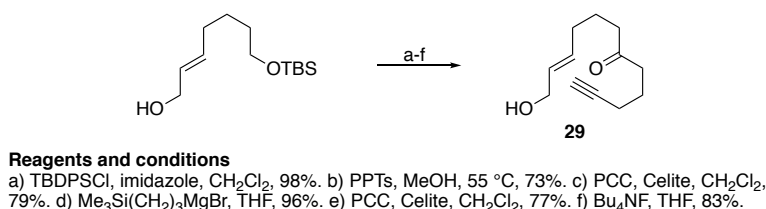

**Scheme 8.** Synthesis of **29**.

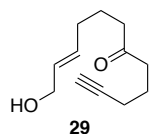

**(E)-12-Hydroxydodec-10-en-1-yn-6-one (29)**

$^1\text{H}$  NMR (500 MHz,  $\text{CDCl}_3$ ):  $\delta$  5.60-5.68 (m, 2H), 4.09 (d,  $J = 0.9\text{ Hz}$ , 2H), 2.54 (t,  $J = 7.2\text{ Hz}$ , 2H), 2.42 (t,  $J = 7.4\text{ Hz}$ , 2H), 2.22 (dt,  $J = 6.8, 2.6\text{ Hz}$ , 2H), 2.04-2.07 (m, 2H), 1.95 (t,  $J = 2.6\text{ Hz}$ , 1H), 1.78 (pent,  $J = 7.1\text{ Hz}$ , 2H), 1.68 (pent,  $J = 7.4\text{ Hz}$ , 2H)

$^{13}\text{C}$  NMR (125 MHz,  $\text{CDCl}_3$ ):  $\delta$  210.2, 132.0, 129.9, 83.6, 69.0, 63.6, 42.1, 41.1, 31.5, 23.1, 22.2, 17.8

HRMS (ESI):  $m/z$  calcd for  $\text{C}_{12}\text{H}_{18}\text{O}_2\text{Na}$   $[\text{M}+\text{Na}]^+$  217.1199, found 217.1192

IR (thin film): 3414, 3288, 2934, 1706, 1372, 1091, 973,  $639\text{ cm}^{-1}$



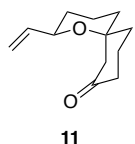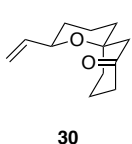

**(2*R*,6*S*)-2-Vinyl-1-oxaspiro[5.5]undecan-8-one (11) and (2*R*,6*R*)-2-vinyl-1-oxaspiro[5.5]undecan-8-one (30)**

The general procedure for spirocycle synthesis was followed with **29** (25 mg, 0.13 mmol) and  $\text{Re}_2\text{O}_7$  (3 mg, 0.006 mmol) in DCM (0.8 mL) at rt for 10 min. The crude reaction mixture was then quenched with a drop of pyridine and purified via gradient-elution flash column chromatography with 0-5% ethyl acetate in hexanes as eluent to yield **11** and **30** (20.2 mg, 81%) in a 1:1 ratio.

**Faster-eluting product (11)**

$^1\text{H}$  NMR (500 MHz,  $\text{CDCl}_3$ ):  $\delta$  5.77 (ddd,  $J = 17.5, 10.6, 5.3$  Hz, 1H), 5.17 (dt,  $J = 17.3, 1.6$  Hz, 1H), 5.04 (dt,  $J = 10.6, 1.5$  Hz, 1H), 4.04 (ddt,  $J = 11.2, 2.6, 1.1$  Hz, 1H), 2.96 (dt,  $J = 13.9, 1.6$  Hz, 1H), 2.31-2.38 (m, 2H), 2.25-2.31 (m, 1H), 2.10-2.19 (m, 1H), 1.85-1.89 (m, 1H), 1.75-1.83 (m, 2H), 1.63-1.70 (m, 3H), 1.56-1.59 (m, 1H), 1.39-1.45 (m, 1H), 1.20-1.42 (m, 1H)

$^{13}\text{C}$  NMR (125 MHz,  $\text{CDCl}_3$ )  $\delta$  (ppm) 210.0, 139.5, 114.6, 70.6, 46.4, 40.9, 38.9, 34.7, 31.1, 29.7, 20.5, 18.9

HRMS (ESI):  $m/z$  calcd for  $\text{C}_{12}\text{H}_{19}\text{O}_2$   $[\text{M}+\text{H}]^+$  195.1380, found 195.1376

IR (thin film): 2933, 2870, 1711, 1440, 1227, 1048, 984, 710  $\text{cm}^{-1}$

**Slower-eluting product (30)**

$^1\text{H}$  NMR (500 MHz,  $\text{CDCl}_3$ ):  $\delta$  5.77 (ddd,  $J = 17.2, 10.6, 5.2$  Hz, 1H), 5.16 (dt,  $J = 17.3, 1.4$  Hz, 1H), 5.02 (dt,  $J = 10.5, 1.2$  Hz, 1H), 3.92 (dd,  $J = 11.6, 3.3$  Hz, 1H), 2.37-2.45 (m, 3H), 2.28-2.36 (m, 1H), 2.19-2.26 (m, 1H), 1.74-1.87 (m, 3H), 1.68-1.74 (m, 2H), 1.56-1.67 (m, 2H), 1.48-1.53 (m, 1H), 1.38 (td,  $J = 13.1, 5.8$  Hz, 1H)

$^{13}\text{C}$  NMR (125 MHz,  $\text{CDCl}_3$ ):  $\delta$  209.9, 139.6, 114.1, 70.6, 55.5, 40.9, 34.6, 30.9, 29.7, 28.4, 20.0, 19.4

HRMS (ESI):  $m/z$  calcd for  $\text{C}_{12}\text{H}_{19}\text{O}_2$   $[\text{M}+\text{H}]^+$  195.1380, found 195.1376

IR (thin film): 2932, 2850, 1715, 1442, 1225, 1019, 982  $\text{cm}^{-1}$

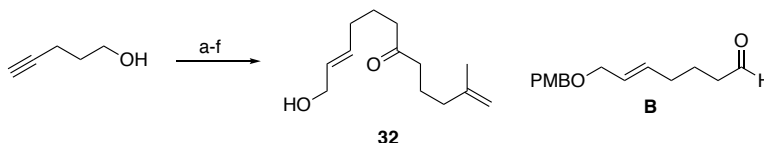

**Reagents and conditions**

a)  $\text{Me}_3\text{Al}$ ,  $\text{Cp}_2\text{ZrCl}_2$ ,  $\text{CH}_2\text{Cl}_2$ , 77%. b)  $\text{MsCl}$ ,  $\text{Et}_3\text{N}$ ,  $\text{CH}_2\text{Cl}_2$ , 0  $^\circ\text{C}$ , 64%. c)  $\text{LiBr}$ , acetone, reflux, 80%. d)  $\text{Mg}$ ,  $\text{I}_2$ , THF, then **B**, 71%. e)  $\text{PCC}$ , Celite,  $\text{CH}_2\text{Cl}_2$ , 98%. f)  $\text{TFA}$ ,  $\text{CH}_2\text{Cl}_2$ , 48%.

**Scheme 9.** Synthesis of **32**.

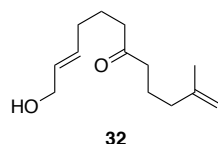

**(E)-12-Hydroxy-2-methyldodeca-1,10-dien-6-one (32)**

$^1\text{H}$  NMR (400 MHz,  $\text{CDCl}_3$ ):  $\delta$  5.60-5.70 (m, 2H), 4.72 (dt,  $J = 1.3, 0.7$  Hz, 1H), 4.66 (dt,  $J = 1.9, 1.0$  Hz, 1H), 4.09 (d,  $J = 3.6$  Hz, 2H), 2.39 (t,  $J = 7.6$  Hz, 2H), 2.38 (t,  $J = 7.6$  Hz, 2H), 2.02-2.10 (m, 2H), 2.00 (t,  $J = 7.7$  Hz, 2H), 1.71 (pent,  $J = 7.8$  Hz, 2H), 1.69 (s, 3H), 1.67 (pent,  $J = 7.4$  Hz, 2H)

$^{13}\text{C}$  NMR (100 MHz,  $\text{CDCl}_3$ ):  $\delta$  211.0, 145.1, 132.2, 129.8, 110.6, 63.7, 42.1, 42.0, 37.1, 31.6, 23.1, 22.2, 21.4

HRMS (ESI):  $m/z$  calcd for  $\text{C}_{13}\text{H}_{22}\text{O}_2\text{Na}$   $[\text{M}+\text{Na}]^+$  233.1512, found 233.1504

IR (thin film): 3401, 3110, 2932, 1707, 1338, 1065, 921, 703  $\text{cm}^{-1}$

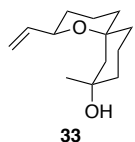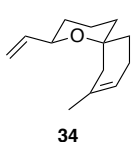

**(2R,6S,8S)-8-Methyl-2-vinyl-1-oxaspiro[5.5]undecan-8-ol (33) and (2R)-8-methyl-2-vinyl-1-oxaspiro[5.5]undec-7-ene (34)**

The general procedure for spirocycle synthesis was followed with **32** (43.7 mg, 0.21 mmol) and  $\text{Re}_2\text{O}_7$  (3 mg, 0.006 mmol) in DCM (1.3 mL) at  $-10^\circ\text{C}$ . The reaction was slowly warmed to  $0^\circ\text{C}$  over 2 h, after which time the crude mixture was purified with gradient-elution flash column chromatography using 0-10% ethyl acetate in hexanes as eluent and concentrated *in vacuo* to give **33** and **34** (37.6 mg, 86% yield) in a ratio of 2.6:1 with **33** as the major product.

**Major (slower-eluting) product (33)**

$^1\text{H}$  NMR (500 MHz,  $\text{CDCl}_3$ ):  $\delta$  5.80 (ddd,  $J = 17.1, 10.6, 5.3$  Hz, 1H), 5.20 (d,  $J = 17.2$  Hz, 1H), 5.05 (d,  $J = 10.5$  Hz, 1H), 4.03 (dd,  $J = 11.3, 4.4$  Hz, 1H), 2.26 (d,  $J = 13.9$  Hz, 1H), 1.67-1.77 (m, 2H), 1.61-1.67 (m, 3H), 1.53-1.61 (m, 3H), 1.42 (dt,  $J = 12.4, 4.1$  Hz, 1H), 1.33-1.38 (m, 3H), 1.32 (s, 3H), 1.22-1.28 (m, 2H)

$^{13}\text{C}$  NMR (125 MHz,  $\text{CDCl}_3$ ):  $\delta$  140.0, 114.1, 73.8, 71.2, 70.6, 42.0, 40.9, 40.01, 36.3, 31.6, 28.1, 19.4, 19.3

HRMS (ESI):  $m/z$  calcd for  $\text{C}_{13}\text{H}_{21}\text{O}_2\text{H}$   $[\text{M}-\text{H}]^-$  209.1536, found 209.1533

IR (thin film): 3377, 2927, 2851, 1439, 1022, 916, 776  $\text{cm}^{-1}$

**Minor (faster-eluting) product (34)**

$^1\text{H}$  NMR (500 MHz,  $\text{CDCl}_3$ ):  $\delta$  5.84 (ddd,  $J = 16.8, 10.5, 5.8$  Hz, 1H), 5.35 (s, 1H), 5.21 (d,  $J = 16.8$  Hz, 1H), 5.06 (d,  $J = 10.5$  Hz, 1H), 4.10 (dd,  $J = 11.2, 5.2$  Hz, 1H), 2.30 (d,  $J = 16.7$  Hz, 1H),

2.10-2.15 (m, 1H), 2.08 (d,  $J = 17.1$  Hz, 1H), 1.96-2.05 (m, 1H), 1.67-1.75 (m, 3H), 1.62-1.67 (m, 4H), 1.52-1.56 (m, 1H), 1.25 (s, 3H)

$^{13}\text{C}$  NMR (125 MHz,  $\text{CDCl}_3$ ):  $\delta$  140.4, 131.5, 120.3, 114.4, 72.6, 70.9, 36.6, 36.3, 31.9, 31.7, 23.8, 23.0, 19.3

HRMS (ESI):  $m/z$  calcd for  $\text{C}_{13}\text{H}_{21}\text{O}$   $[\text{M}+\text{H}]^+$  193.1587, found 193.1583;

IR (thin film): 2931, 2844, 1438, 1043, 918, 737  $\text{cm}^{-1}$

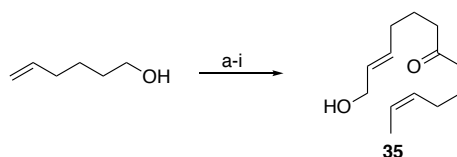

**Reagents and conditions**

a) TBSCl, imidazole,  $\text{CH}_2\text{Cl}_2$ , 99%. b) Methyl acrylate, Grubbs-Hoveyda II catalyst,  $\text{CH}_2\text{Cl}_2$ , 57%. c) DIBAL-H,  $\text{CH}_2\text{Cl}_2$ ,  $-78^\circ\text{C}$ , 89%. d) NaH, THF, then PMBCl,  $0^\circ\text{C}$ , 77%. e)  $\text{Bu}_4\text{NF}$ , THF,  $0^\circ\text{C}$ , 39%. f) PCC, Celite,  $\text{CH}_2\text{Cl}_2$ , 80%. g)  $(Z)\text{-CH}_3\text{CH}=\text{CH}(\text{CH}_2)_3\text{MgBr}$ , THF, 80%. h) PCC, Celite,  $\text{CH}_2\text{Cl}_2$ , 94%. i) TFA,  $\text{CH}_2\text{Cl}_2$ , 91%.

**Scheme 10. Synthesis of 35.**

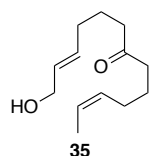

**(2E,11Z)-1-Hydroxytrideca-2,11-dien-7-one (35)**

$^1\text{H}$  NMR (500 MHz,  $\text{CDCl}_3$ ):  $\delta$  5.61-5.69 (m, 2H), 5.47 (dqt,  $J = 12.9, 7.3, 1.7$  Hz, 1H), 5.34 (dtq,  $J = 12.4, 7.2, 1.6$  Hz, 1H), 4.09 (d,  $J = 3.0$  Hz, 2H), 2.40 (t,  $J = 7.2$  Hz, 2H), 2.39 (t,  $J = 7.2$  Hz, 2H), 2.02-2.10 (m, 4H), 1.67, (pent,  $J = 7.6$  Hz, 2H), 1.64 (pent,  $J = 7.5$  Hz, 2H), 1.59 (ddt,  $J = 6.9, 1.8, 0.8$  Hz, 3H), 1.51-1.58 (m, 1H)

$^{13}\text{C}$  NMR (125 MHz,  $\text{CDCl}_3$ ):  $\delta$  210.9, 132.2, 129.8, 129.6, 124.8, 63.7, 42.2, 42.0, 31.6, 26.2, 23.6, 23.1, 12.8

HRMS (ESI):  $m/z$  calcd for  $\text{C}_{13}\text{H}_{22}\text{O}_2\text{Na}$   $[\text{M}+\text{Na}]^+$  233.1512, found 233.1508

IR (thin film): 3404, 3115, 2929, 1707, 1408, 1371, 1266, 1087, 971, 736  $\text{cm}^{-1}$

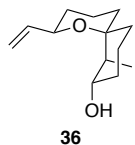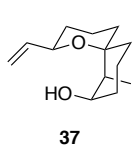

**(2R,6R,7S,8S)-7-Methyl-2-vinyl-1-oxaspiro[5.5]undecan-8-ol (36) and (2R,6R,7S,8R)-7-methyl-2-vinyl-1-oxaspiro[5.5]undecan-8-ol (37)**

The general procedure for spirocycle synthesis was followed with **35** (10 mg, 0.05 mmol) and  $\text{Re}_2\text{O}_7$  (3 mg, 0.006 mmol) in DCM (0.6 mL) for 1 h at  $0^\circ\text{C}$ . The crude reaction mixture was then purified via gradient-elution flash column chromatography with 0-10% ethyl acetate in hexanes as

eluent to give **36** and **37** (8.1 mg, 81%) with a diastereomeric ratio of 4:1 and **36** as the major isomer.

**Major (slower-eluting) isomer (36)**

<sup>1</sup>H NMR (400 MHz, CDCl<sub>3</sub>): δ 5.83 (ddd, *J* = 16.9, 10.4, 5.8 Hz, 1H), 5.22 (dt, *J* = 16.9, 1.6 Hz, 1H), 5.07 (dt, *J* = 10.5, 1.6 Hz, 1H), 4.00 (dd, *J* = 9.2, 6.2 Hz, 1H), 3.79 (td, *J* = 9.9, 4.4 Hz, 1H), 2.39-2.46 (m, 1H), 1.96 (dt, *J* = 13.7, 4.0 Hz, 1H), 1.68-1.76 (m, 3H), 1.61-1.66 (m, 4H), 1.46-1.54 (m, 1H), 1.28-1.38 (m, 2H), 1.18-1.25 (m, 2H), 0.98 (d, *J* = 7.0 Hz, 3H)

<sup>13</sup>C NMR (100 MHz, CDCl<sub>3</sub>): δ 139.9, 114.7, 76.1, 70.7, 70.5, 53.4, 36.4, 34.8, 30.8, 29.7, 26.2, 23.6, 18.7

HRMS (ESI): *m/z* calcd for C<sub>13</sub>H<sub>23</sub>O<sub>2</sub> [M+H]<sup>+</sup> 211.1693, found 211.1687

IR (thin film): 3402, 2956, 2869, 1467, 1284, 1042, 917, 735 cm<sup>-1</sup>

**Minor (faster-eluting) isomer (37)**

<sup>1</sup>H NMR (400 MHz, CDCl<sub>3</sub>): δ 5.82 (ddd, *J* = 17.3, 10.6, 5.9 Hz, 1H), 5.22 (dt, *J* = 17.3, 1.6 Hz, 1H), 5.05 (dt, *J* = 10.6, 1.6 Hz, 1H), 4.16 (dd, *J* = 11.4, 3.4 Hz, 1H), 4.02 (dq, *J* = 11.6, 4.4 Hz, 1H), 3.78 (d, *J* = 11.6 Hz, 1H), 2.63 (pent, *J* = 6.8 Hz, 1H), 2.34-2.43 (m, 1H), 2.00-2.08 (m, 1H), 1.79 (dt, *J* = 11.4, 4.5 Hz, 1H), 1.71 (ddt, *J* = 13.5, 3.4, 1.5 Hz, 1H), 1.62-1.65 (m, 2H), 1.47-1.52 (m, 2H), 1.37-1.45 (m, 2H), 1.27-1.30 (m, 2H), 0.86 (d, *J* = 6.9 Hz, 3H)

<sup>13</sup>C NMR (100 MHz, CDCl<sub>3</sub>): δ 140.4, 113.9, 75.32, 70.2, 69.1, 68.5, 34.3, 33.4, 33.0, 31.4, 28.8, 19.2, 18.4

HRMS (ESI): *m/z* calcd for C<sub>13</sub>H<sub>23</sub>O<sub>2</sub> [M+H]<sup>+</sup> 211.1693, found 211.1687

IR (thin film): 3403, 2981, 2876, 1414, 1254, 1012, 937, 731 cm<sup>-1</sup>

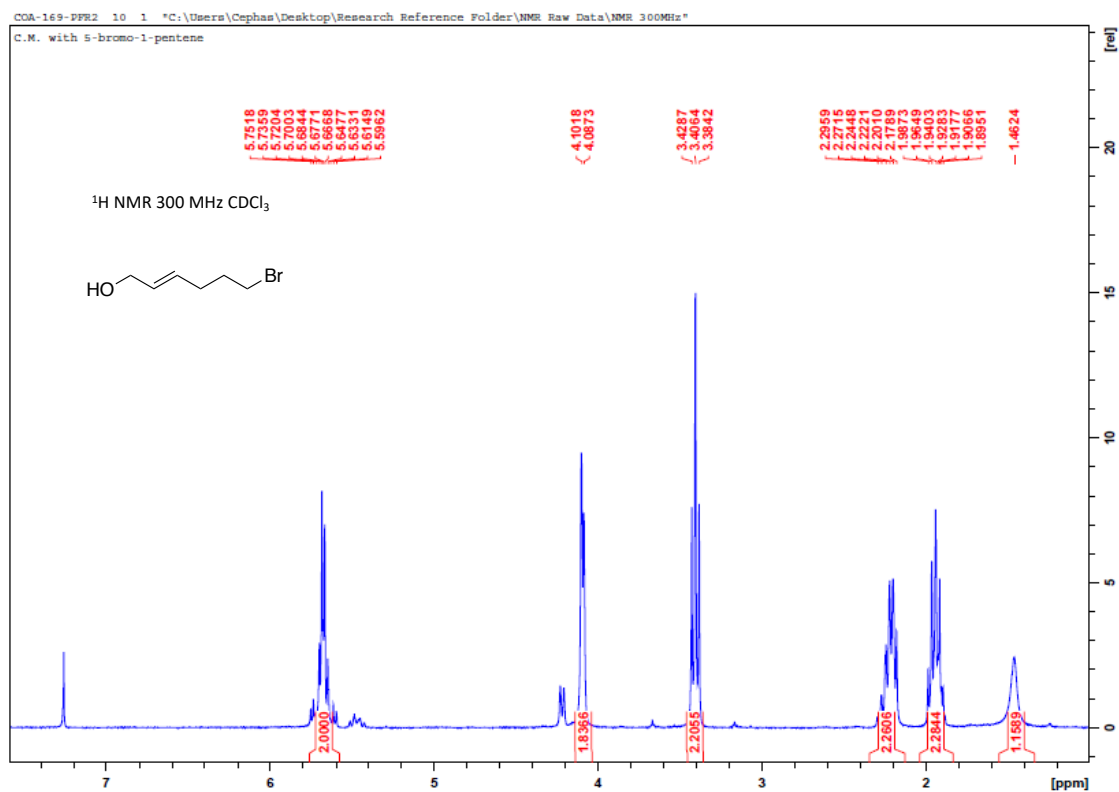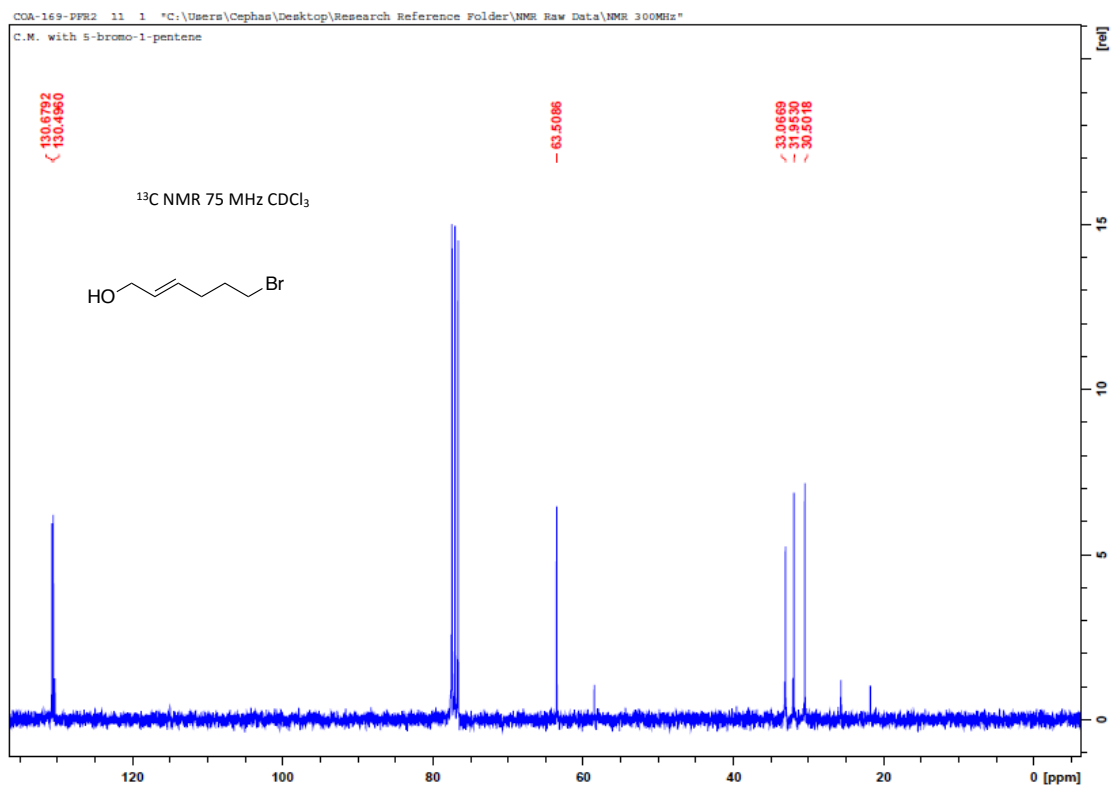

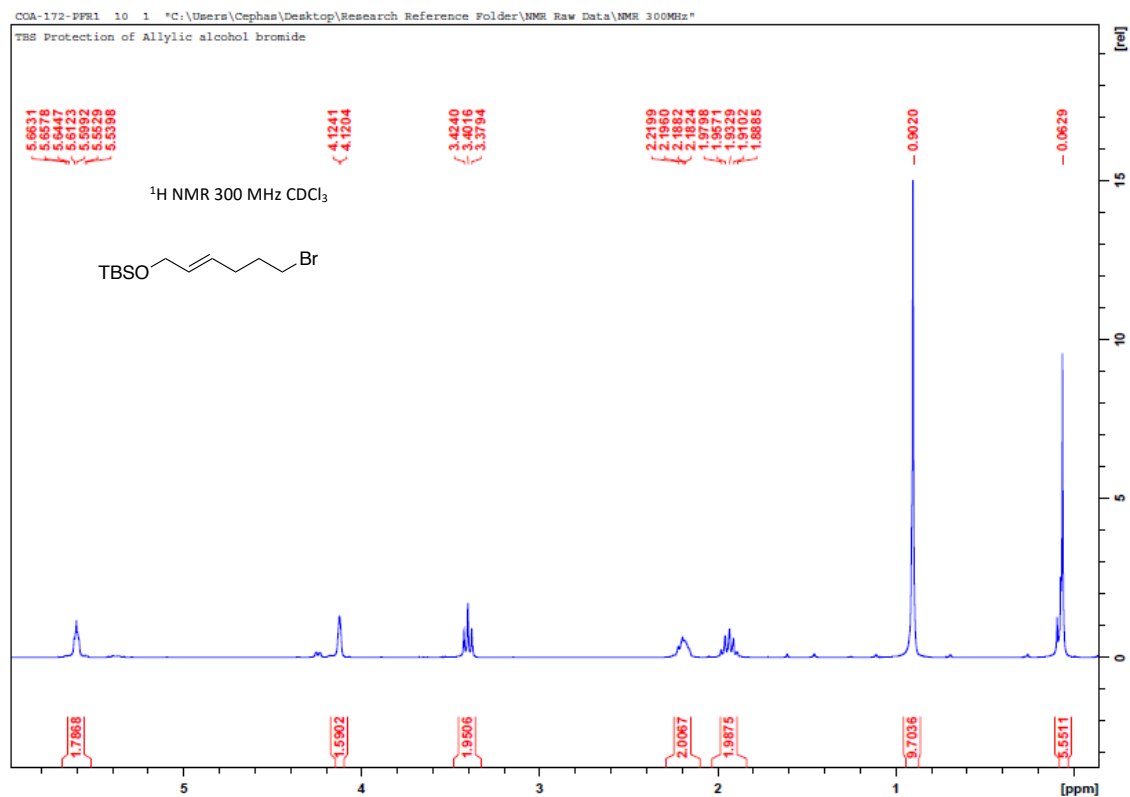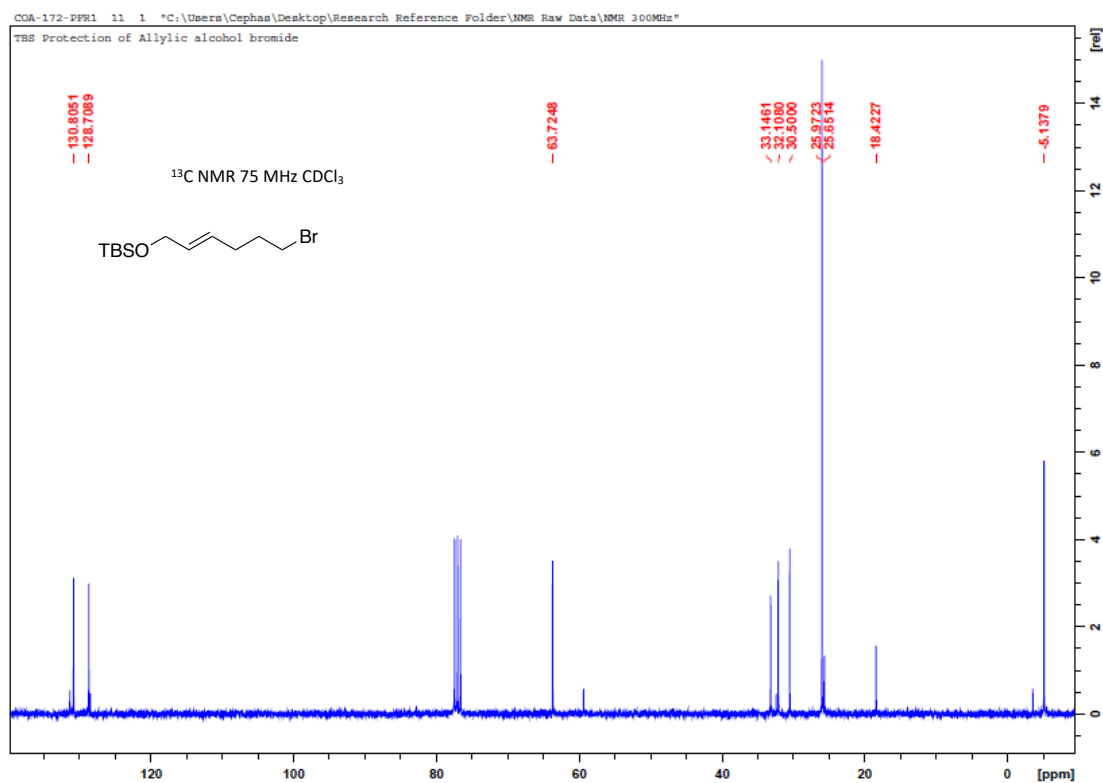

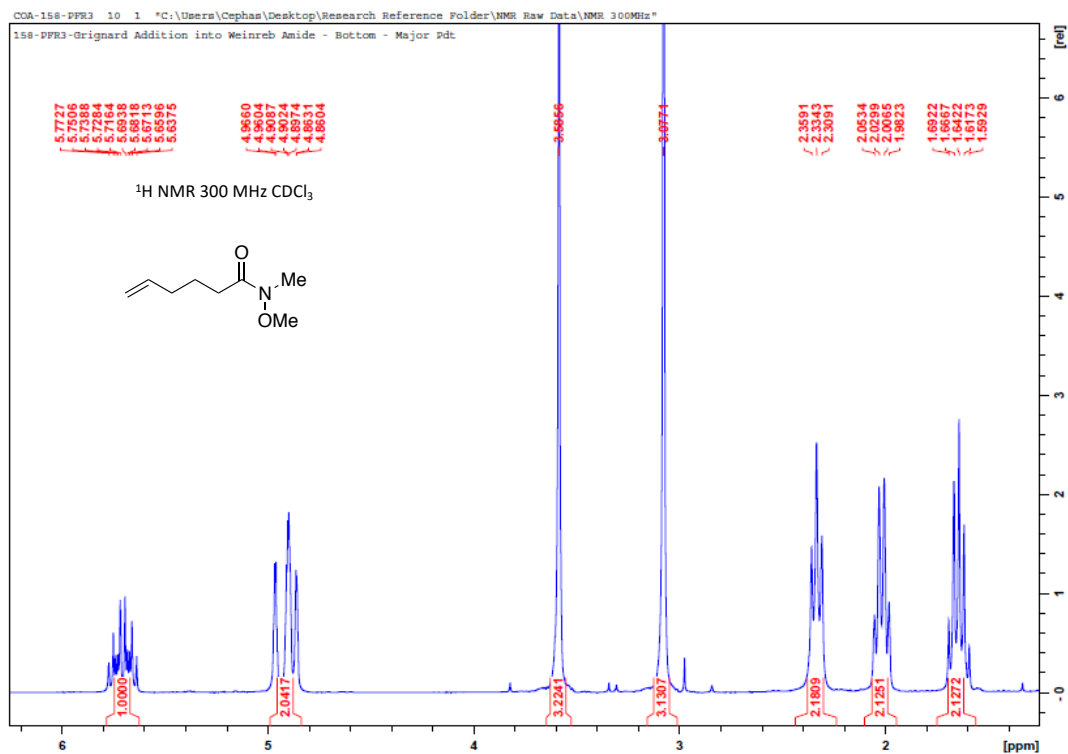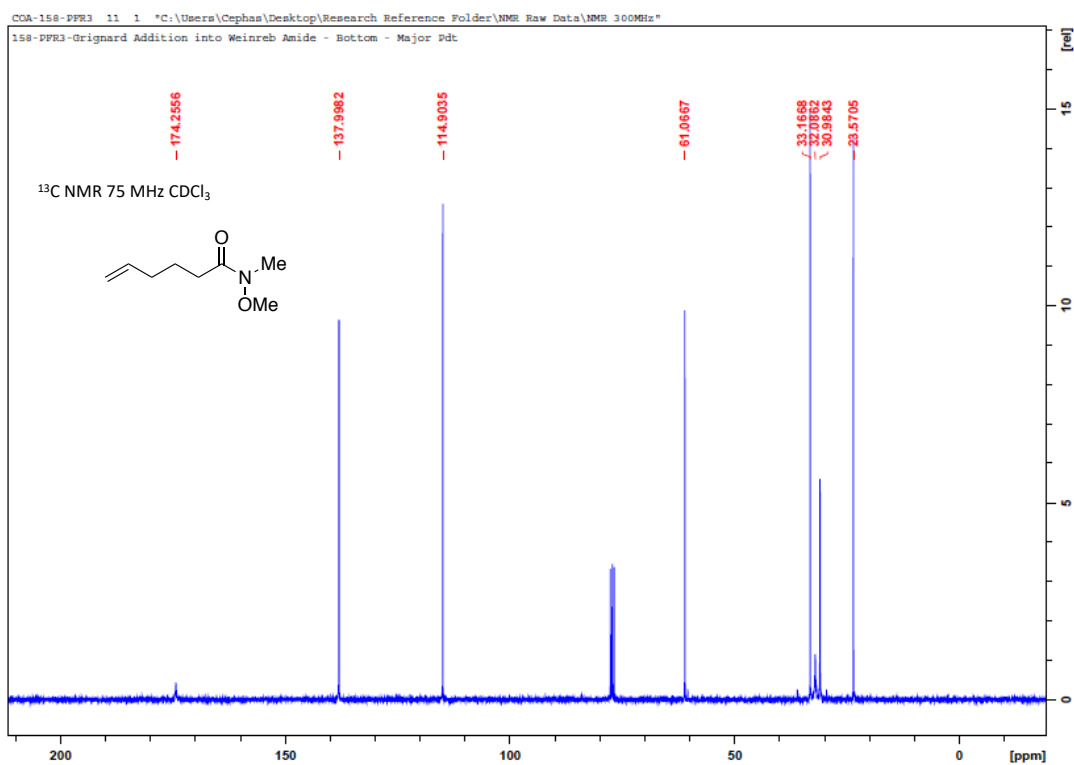

2-248 1H 500

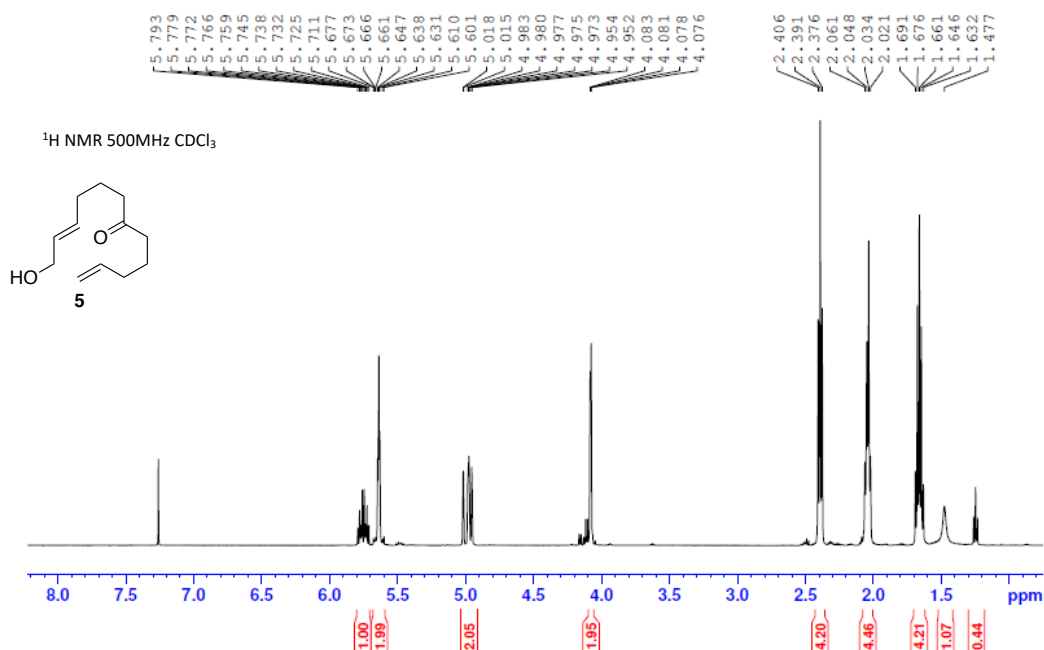

2-248 13C 500

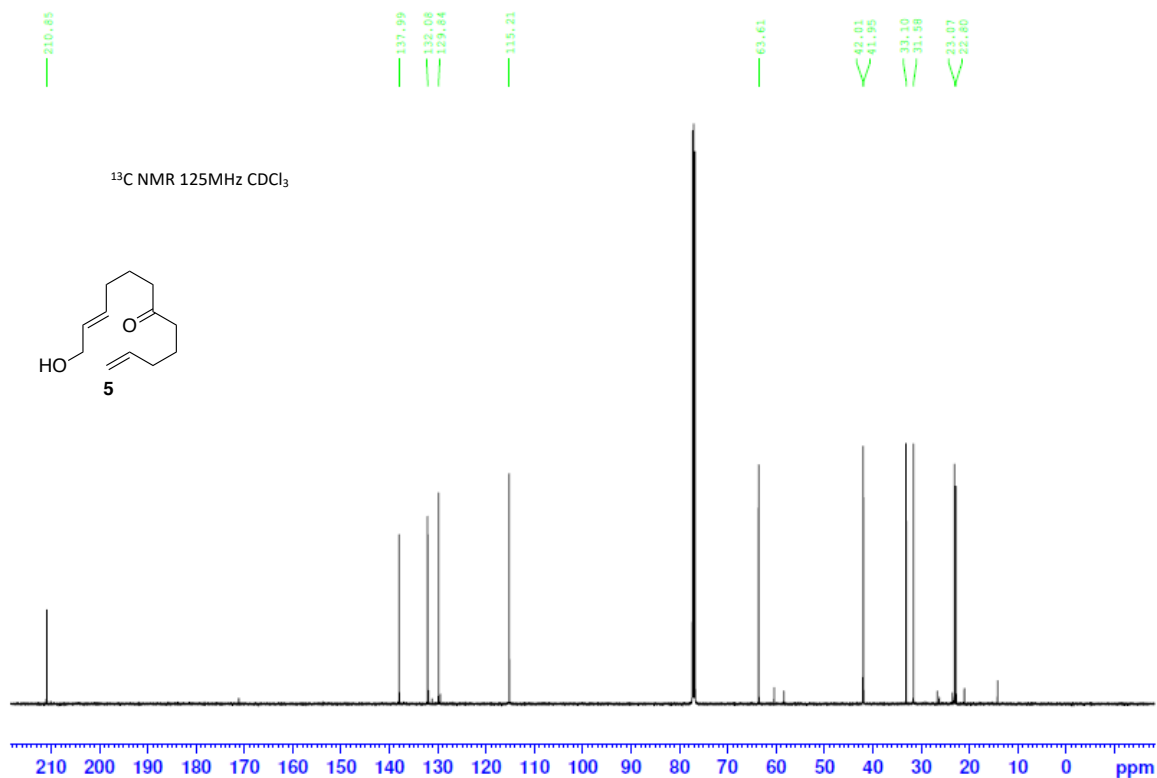



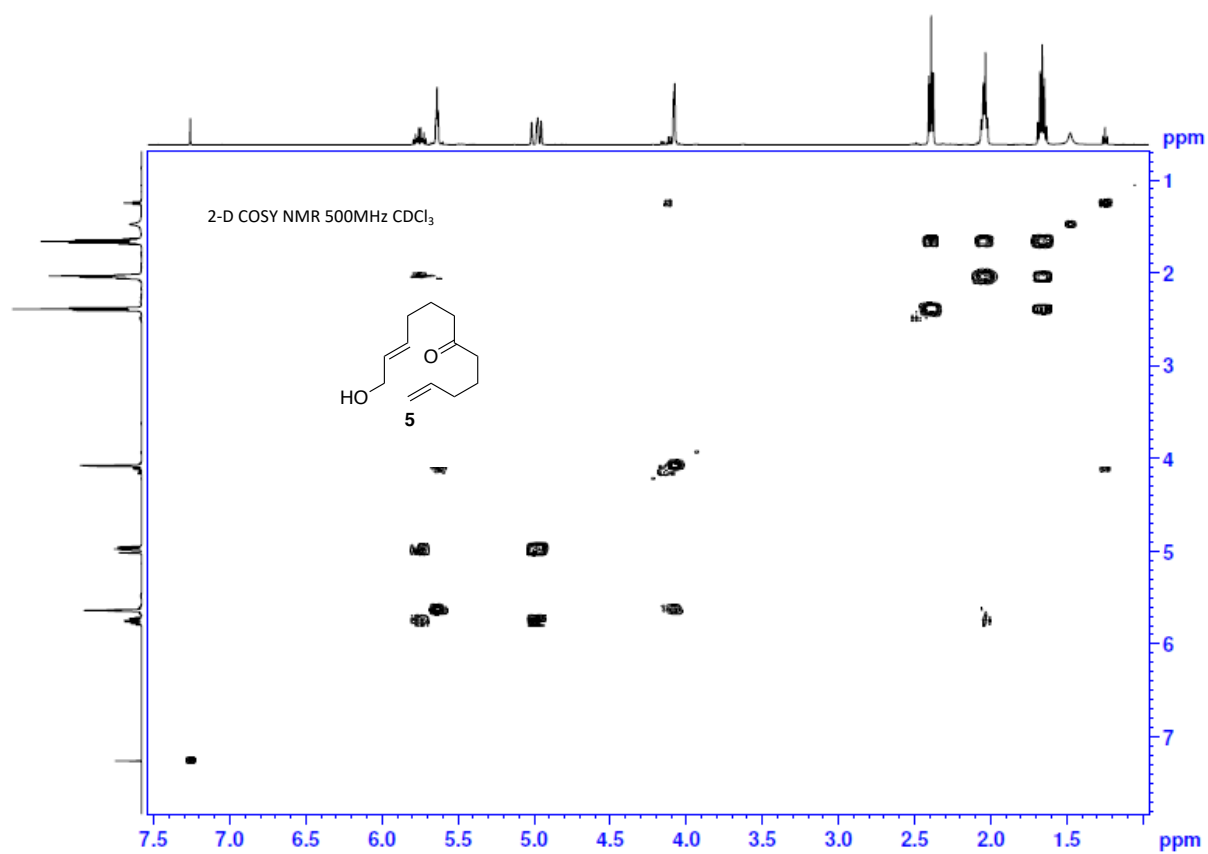

1-026 P2 1H @400MHz

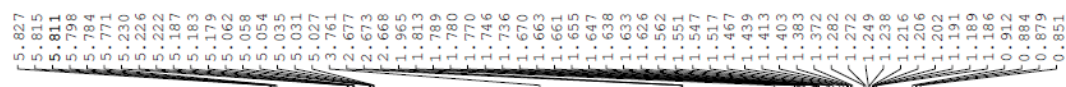

<sup>1</sup>H NMR 400MHz CDCl<sub>3</sub>

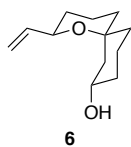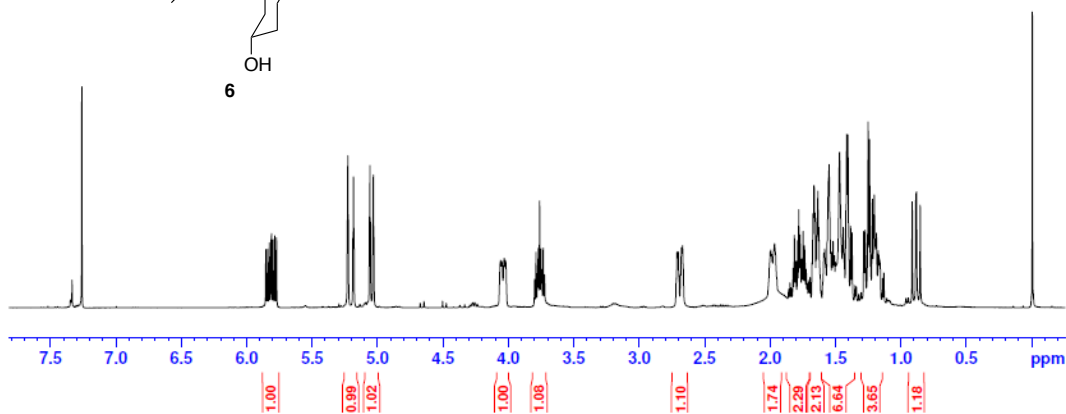

1-026 P2 (major) 13C 500MHz

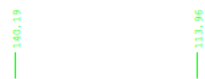

<sup>13</sup>C NMR 125MHz CDCl<sub>3</sub>

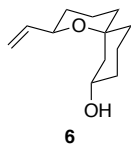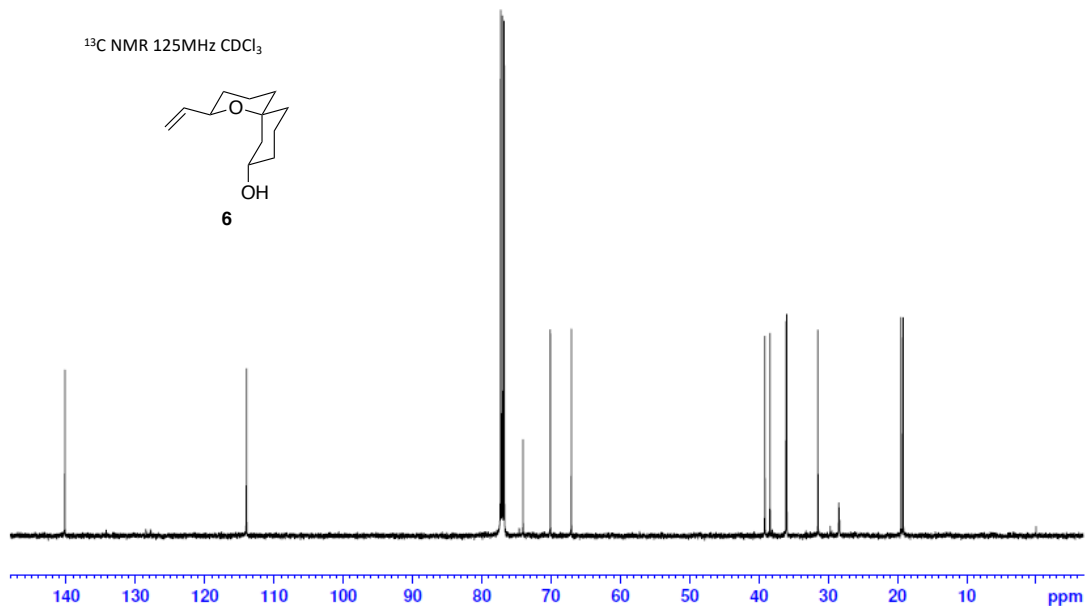

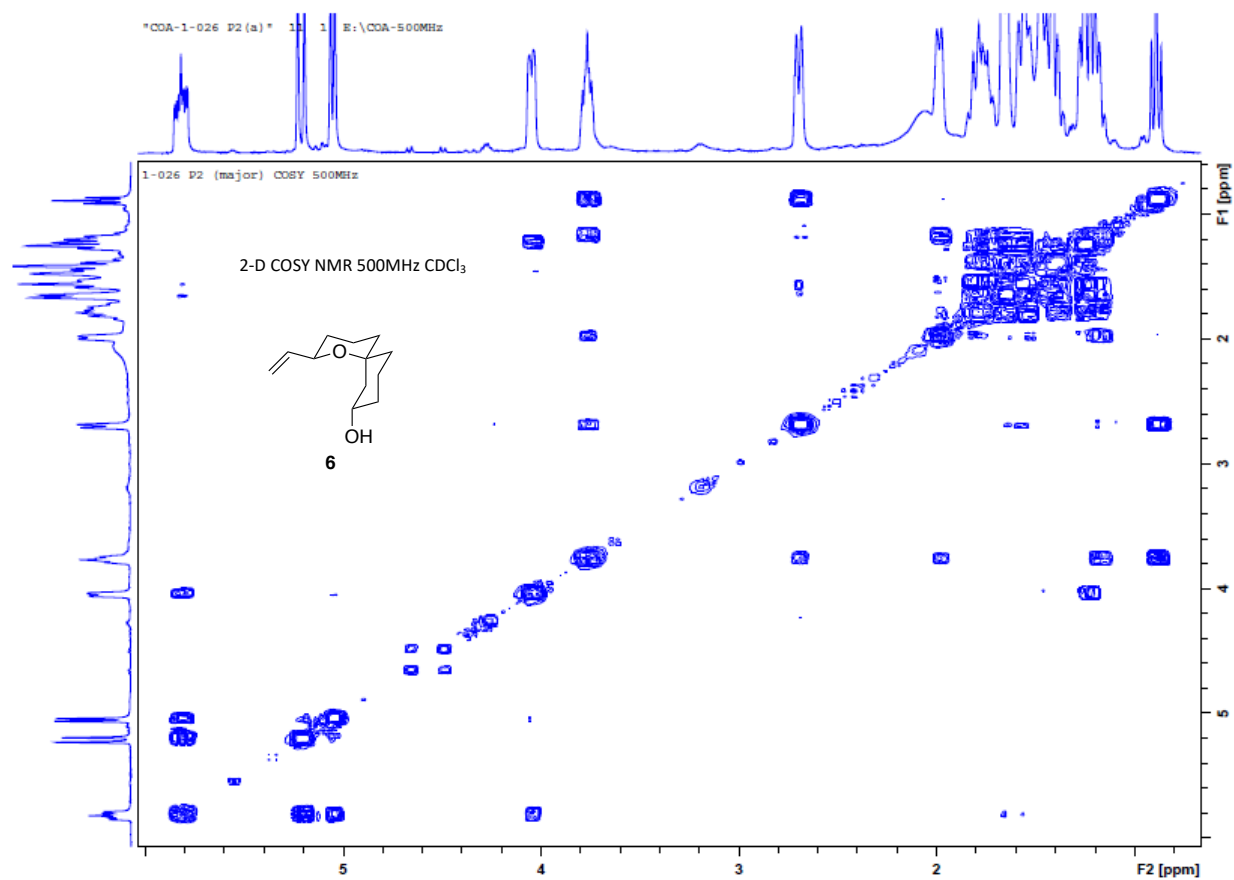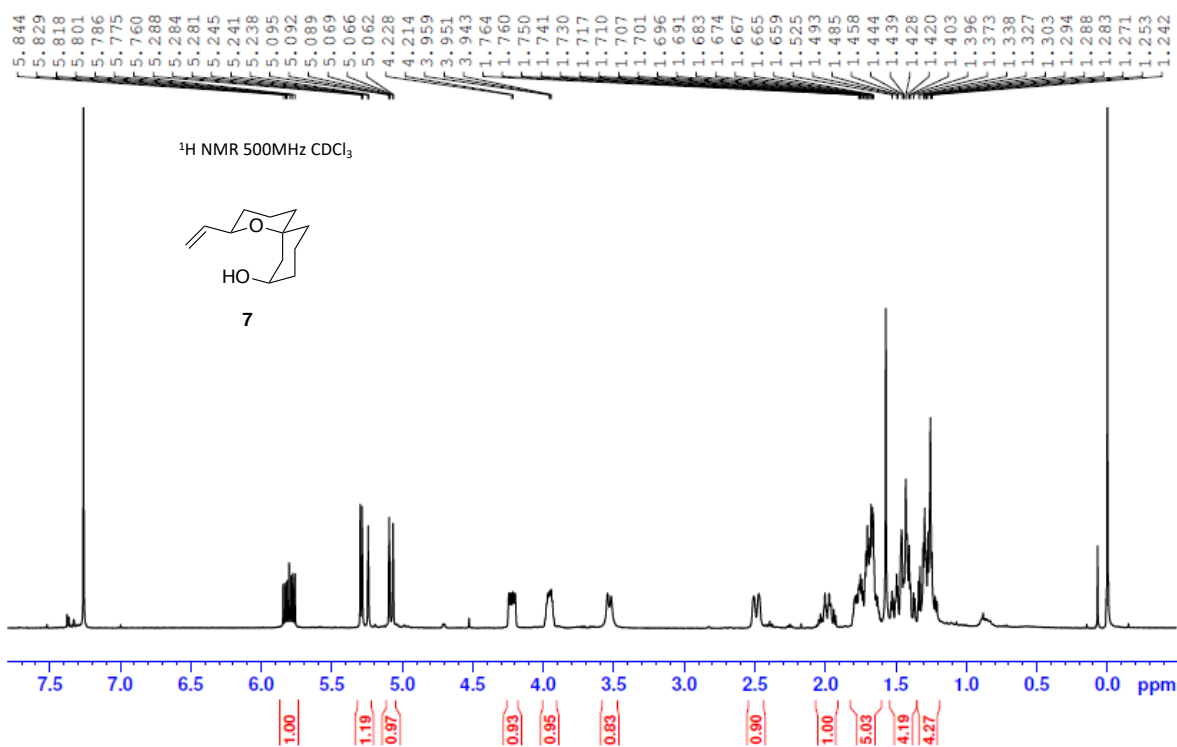

1-026 Top Spot (minor)  $^{13}\text{C}$  500MHz

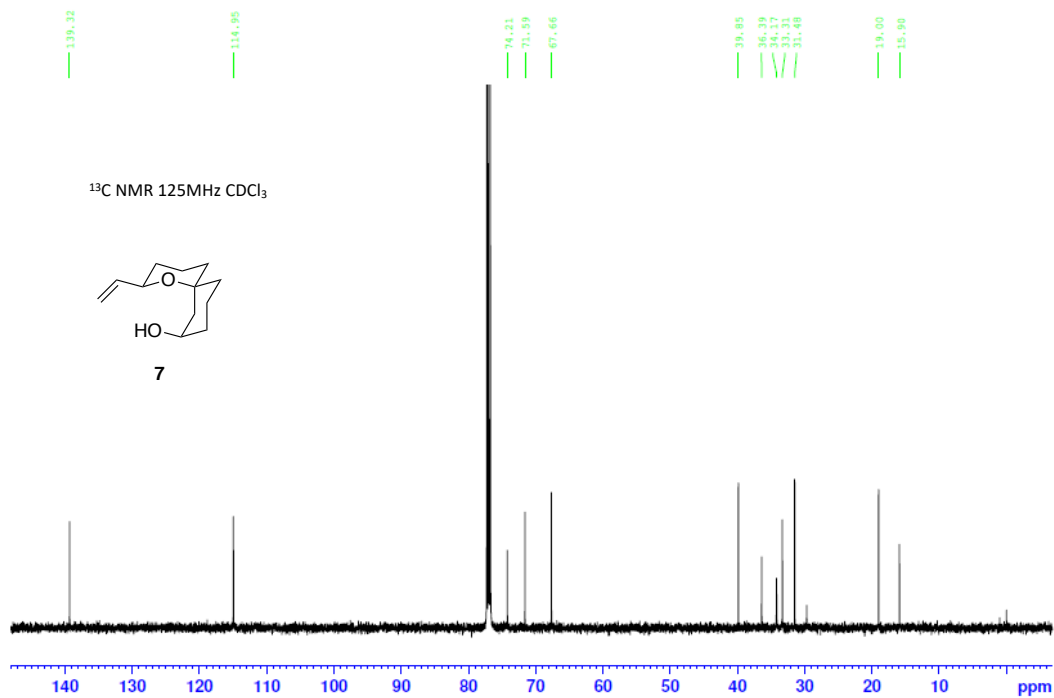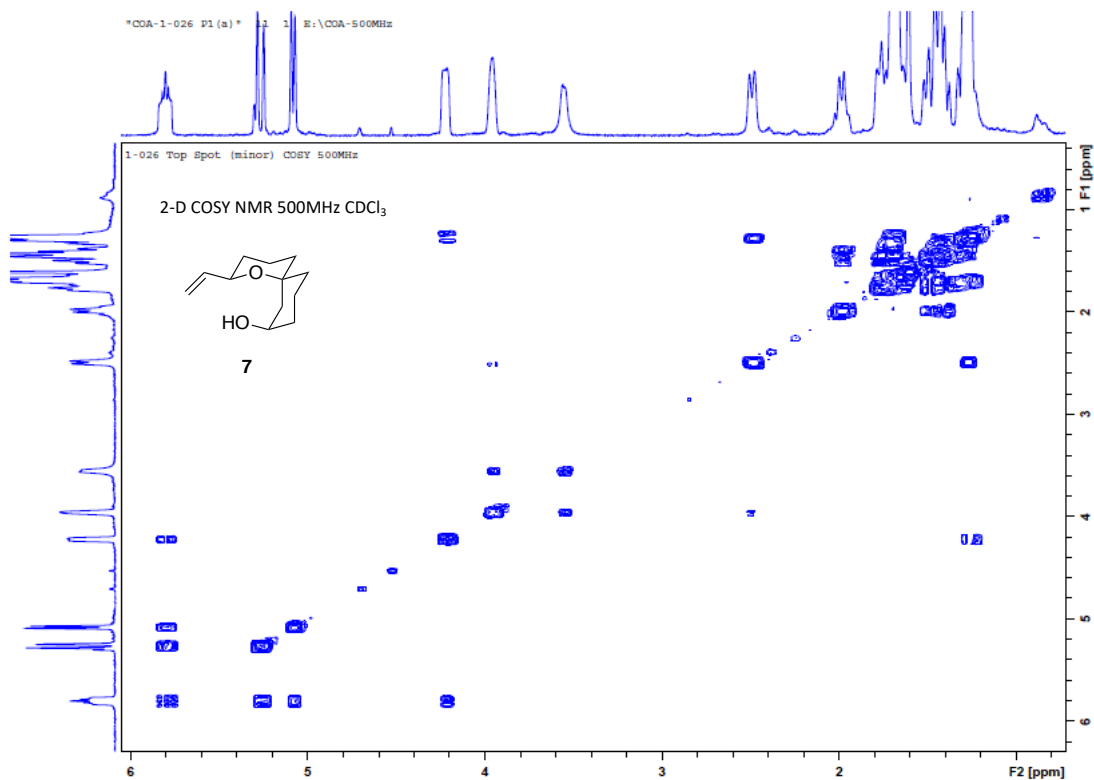

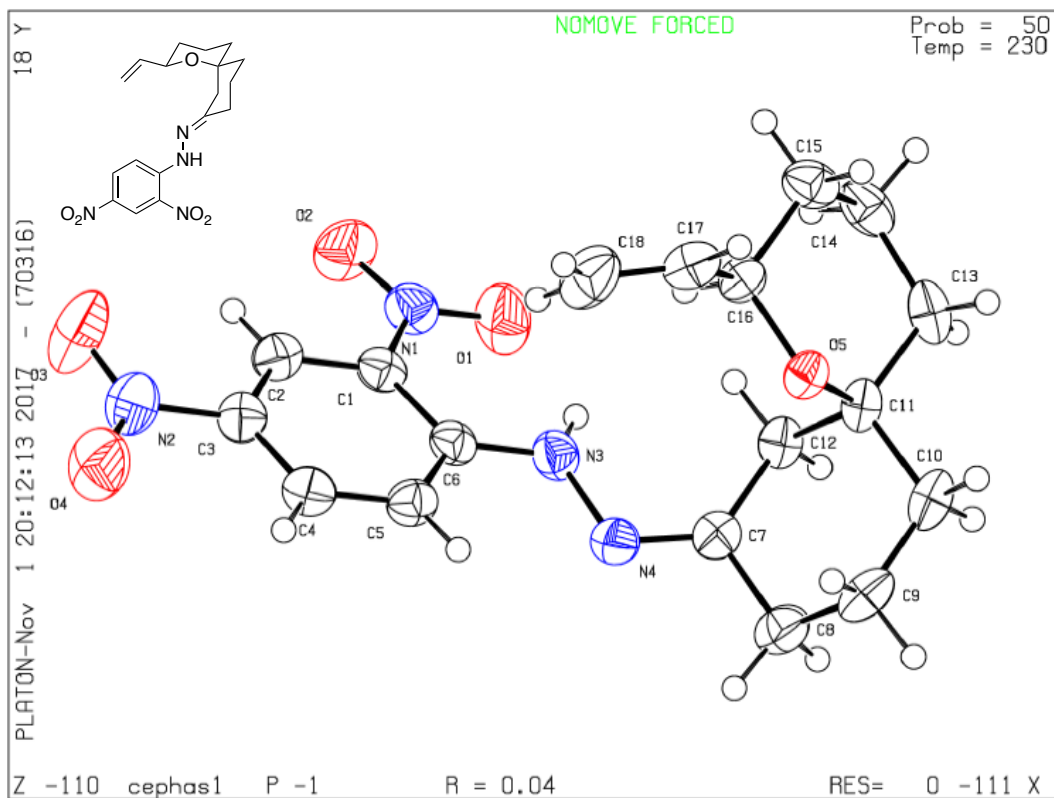

Bond precision: C-C = 0.0019 Å

Wavelength=1.54178

Cell: a=8.9124(3) b=9.5638(3) c=11.5721(4)  
alpha=78.2389(17) beta=76.9753(19) gamma=72.7914(19)  
Temperature: 230 K

|                        | Calculated    | Reported      |
|------------------------|---------------|---------------|
| Volume                 | 907.95(5)     | 907.94(5)     |
| Space group            | P -1          | P -1          |
| Hall group             | -P 1          | -P 1          |
| Moiety formula         | C18 H22 N4 O5 | ?             |
| Sum formula            | C18 H22 N4 O5 | C18 H22 N4 O5 |
| Mr                     | 374.40        | 374.39        |
| Dx, g cm <sup>-3</sup> | 1.370         | 1.369         |
| Z                      | 2             | 2             |
| Mu (mm <sup>-1</sup> ) | 0.847         | 0.847         |
| F000                   | 396.0         | 396.0         |
| F000'                  | 397.31        |               |
| h,k,lmax               | 10,11,13      | 10,11,13      |
| Nref                   | 3335          | 3244          |
| Tmin,Tmax              | 0.850,0.903   | 0.750,0.910   |
| Tmin'                  | 0.844         |               |

Correction method= # Reported T Limits: Tmin=0.750 Tmax=0.910  
AbsCorr = MULTI-SCAN

Data completeness= 0.973 Theta(max)= 68.440

R(reflections)= 0.0355( 2931) wR2(reflections)= 0.1248( 3244)

S = 1.488 Npar= 332

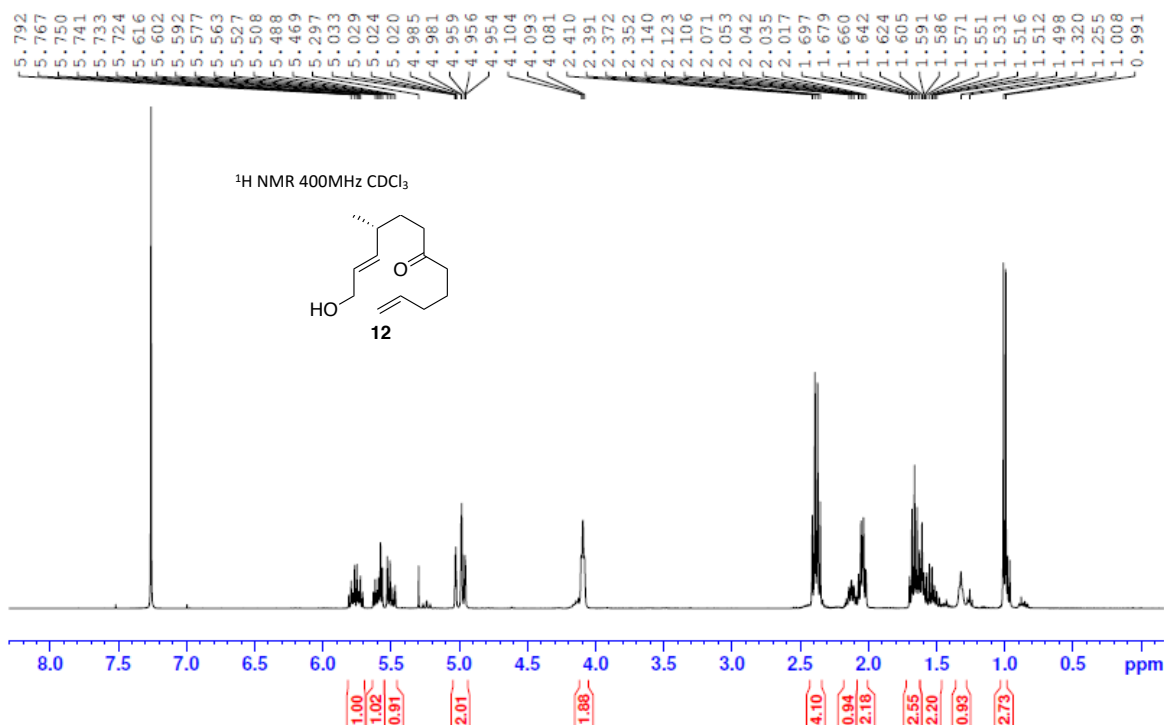

TBS Deprot. Final Substrate 400AP CDCl<sub>3</sub>

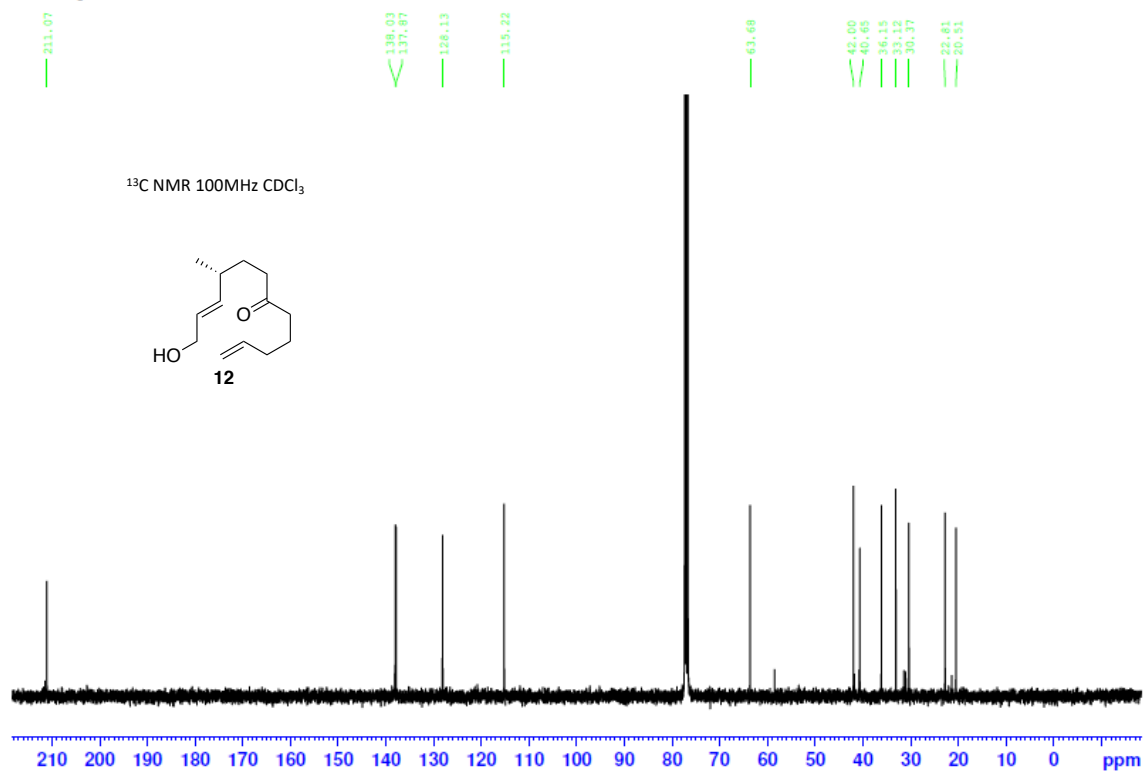

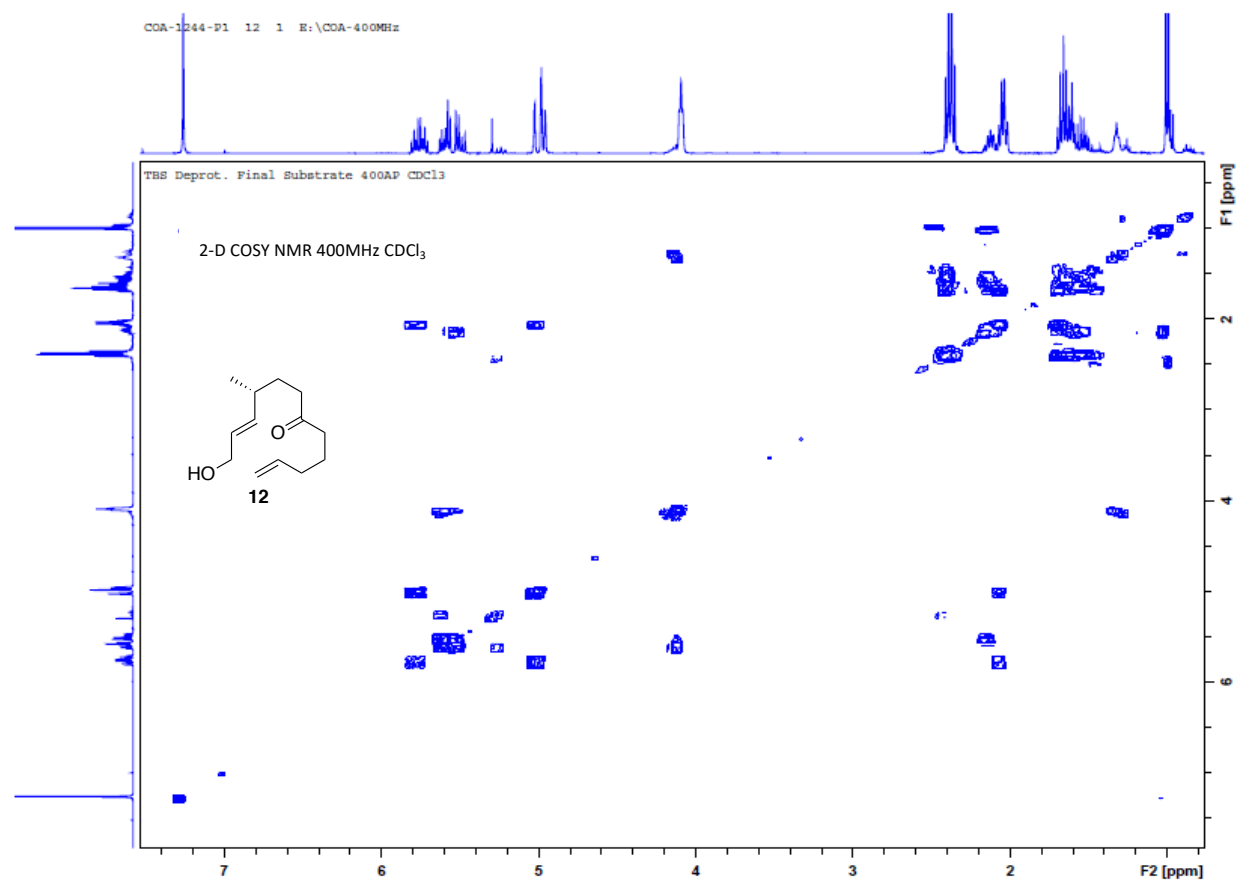

Unimolecular Screening 500 AP CDCl<sub>3</sub>

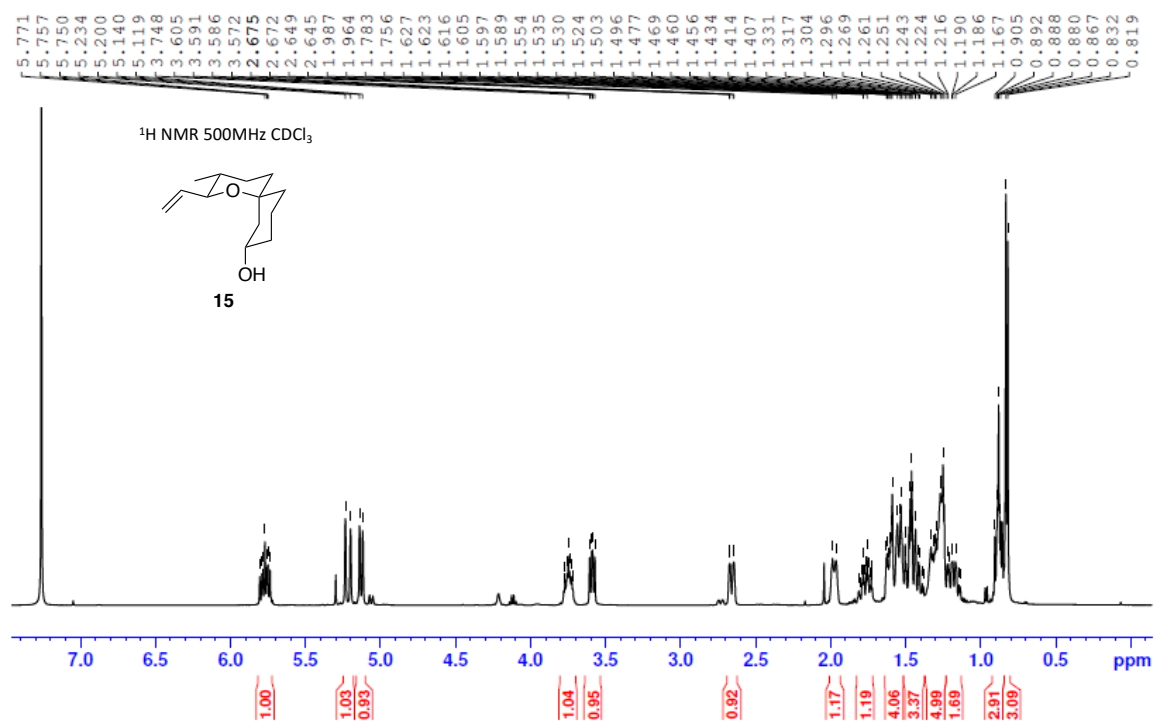

Unimolecular Screening 500 AP CDCl<sub>3</sub>

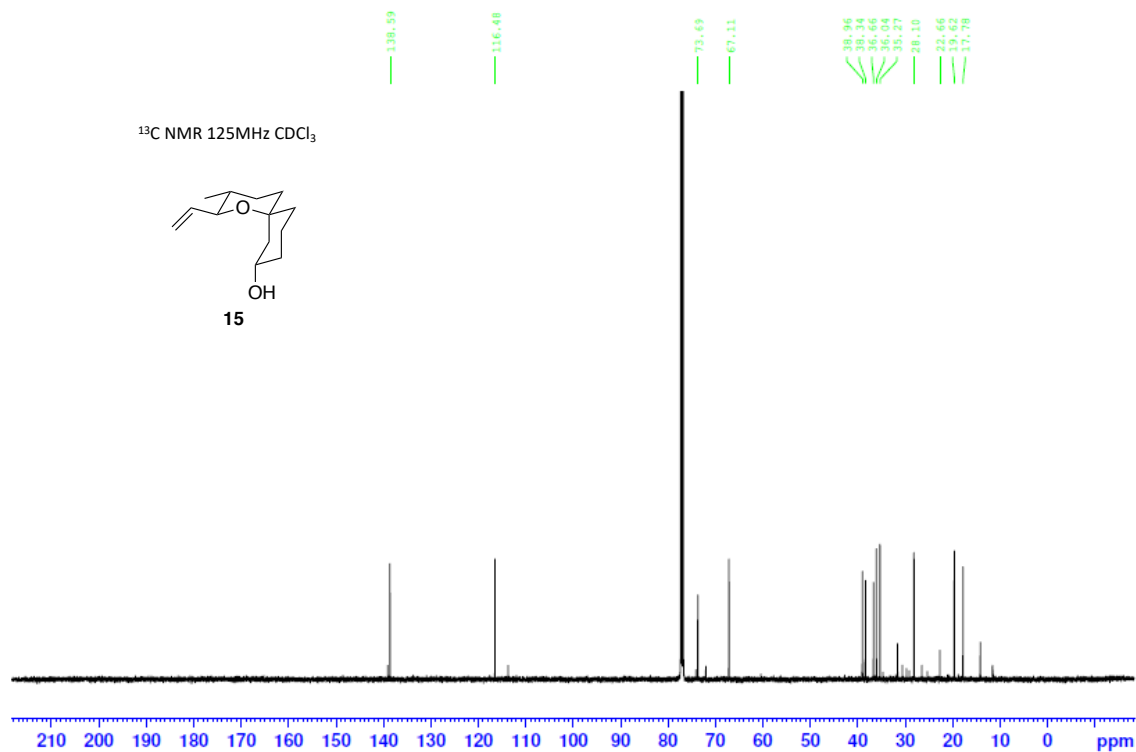



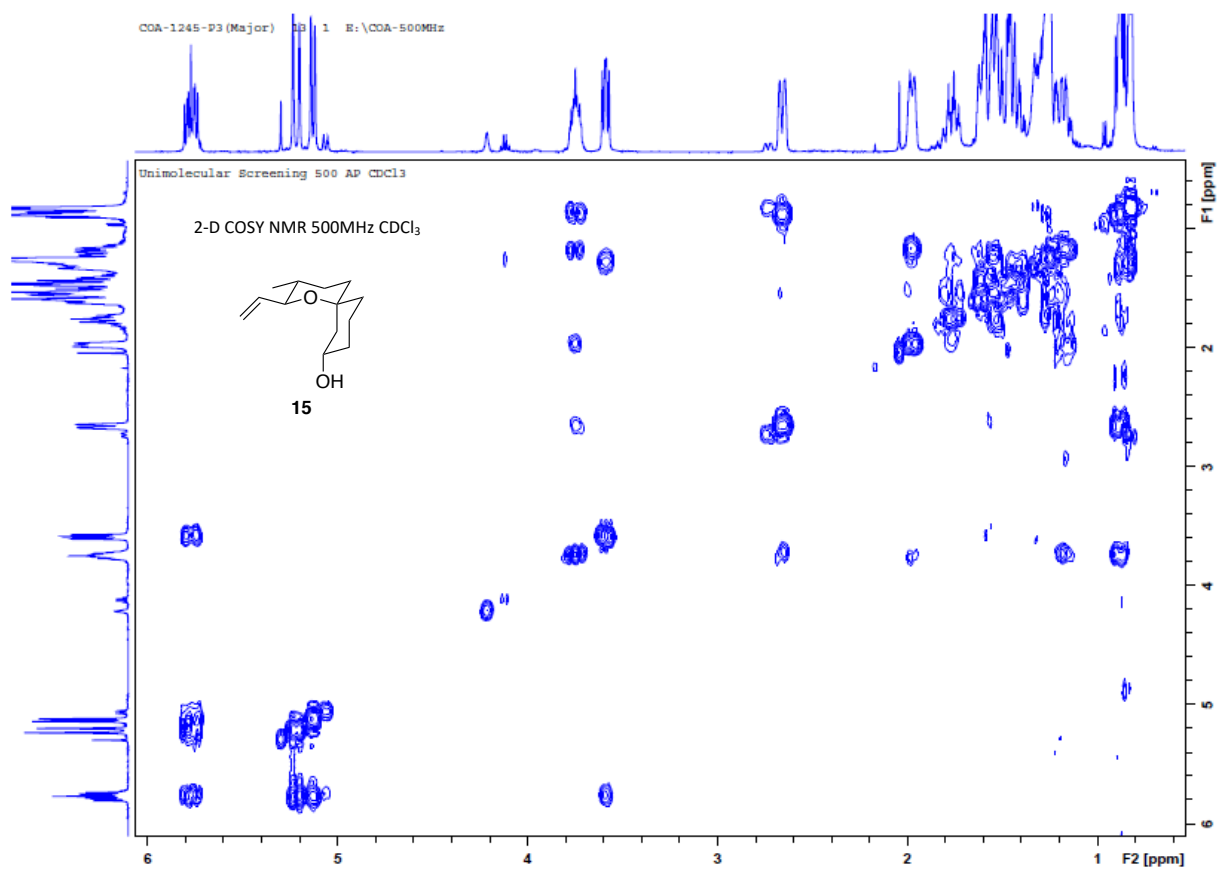

Minor product - Re2O7 Intra. 500AP

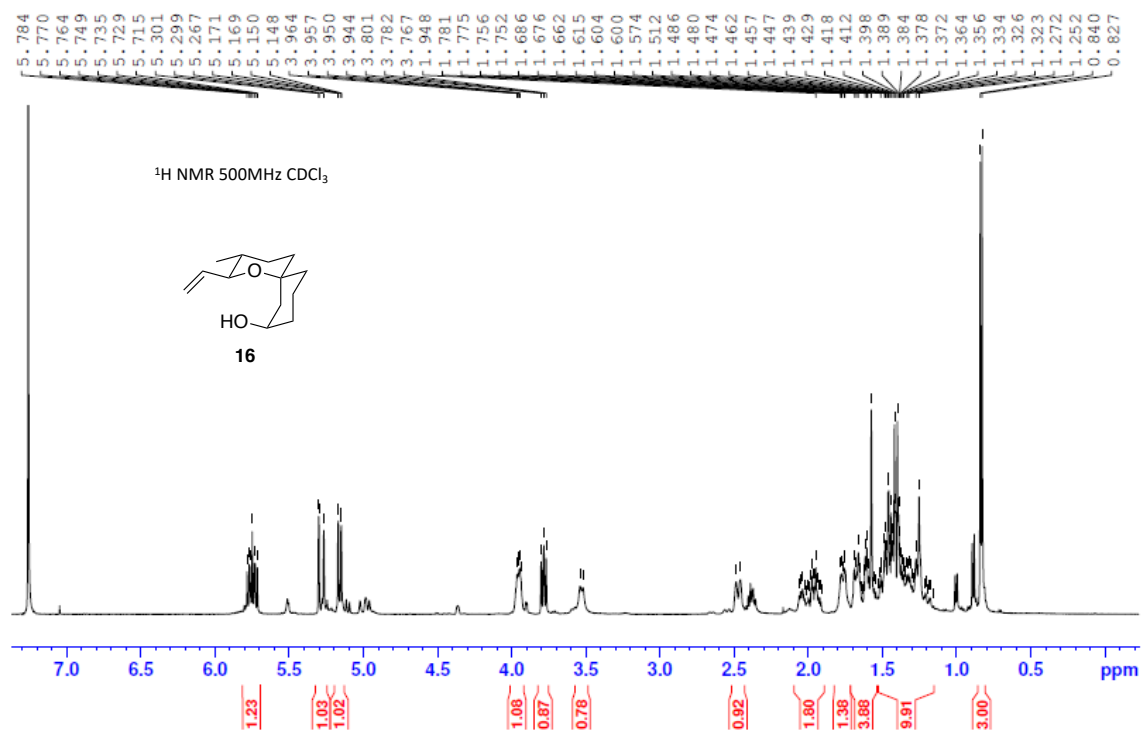

Minor product - Re2O7 Intra. 500AP

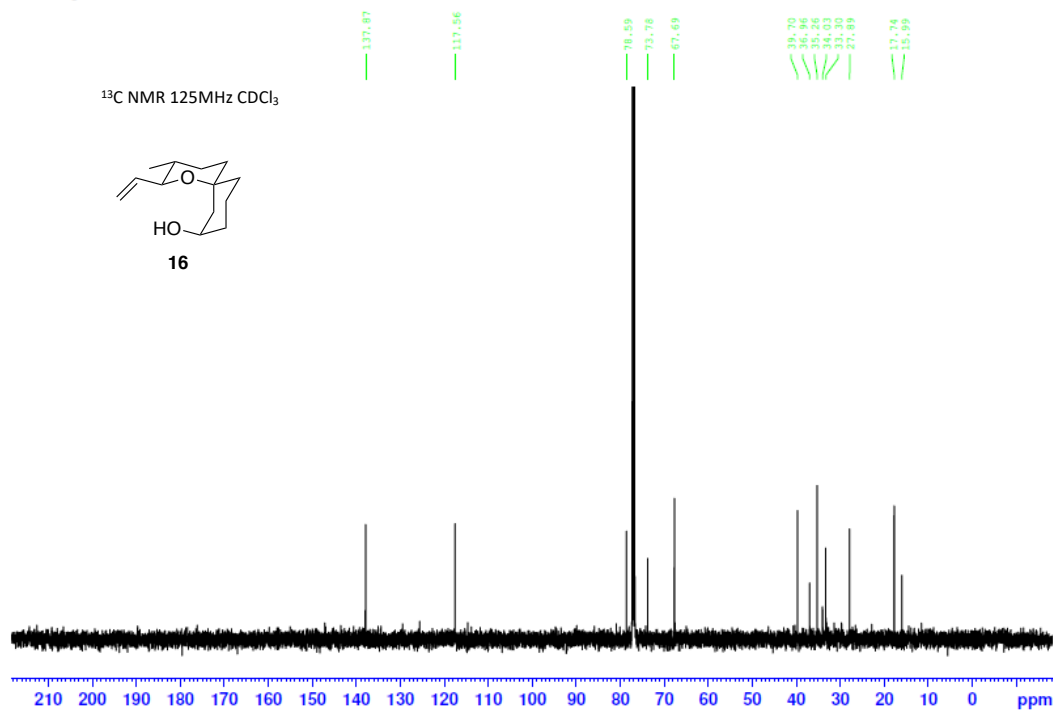

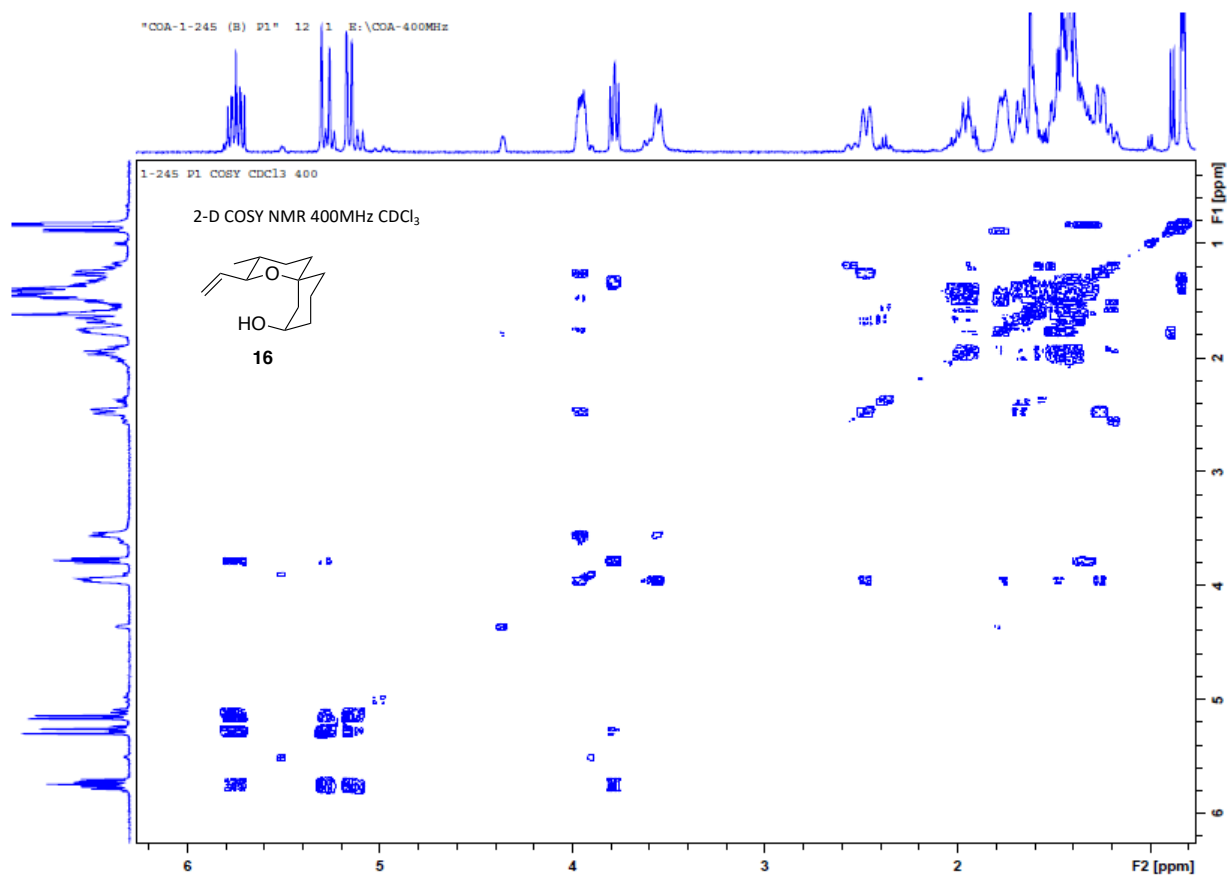

2-144 <sup>1</sup>H

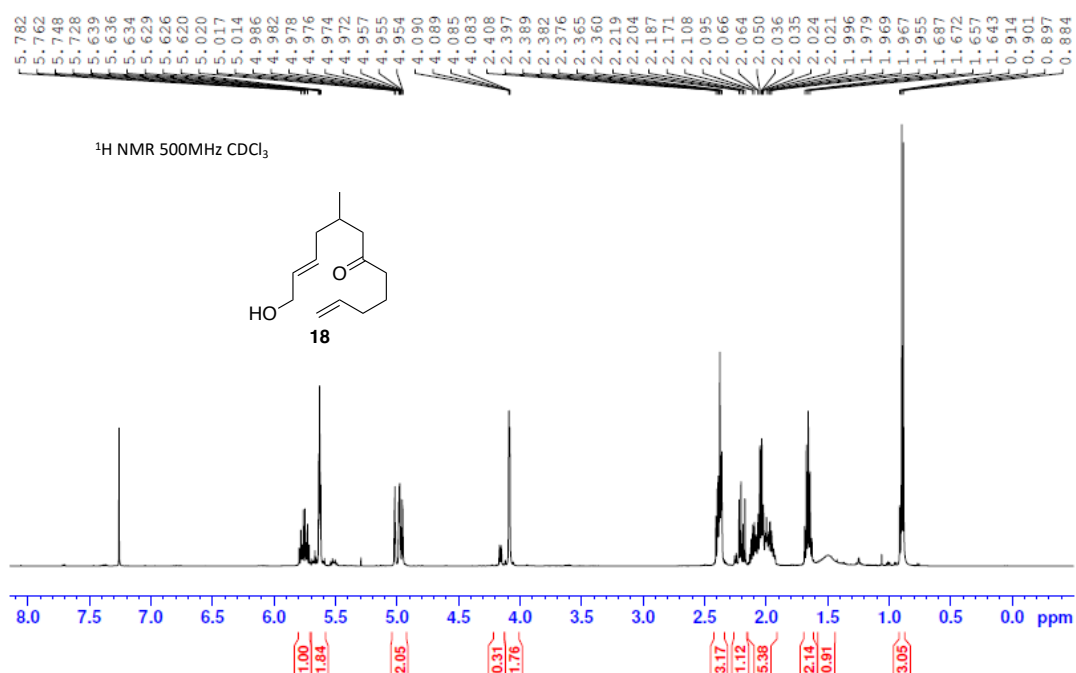

2-144 <sup>13</sup>C

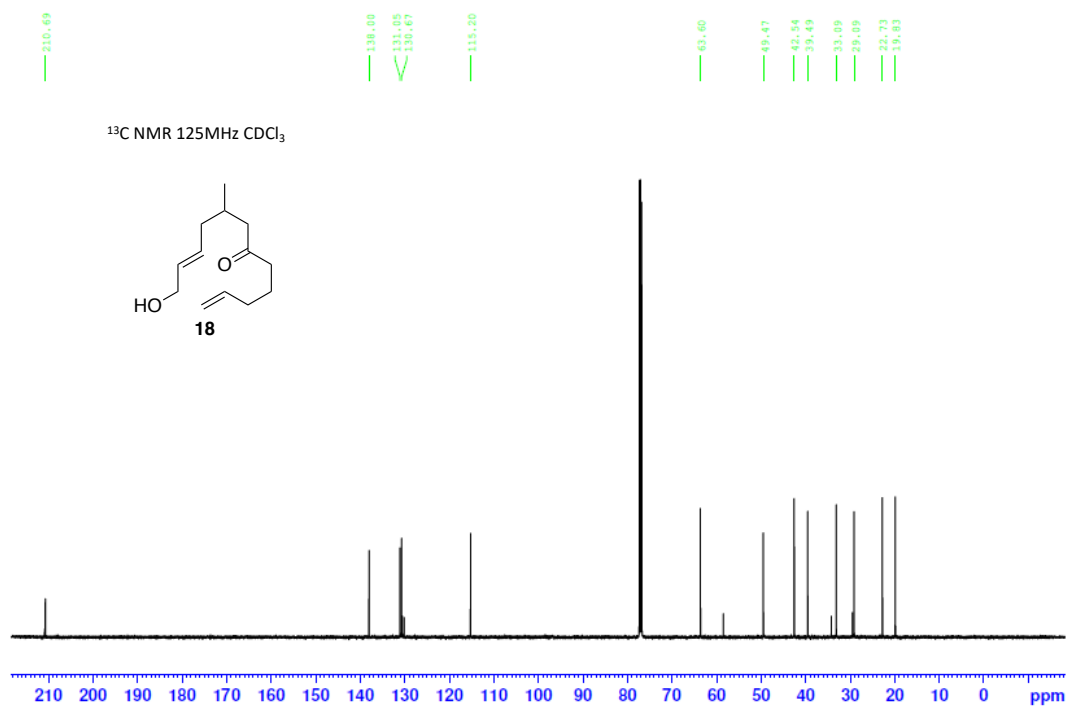

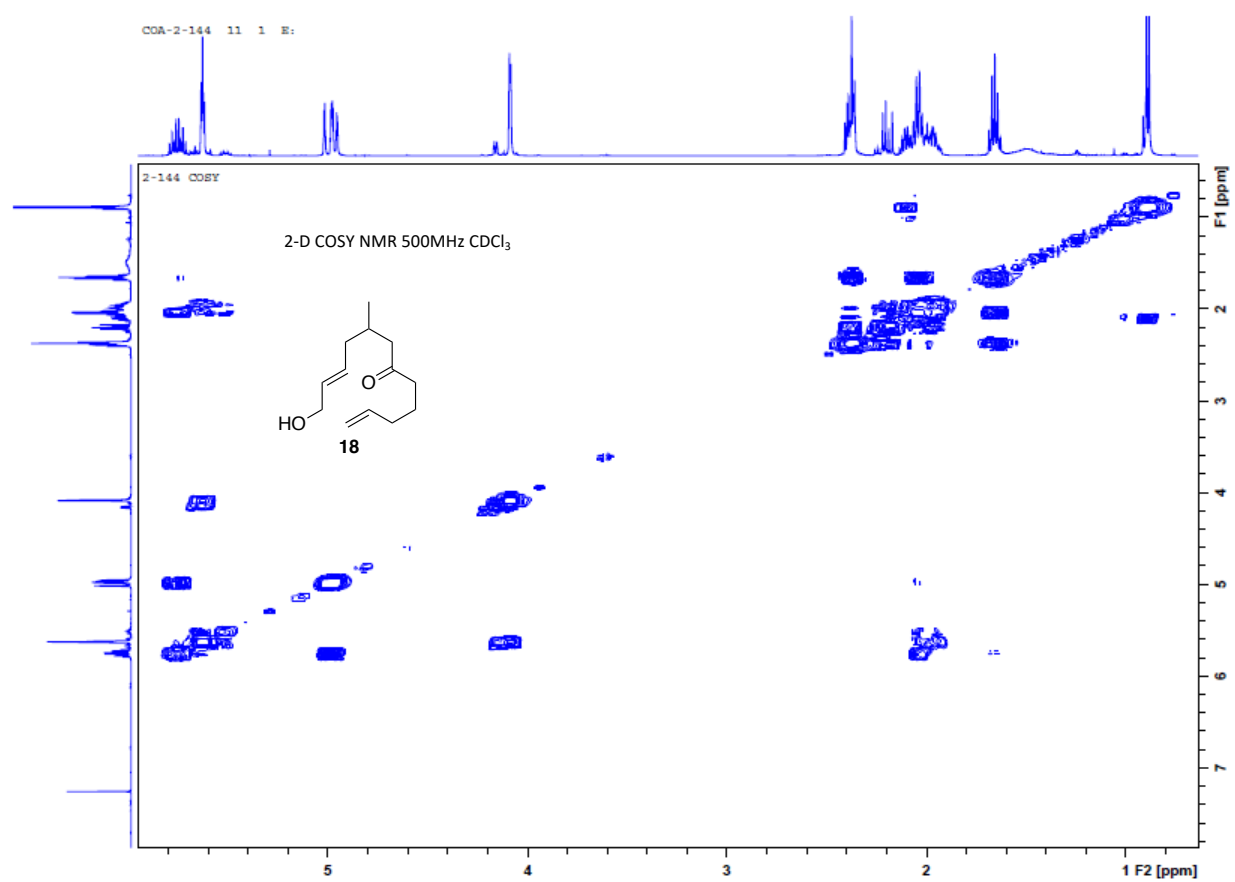

2-145 P2 1H

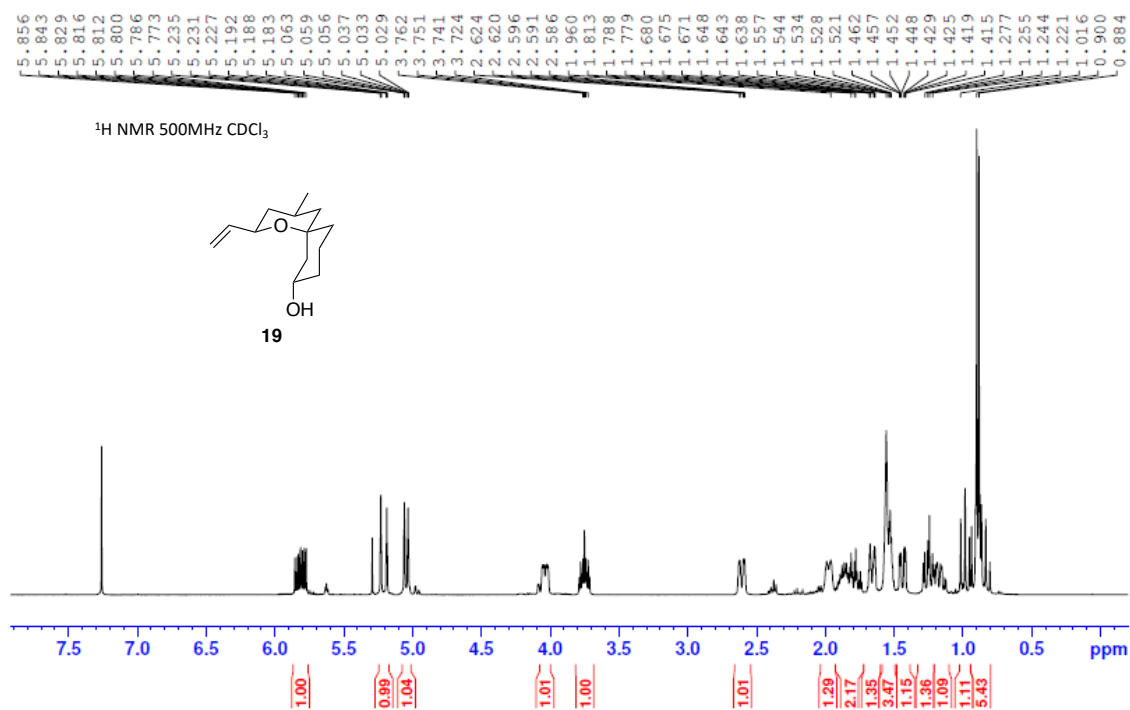

2-145 P2 13C

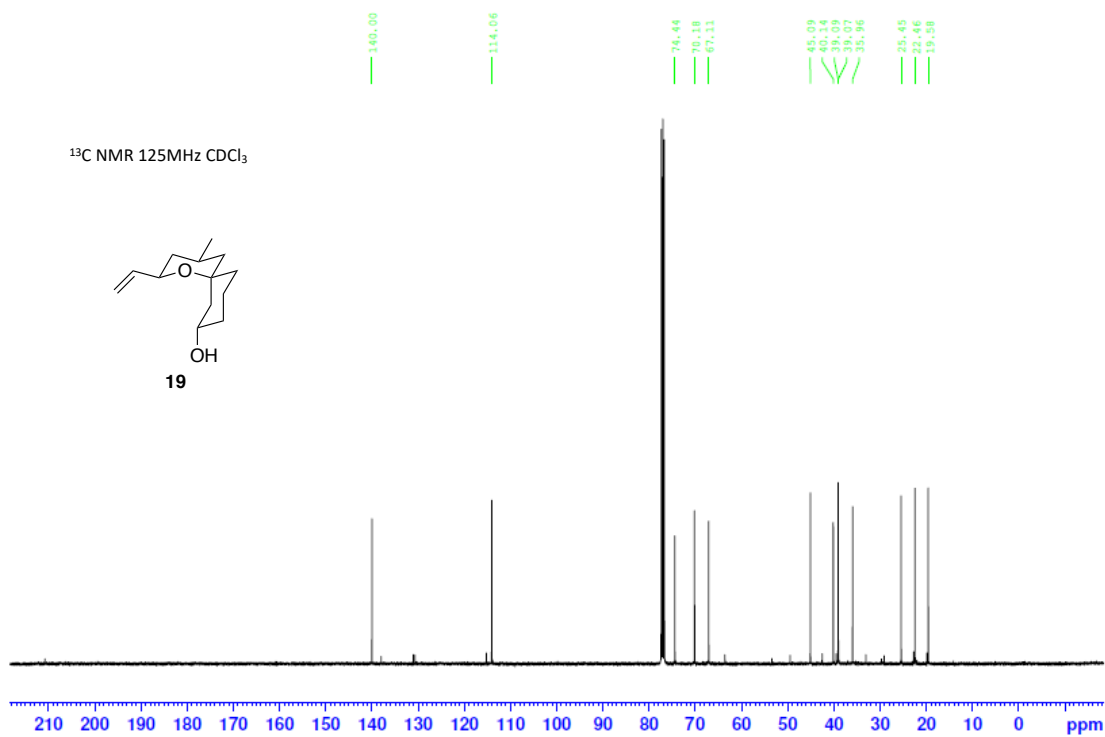

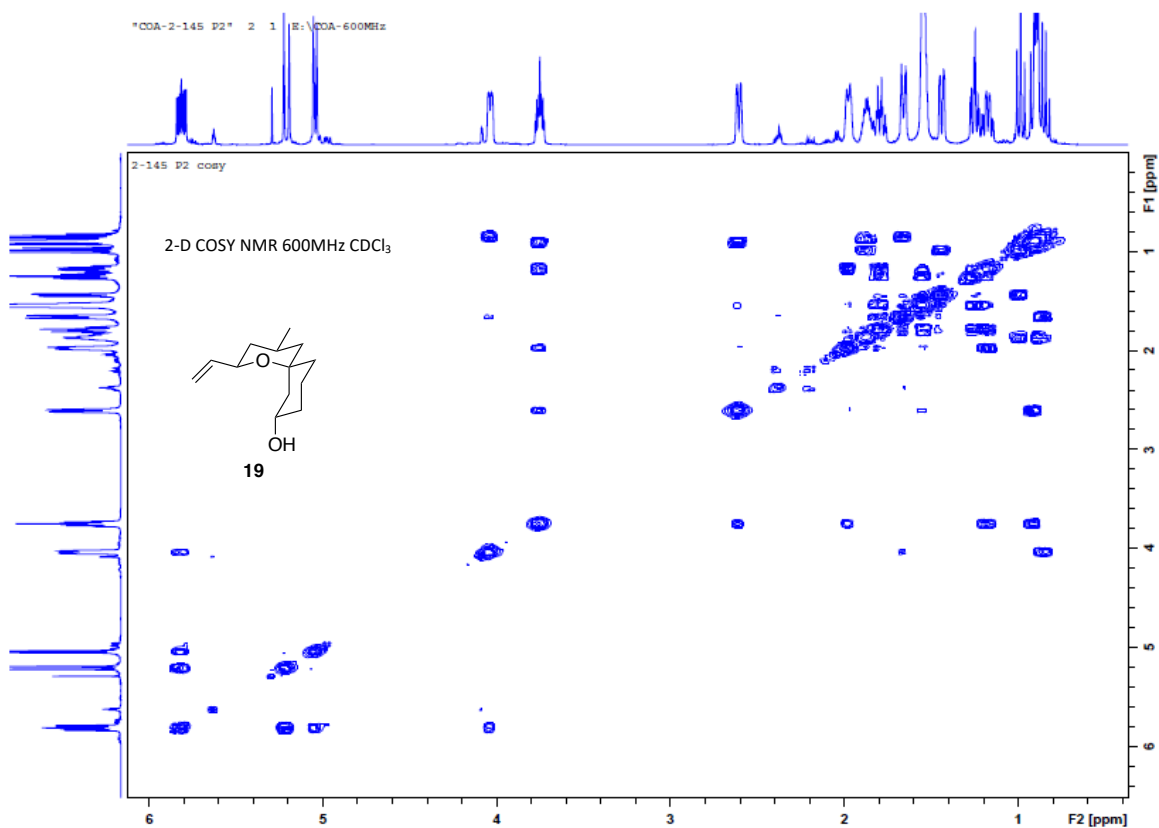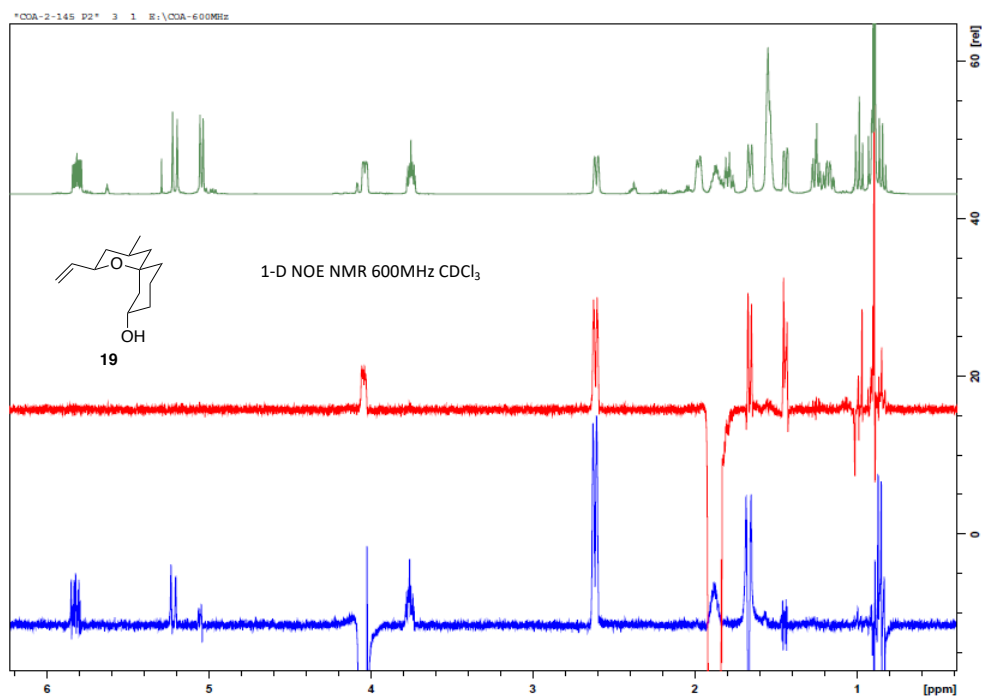

2-145 P1 1H

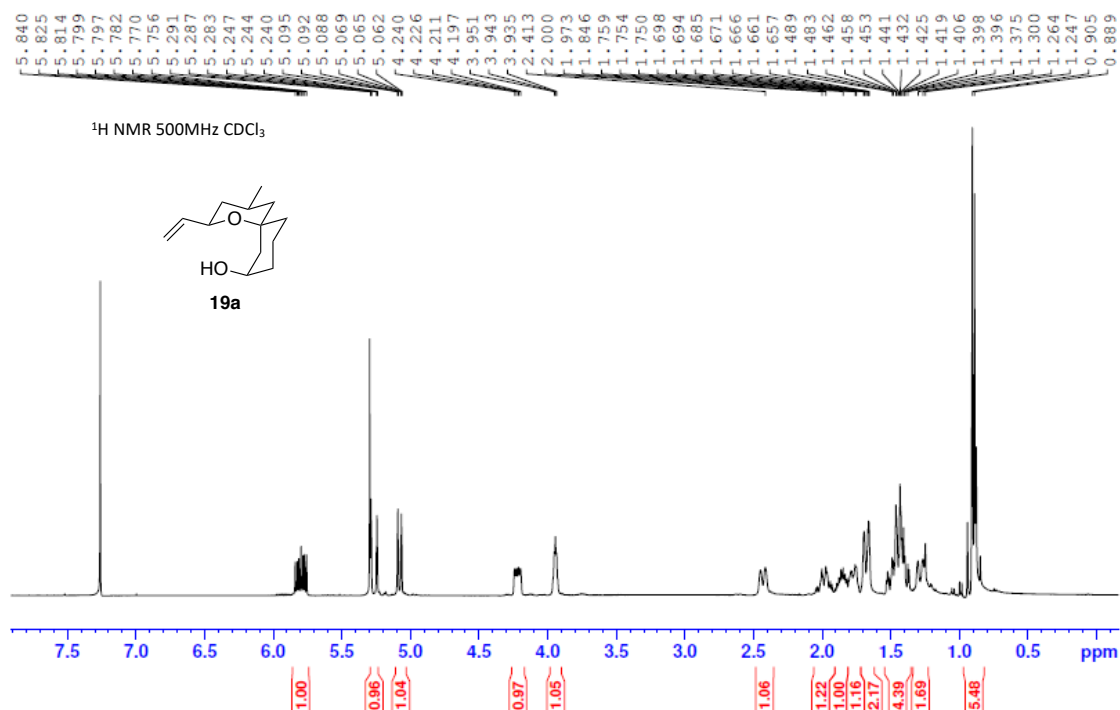

2-145 P1 13C

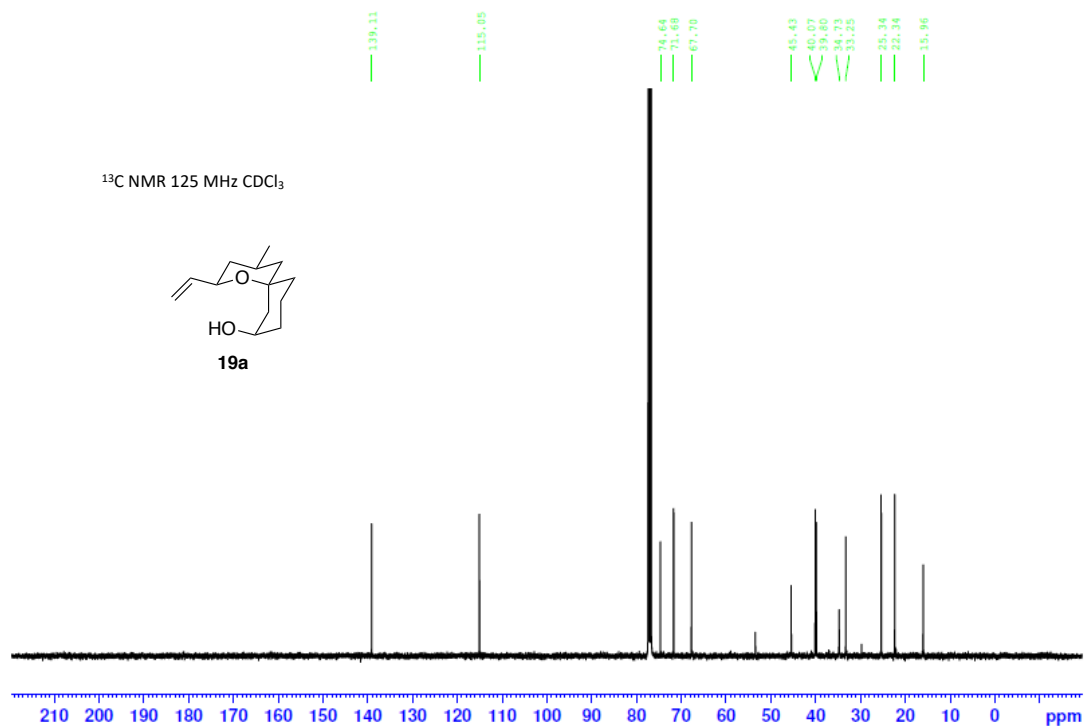



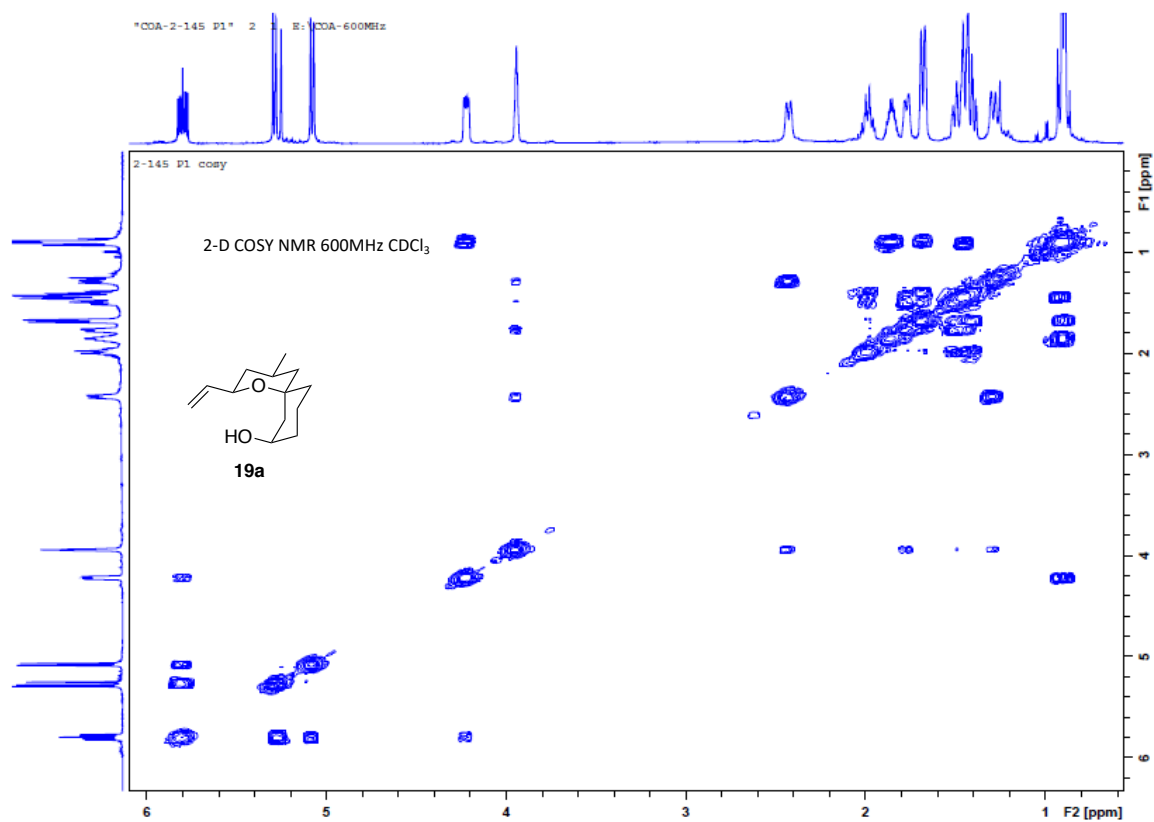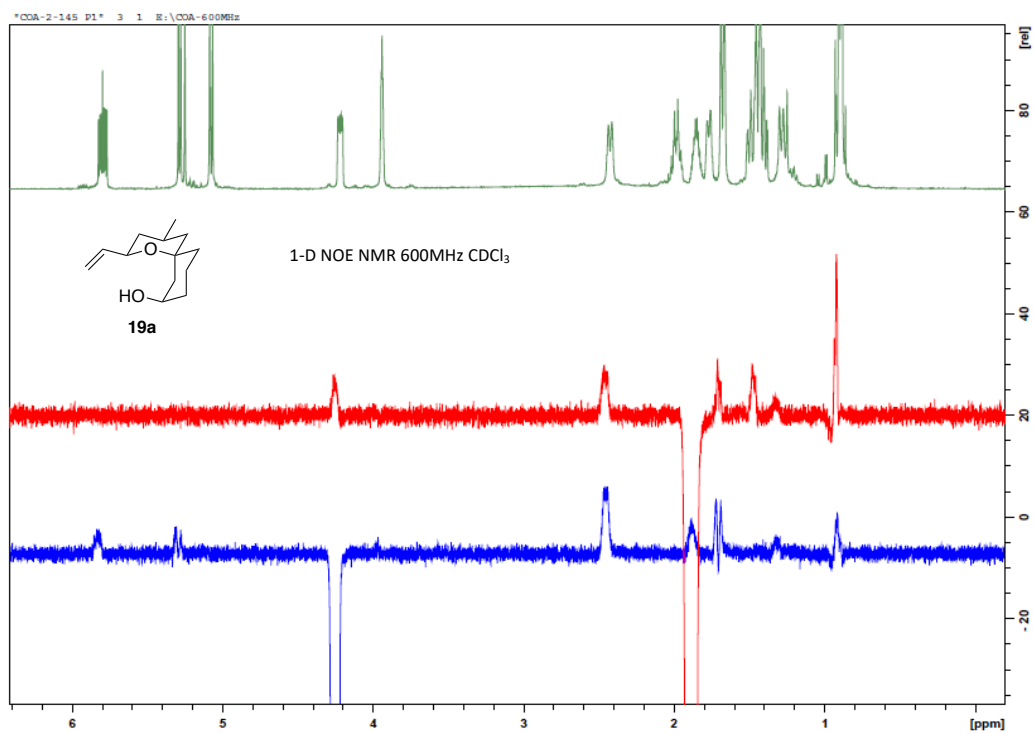

Substrate (3) p2-020 1H 400P CDCl<sub>3</sub>

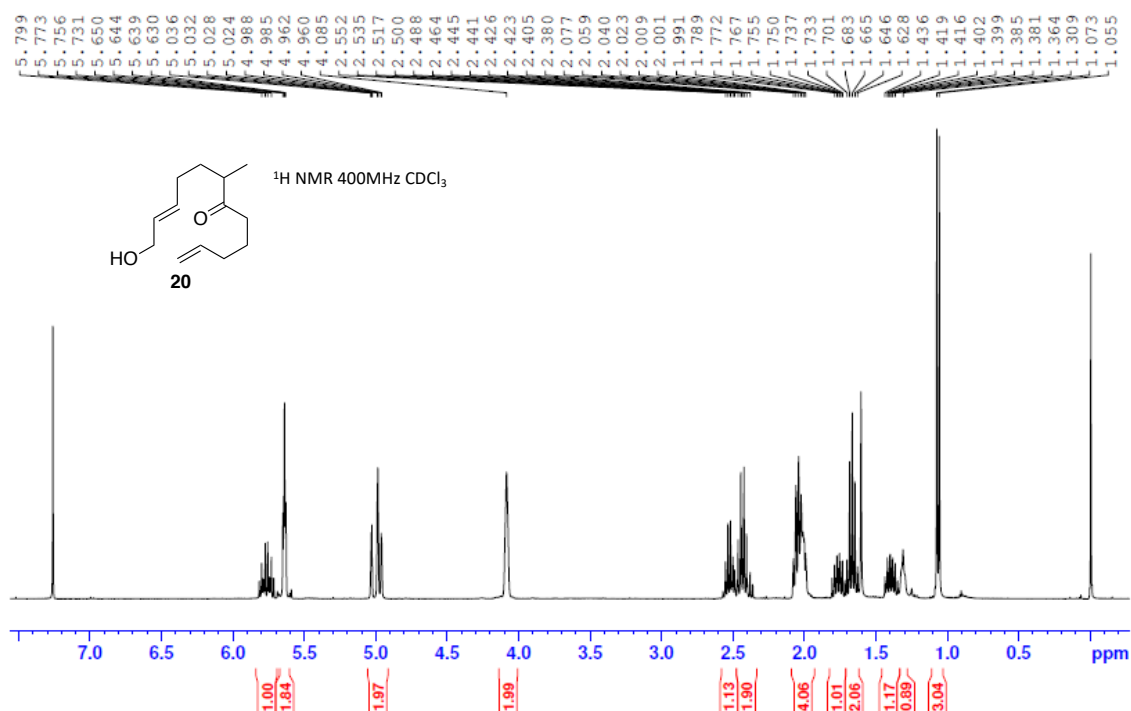

Substrate (3) p2-020 400P CDCl<sub>3</sub>

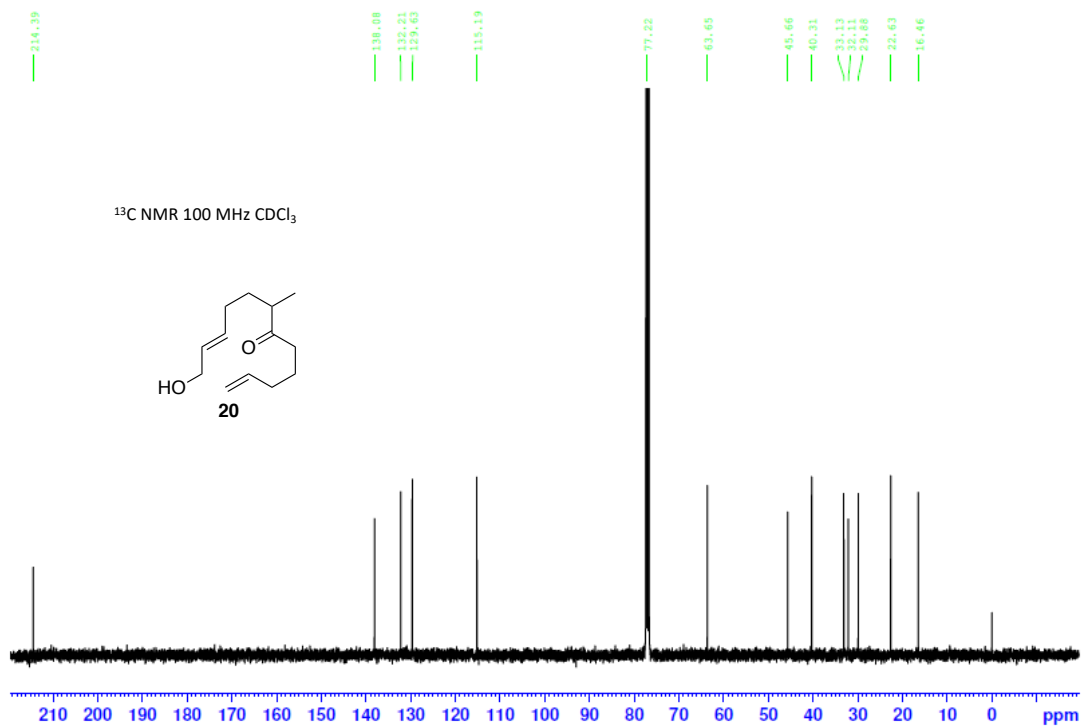

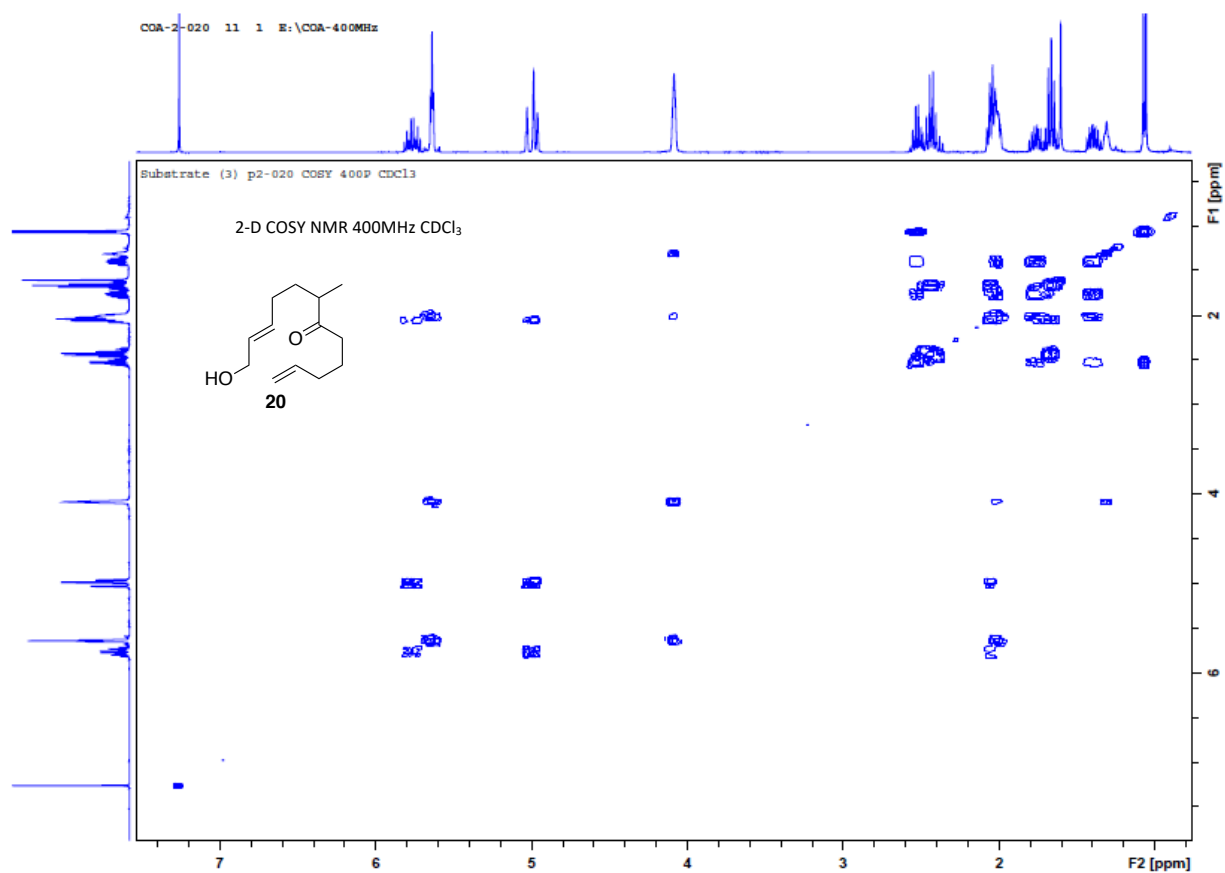

<sup>1</sup>H NMR @ 600MHz

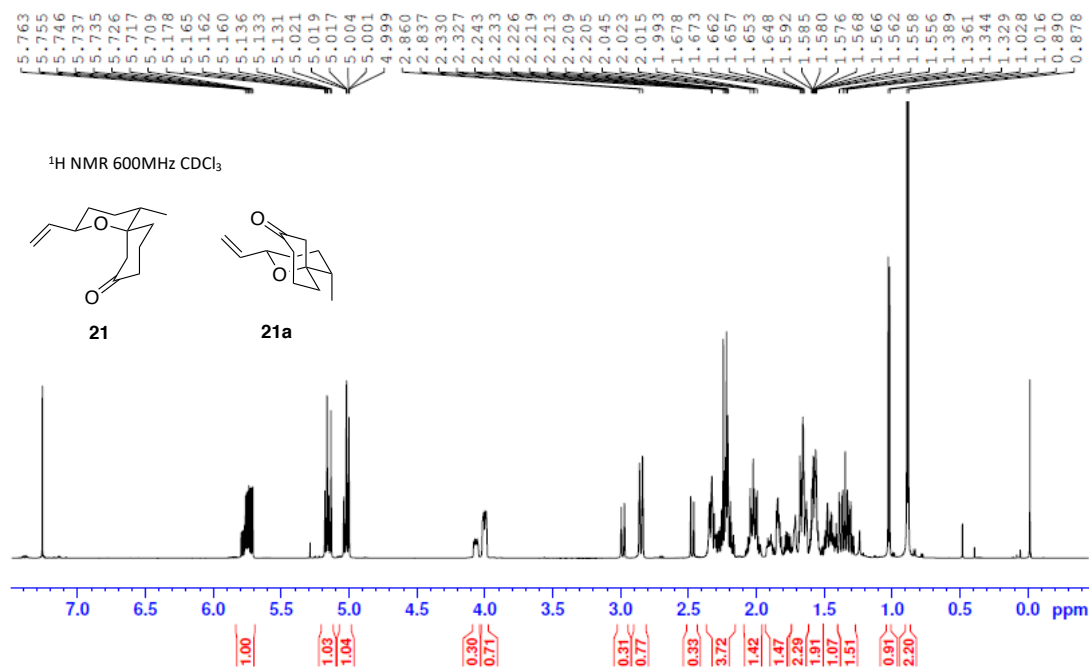

2-023 Oxidation <sup>13</sup>C CDCl<sub>3</sub> 500P

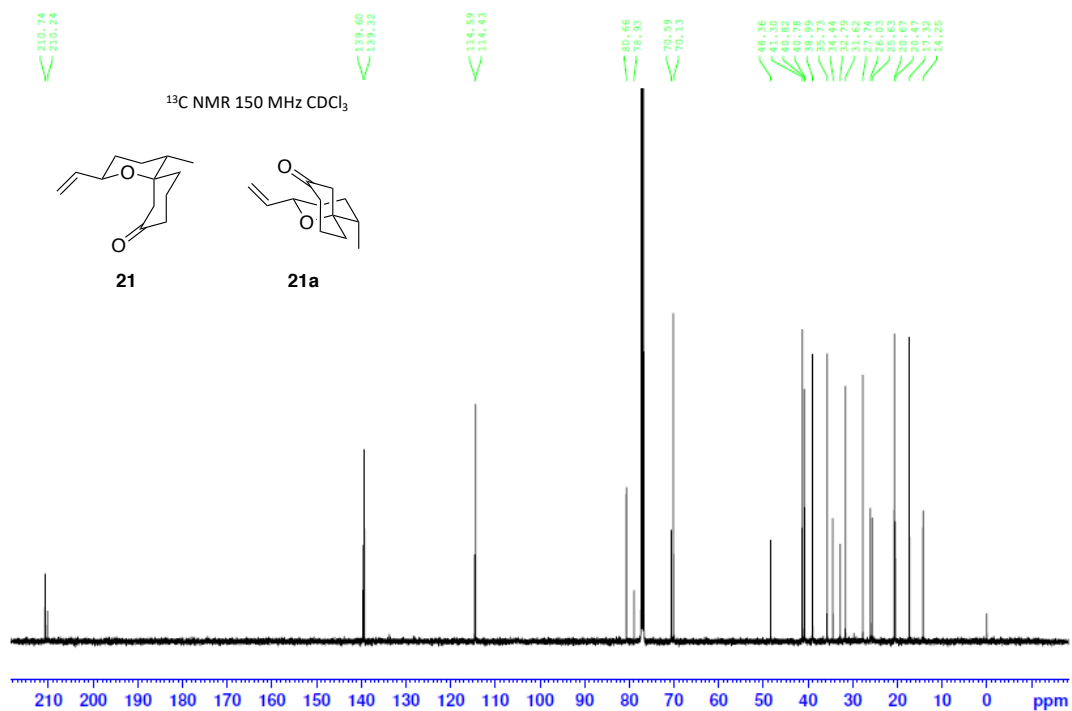

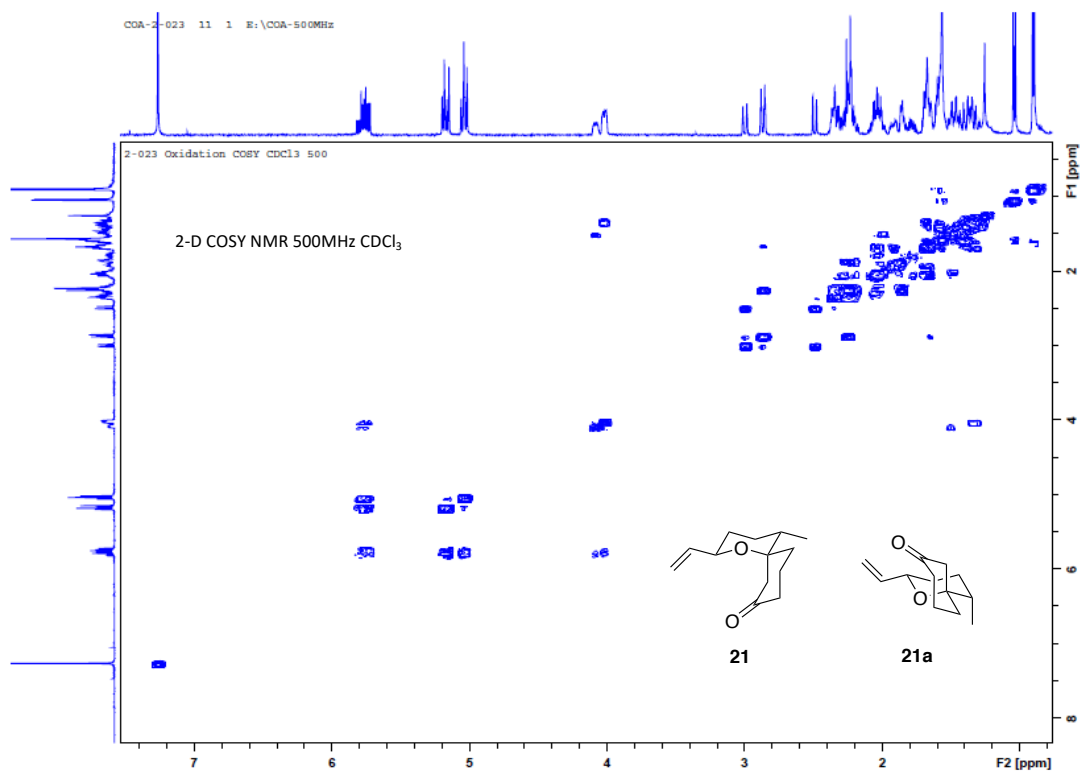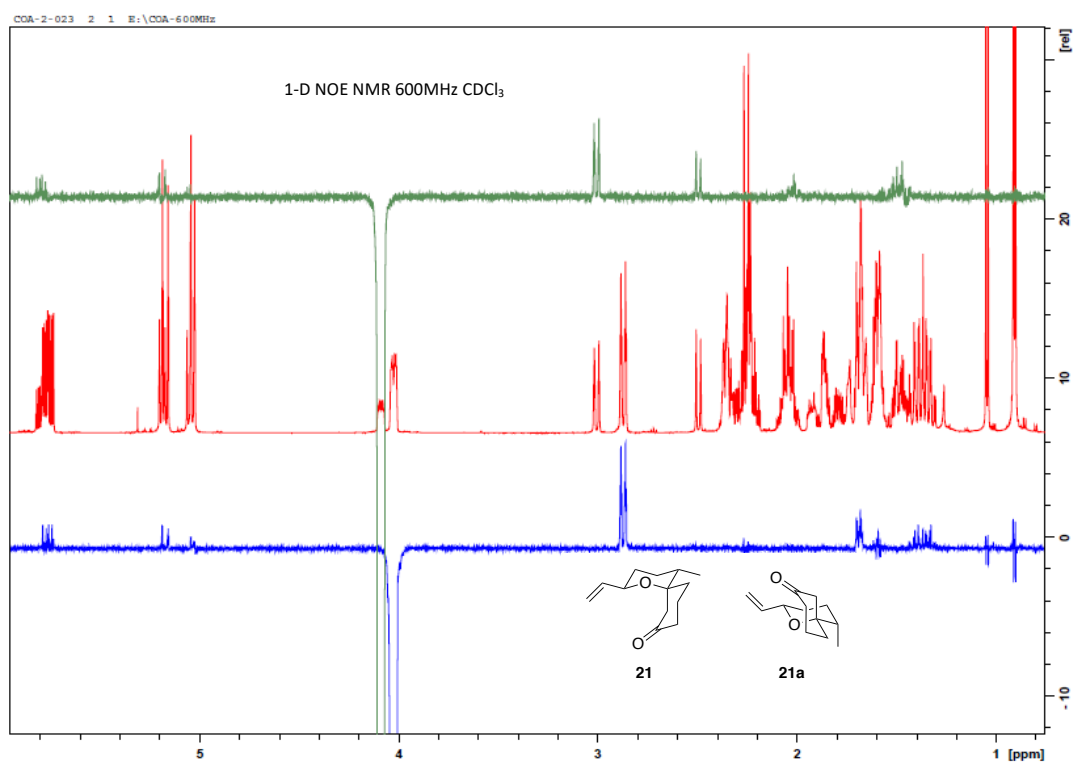

2-043 1H 500MHz

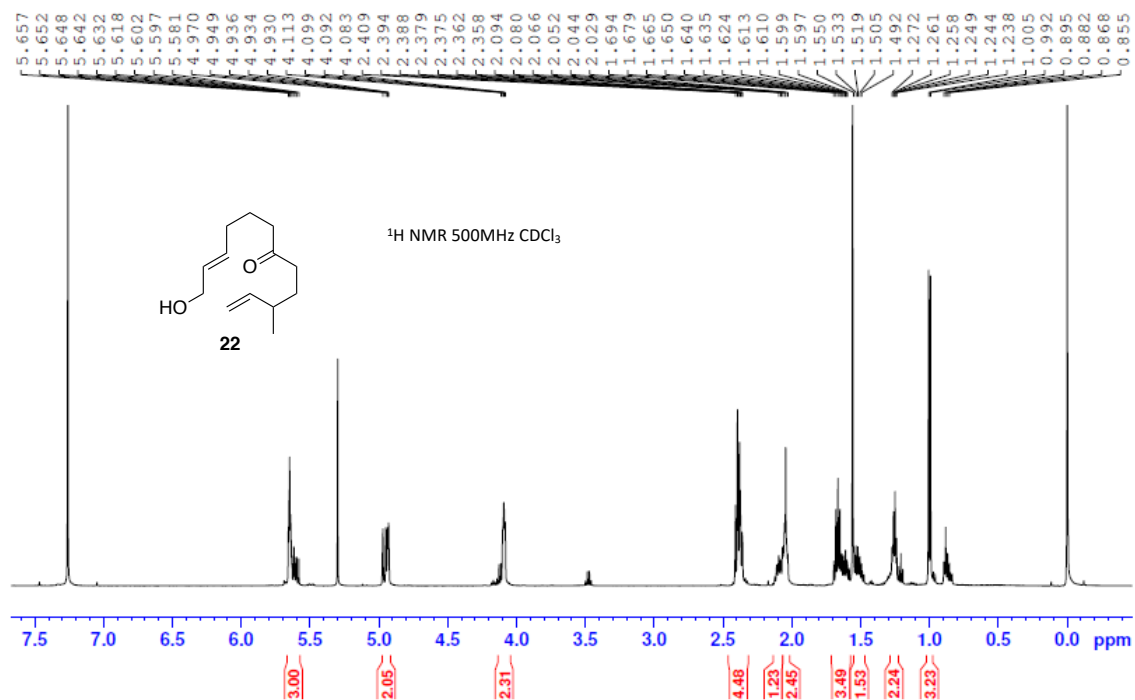

2-043

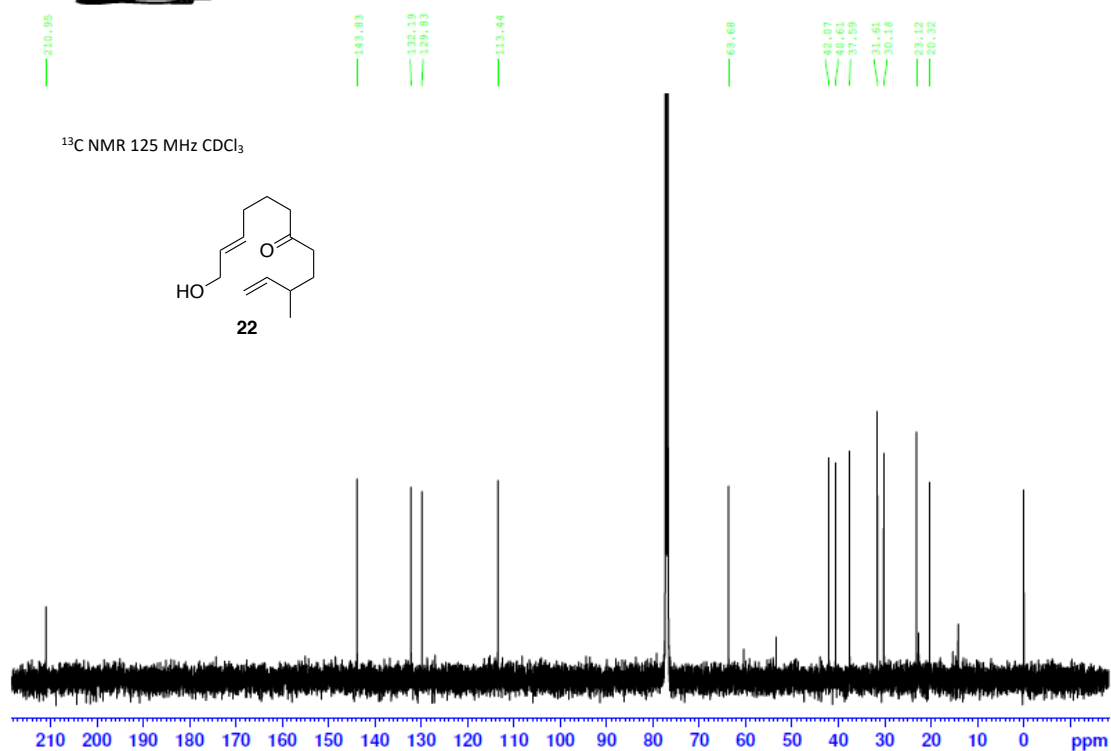

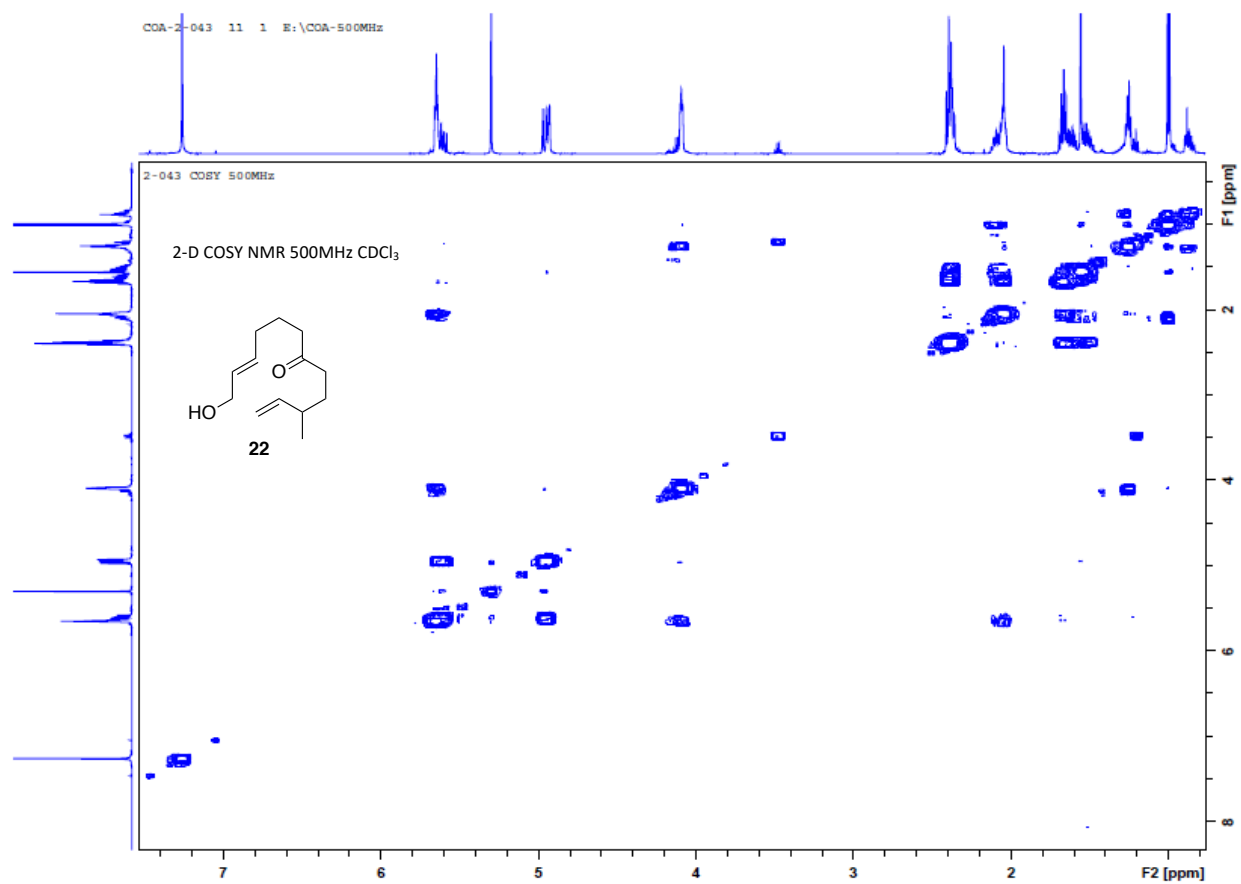

COA-2-044 Pmaj 1 1H 400

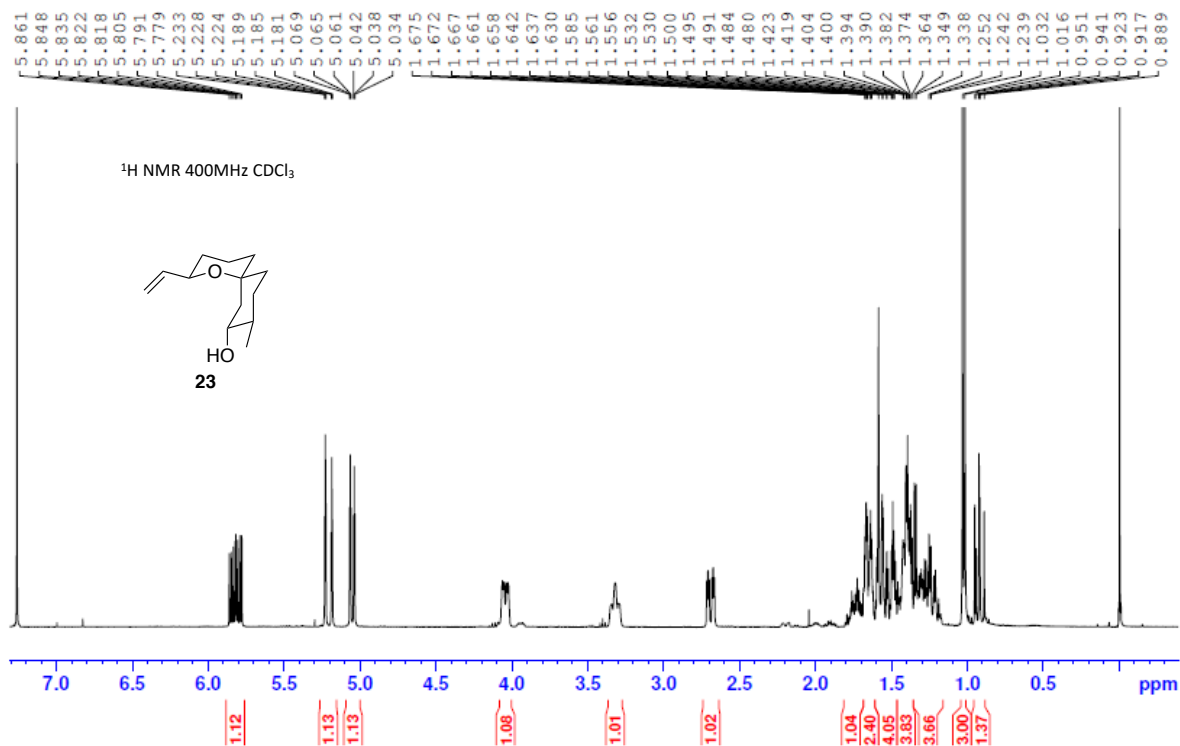

2-236 P1 13C 500

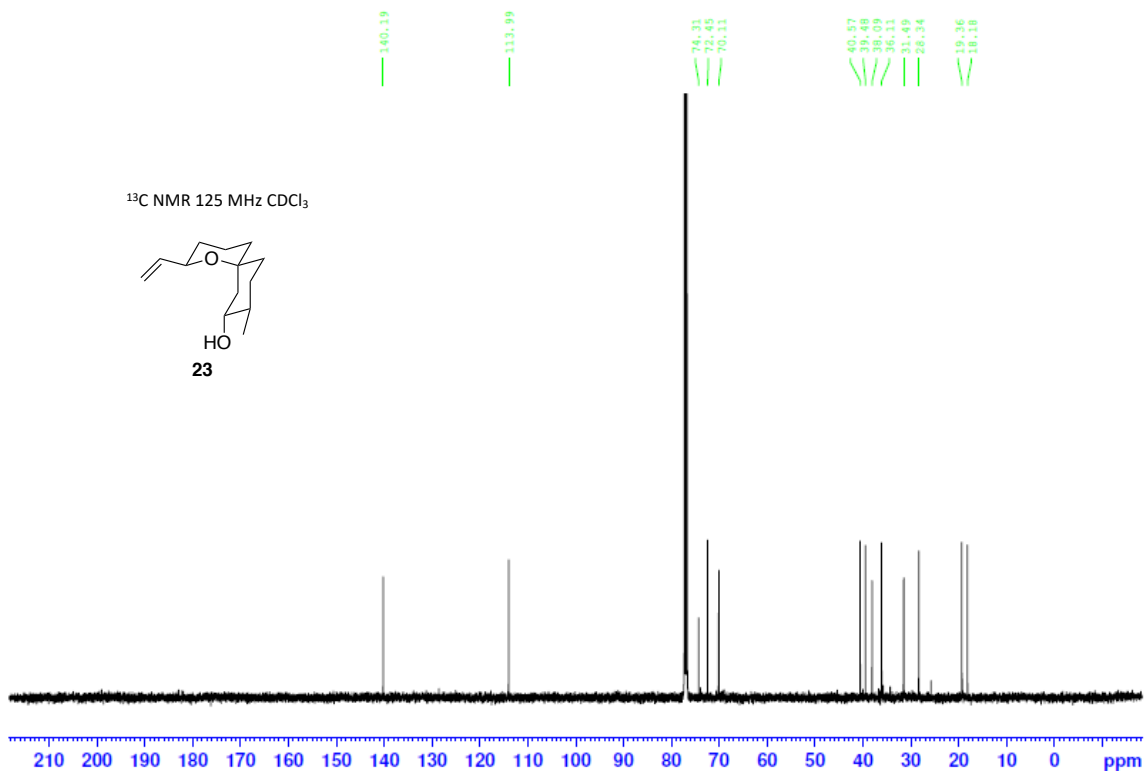



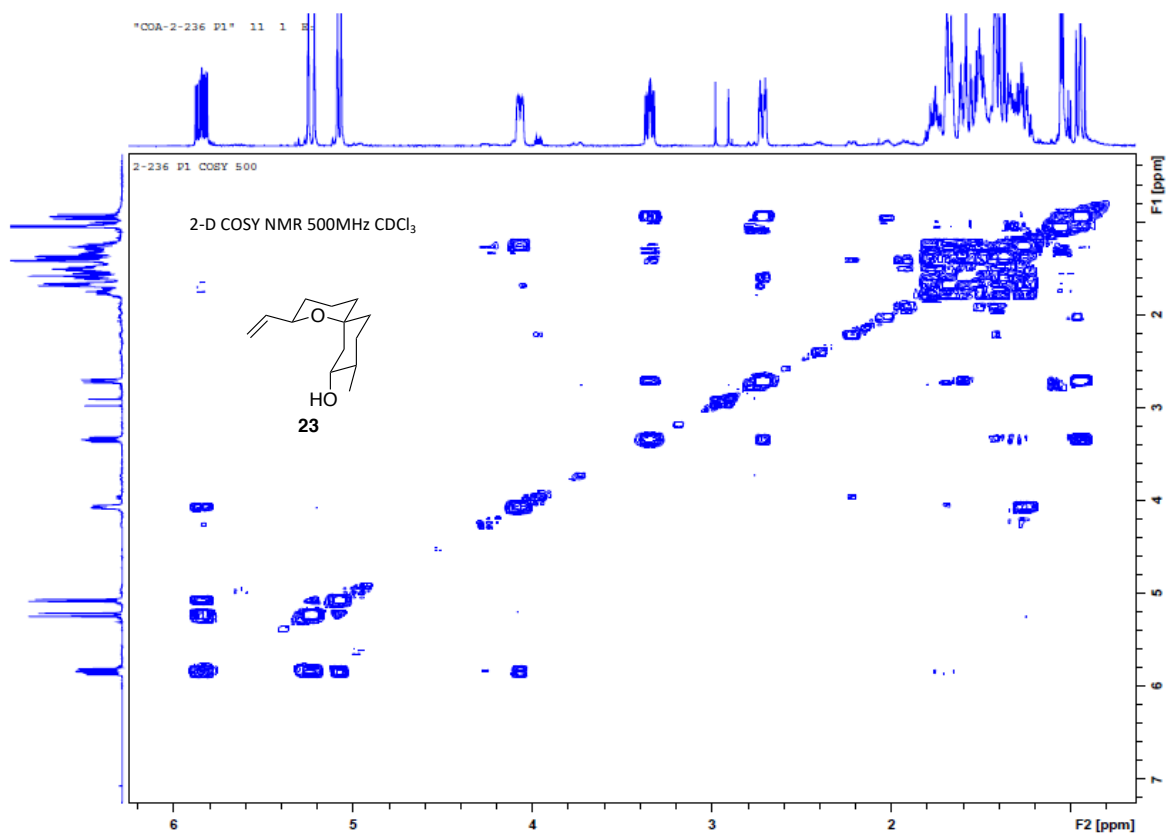

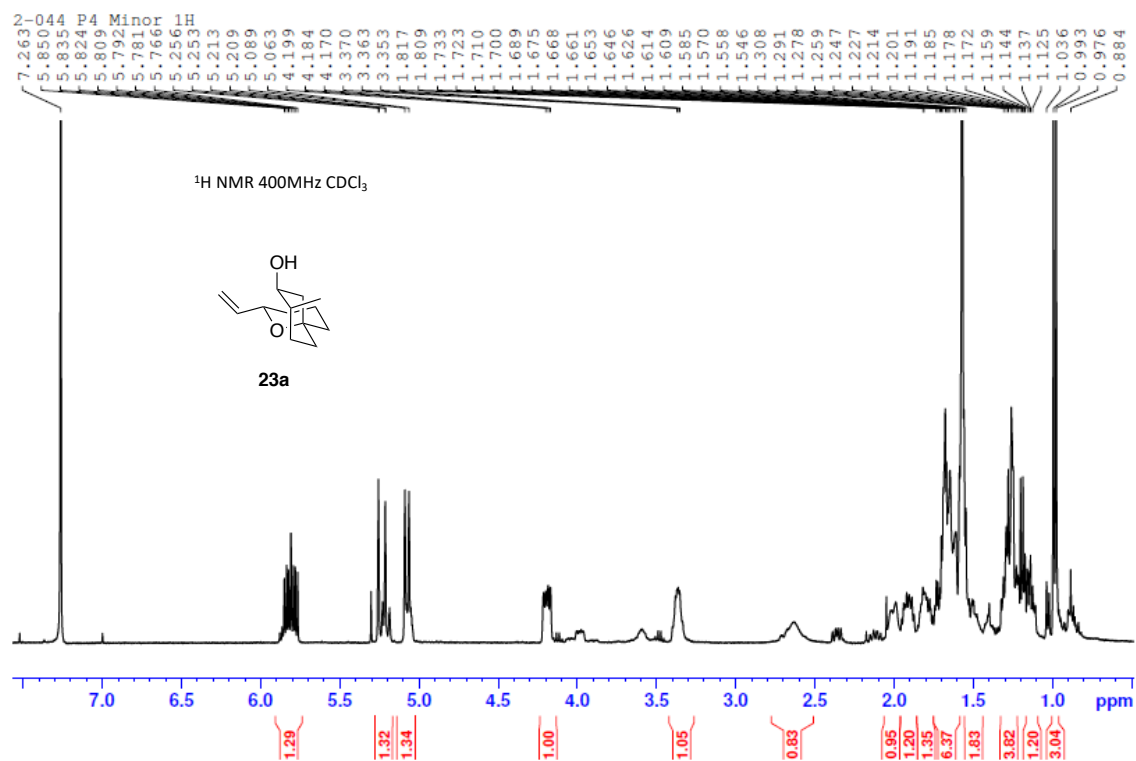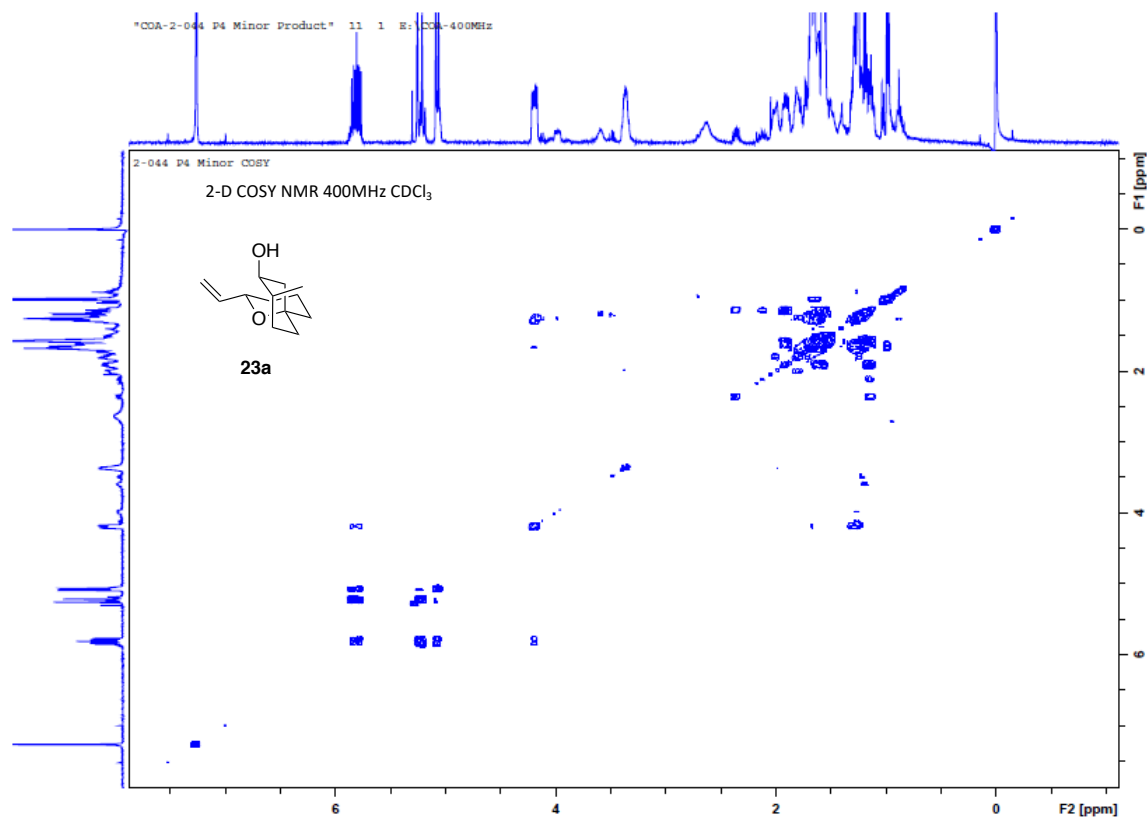

2-044 P4 Minor 13C

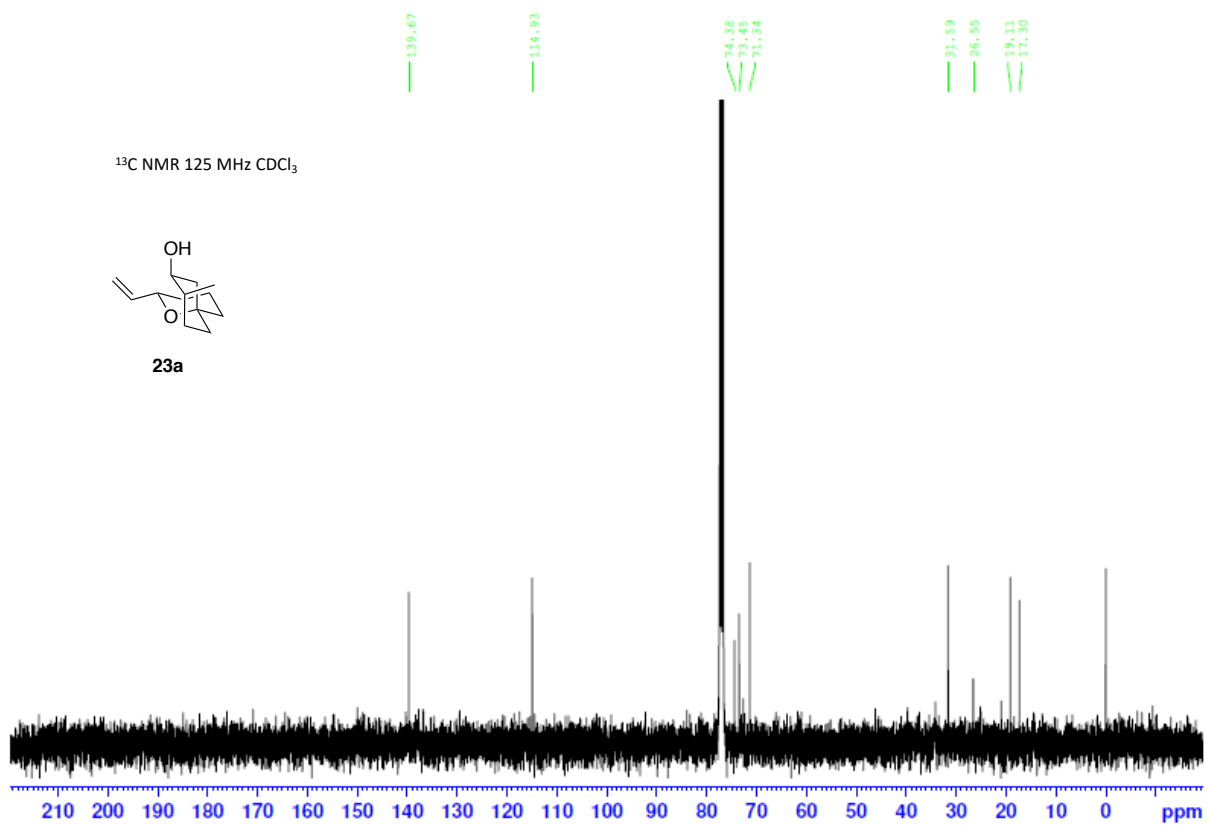

2-201 1H 500MHz CDCl3

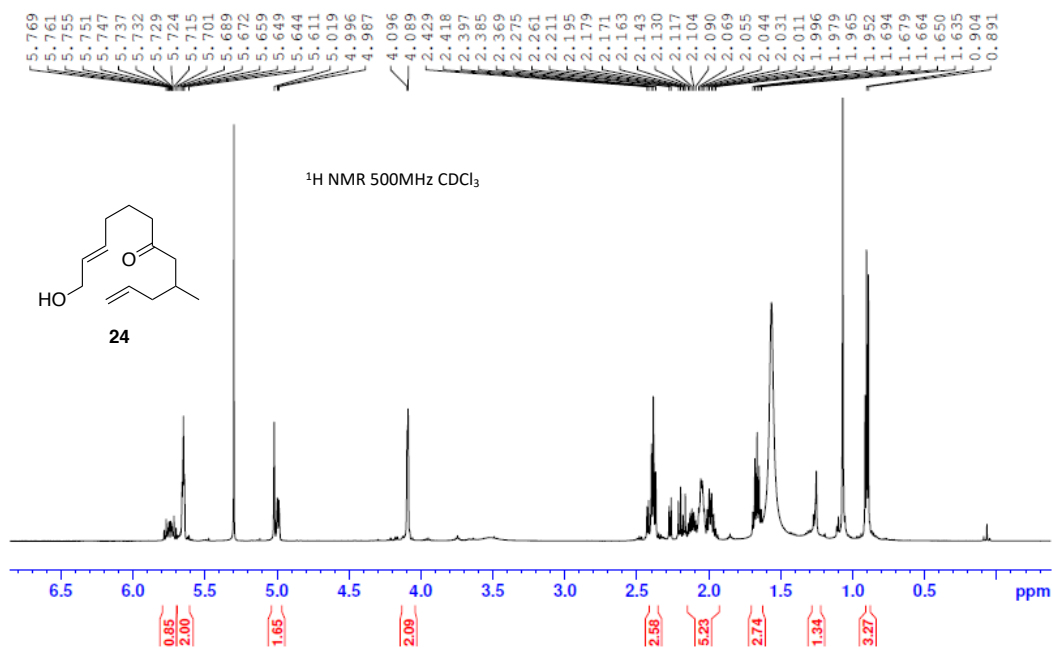

2-201 13C

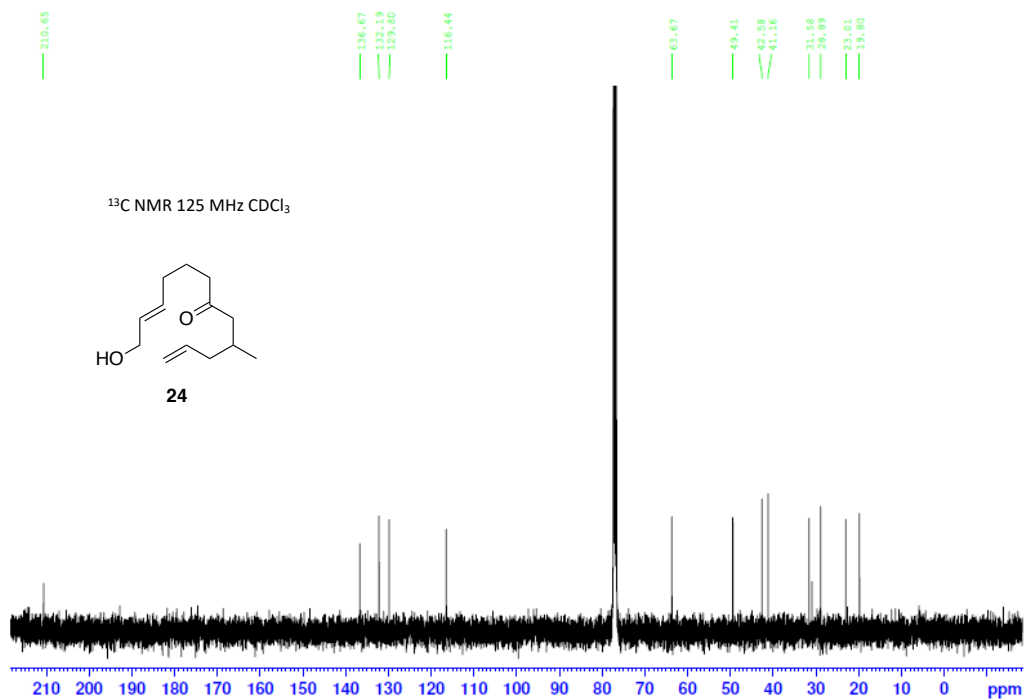

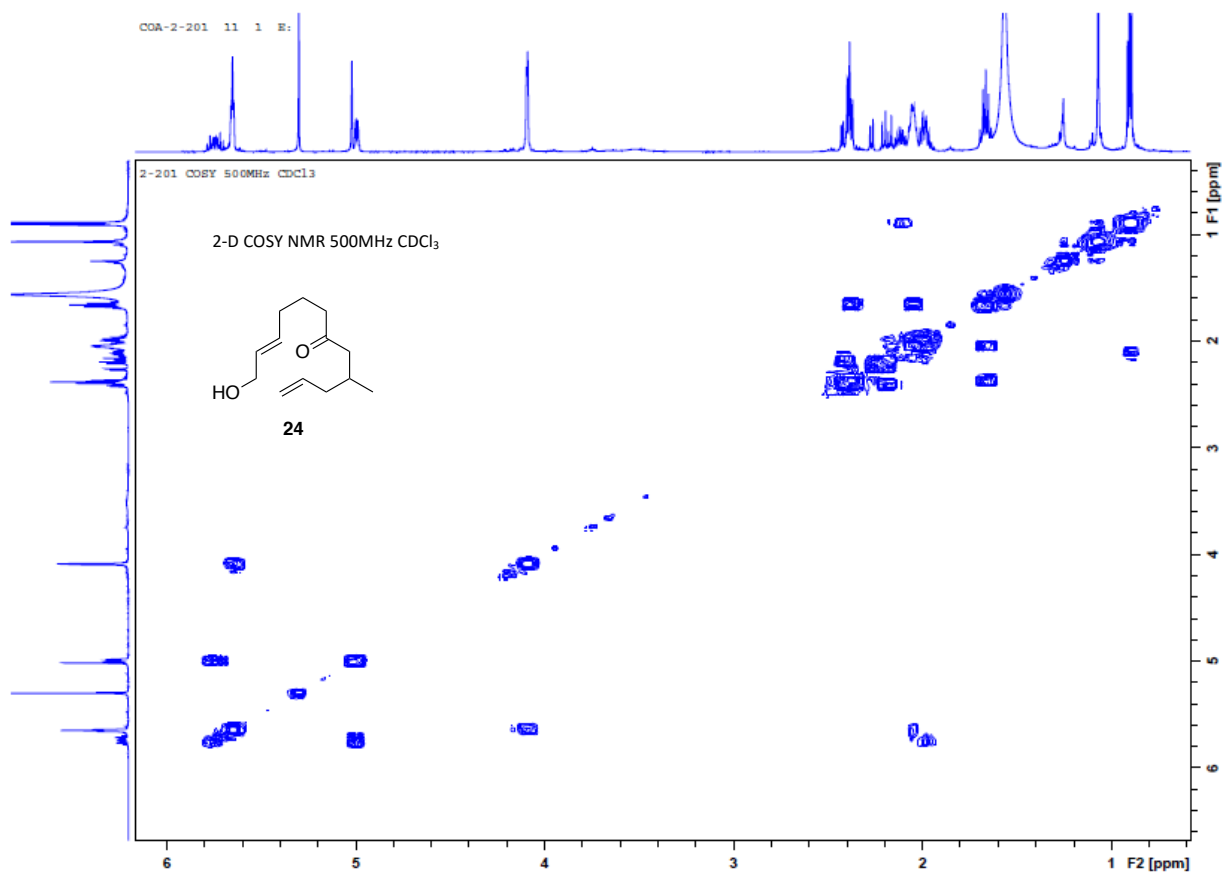

2-235 P1 1H 500

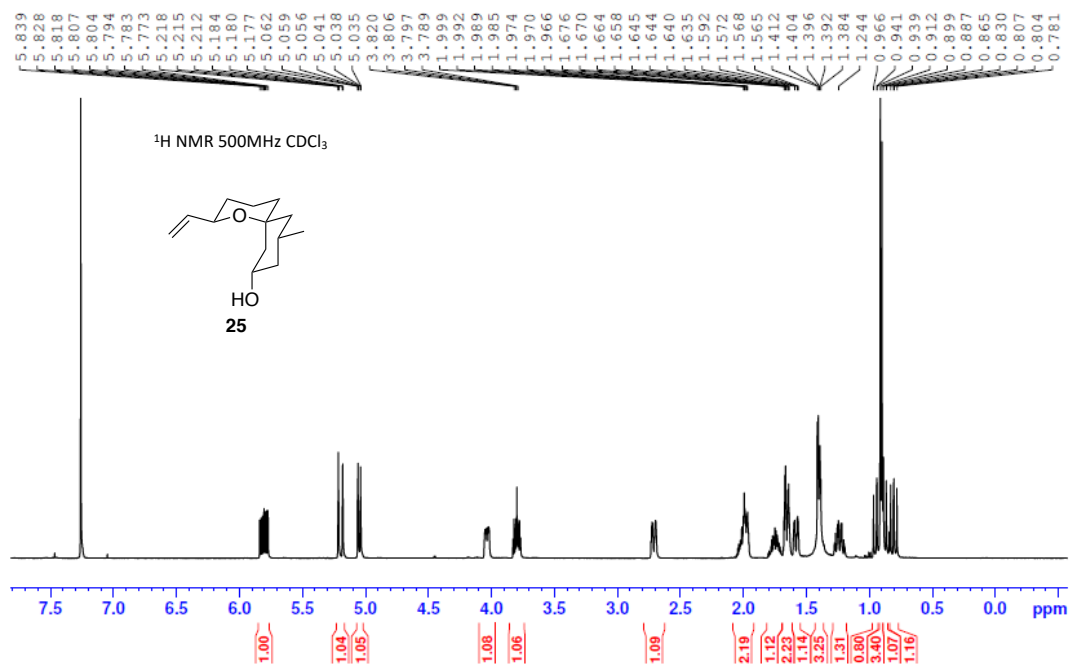

2-235 P1 13C 500

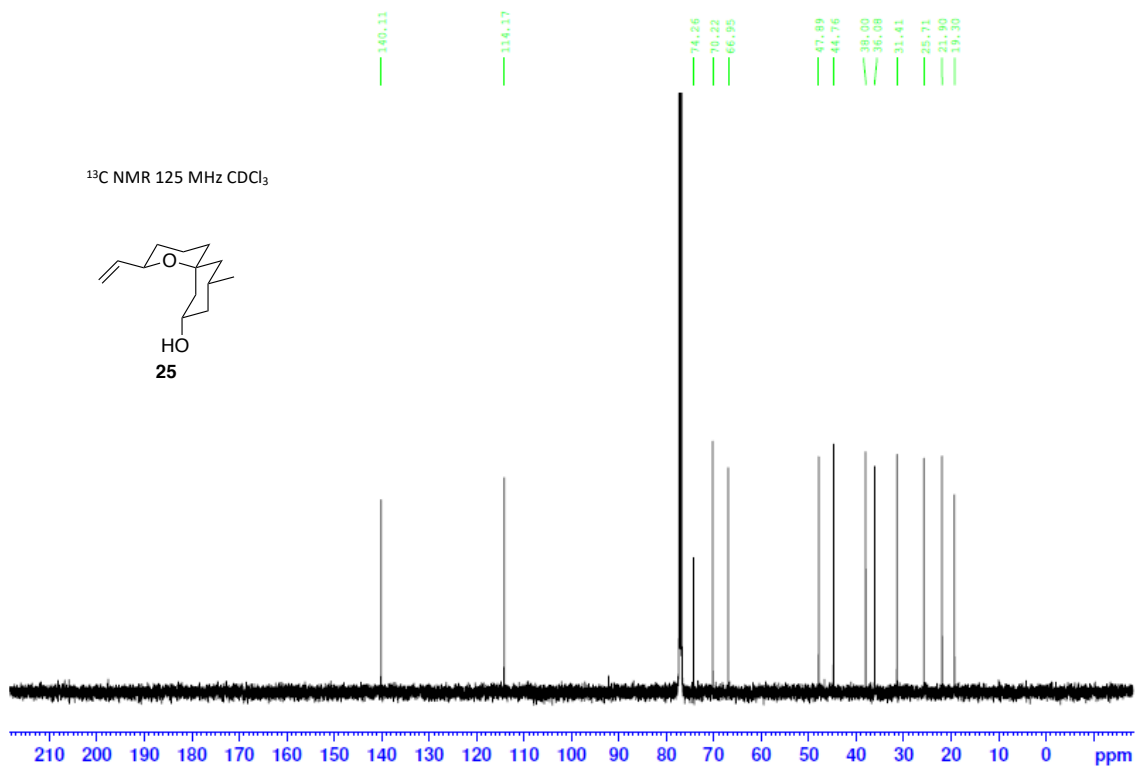

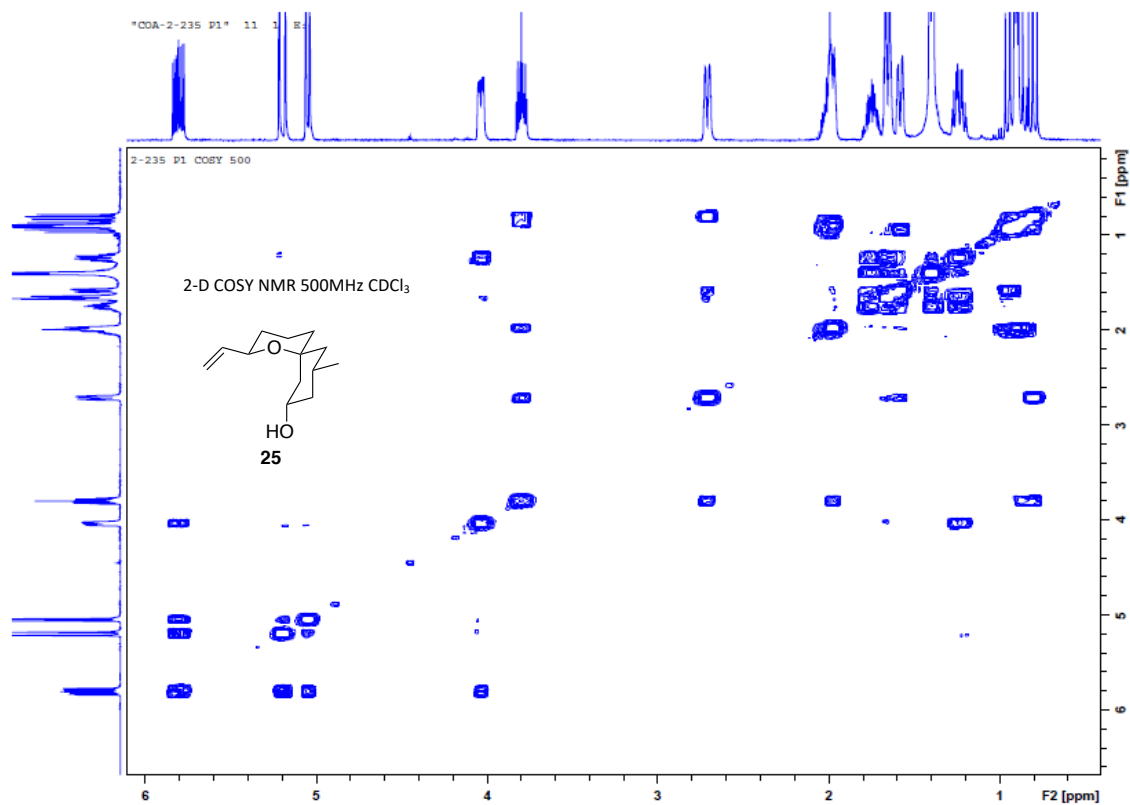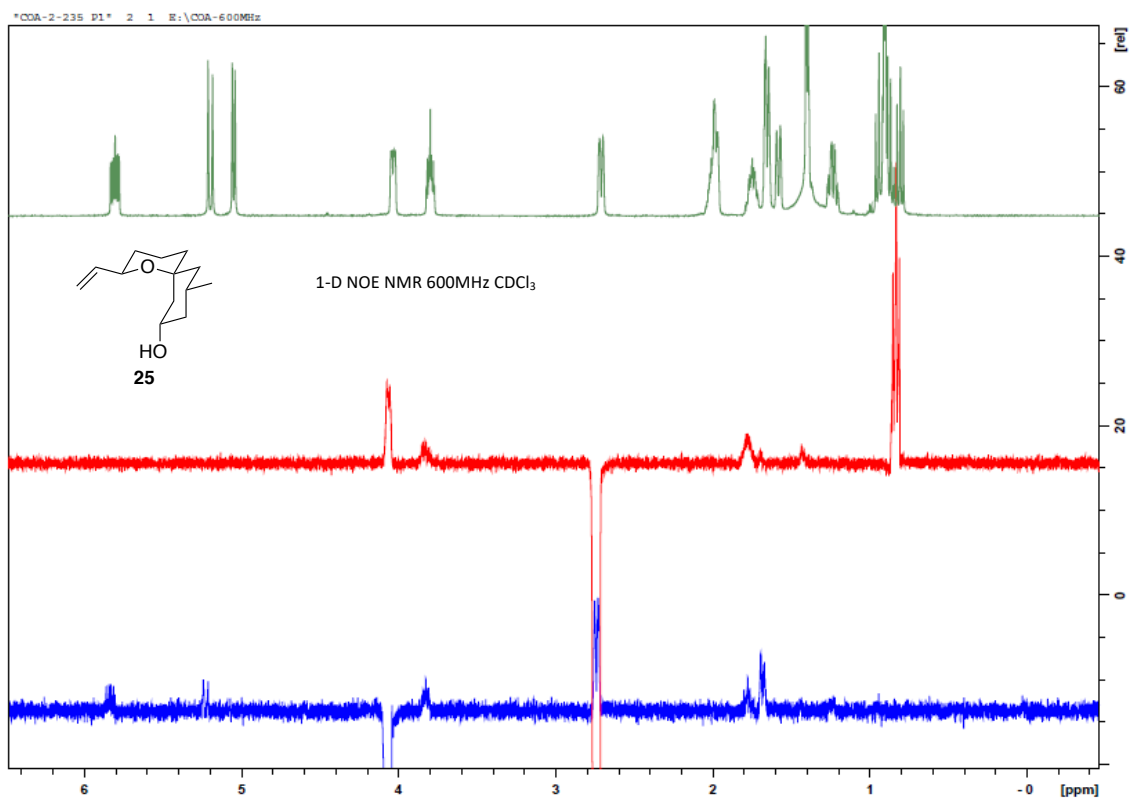

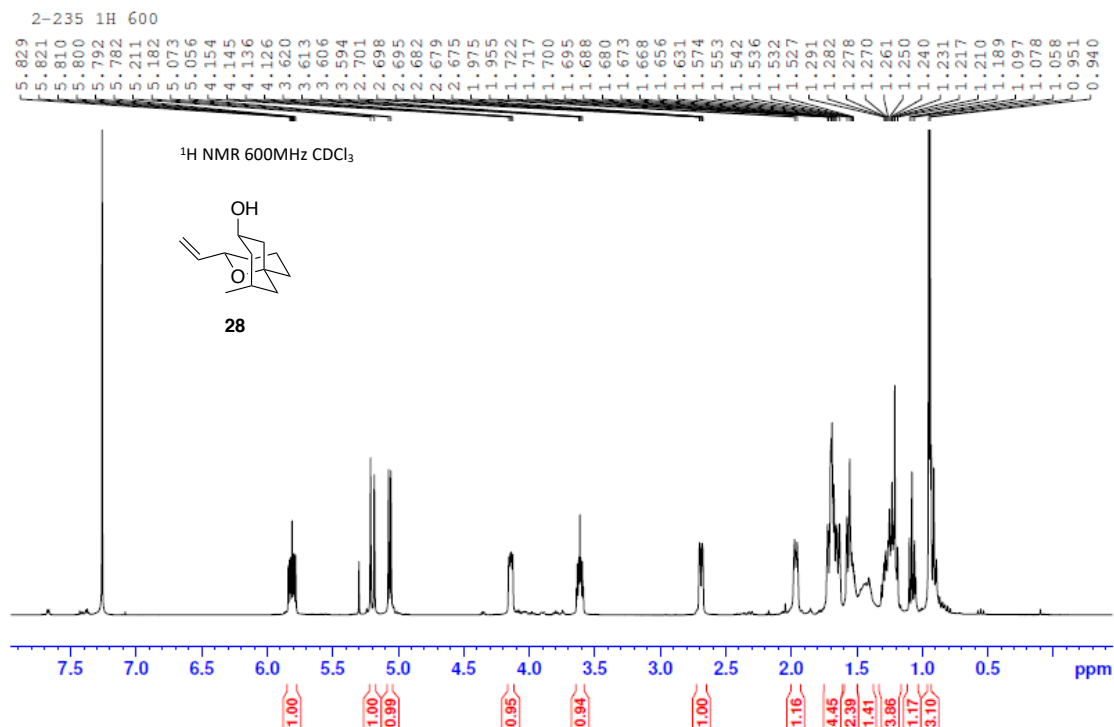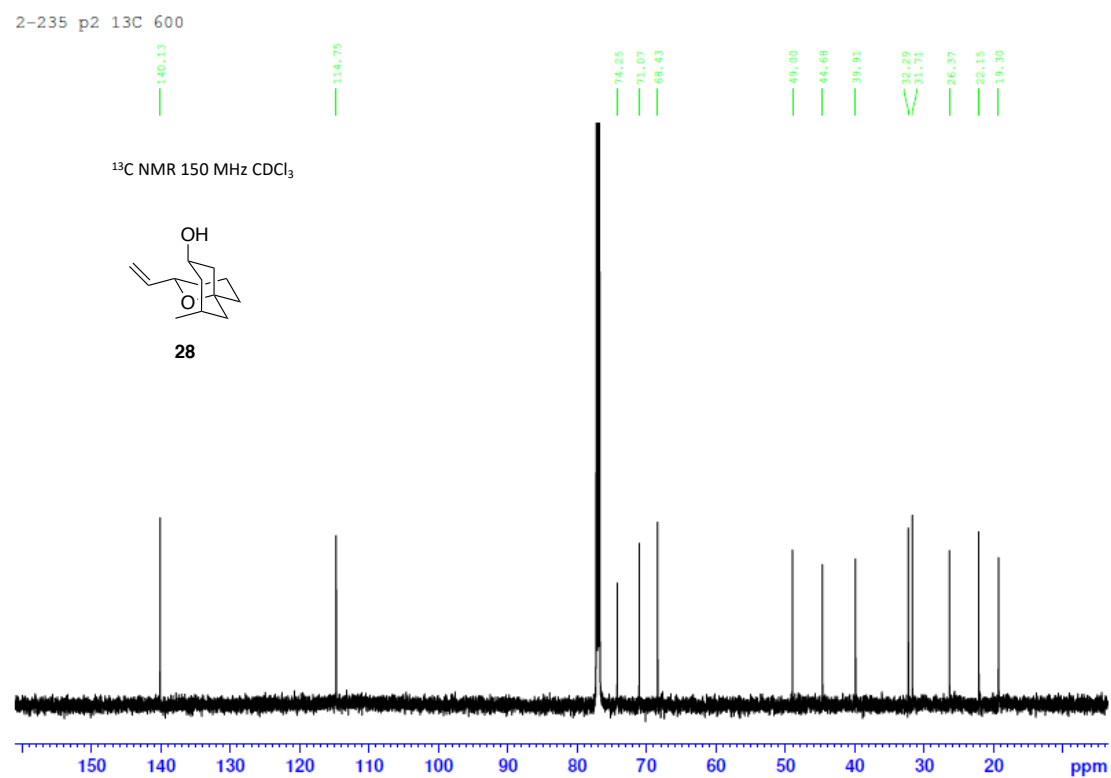



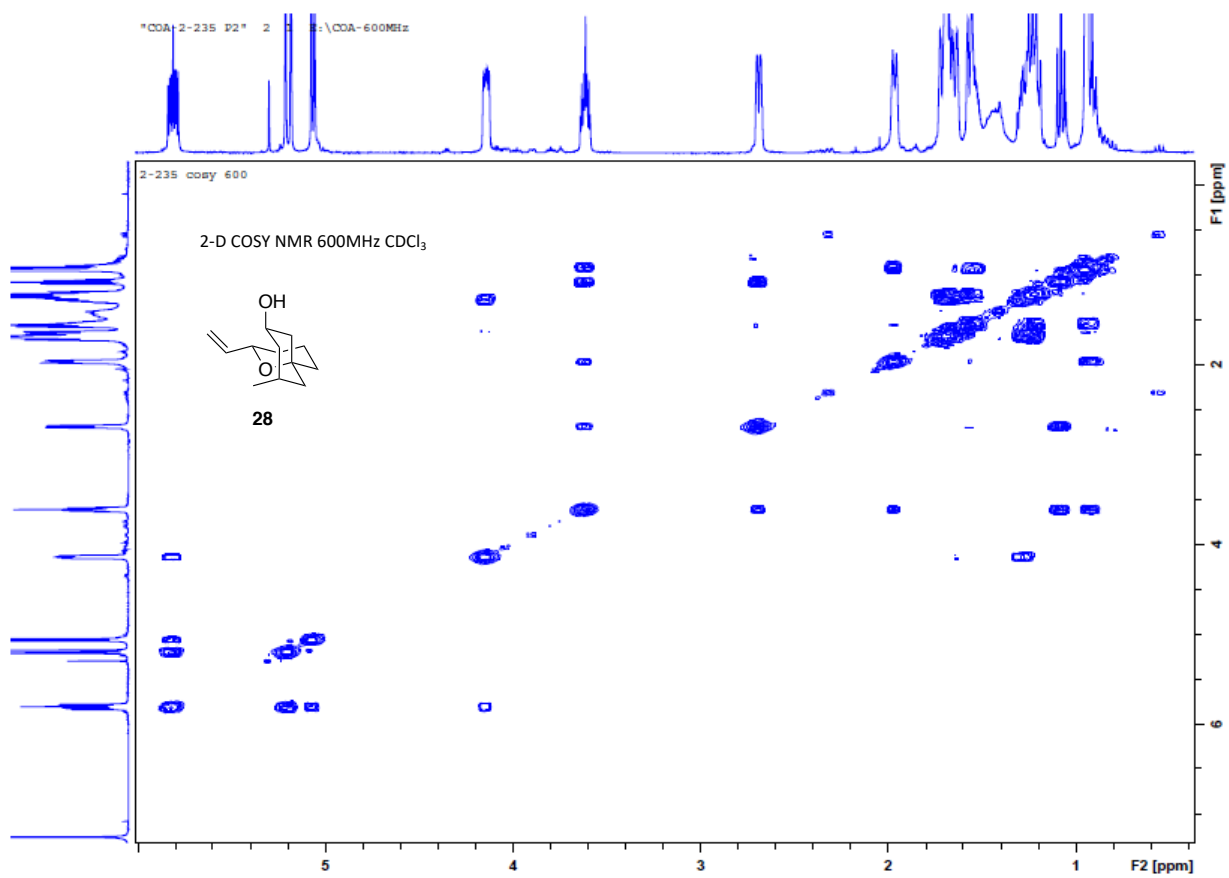

2-192 1H 500

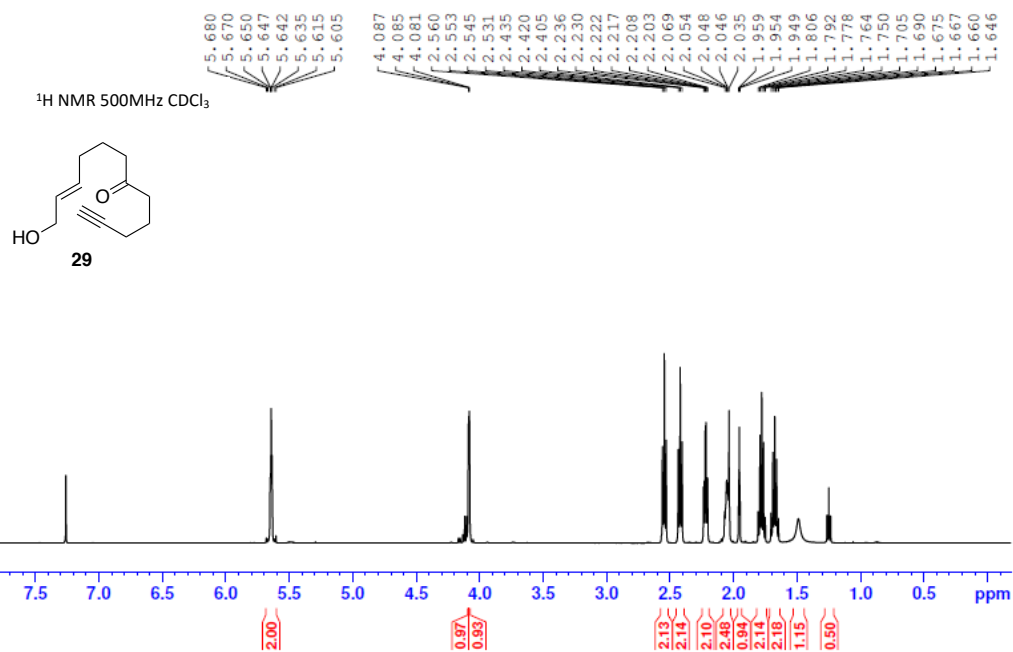

2-192 13C 500

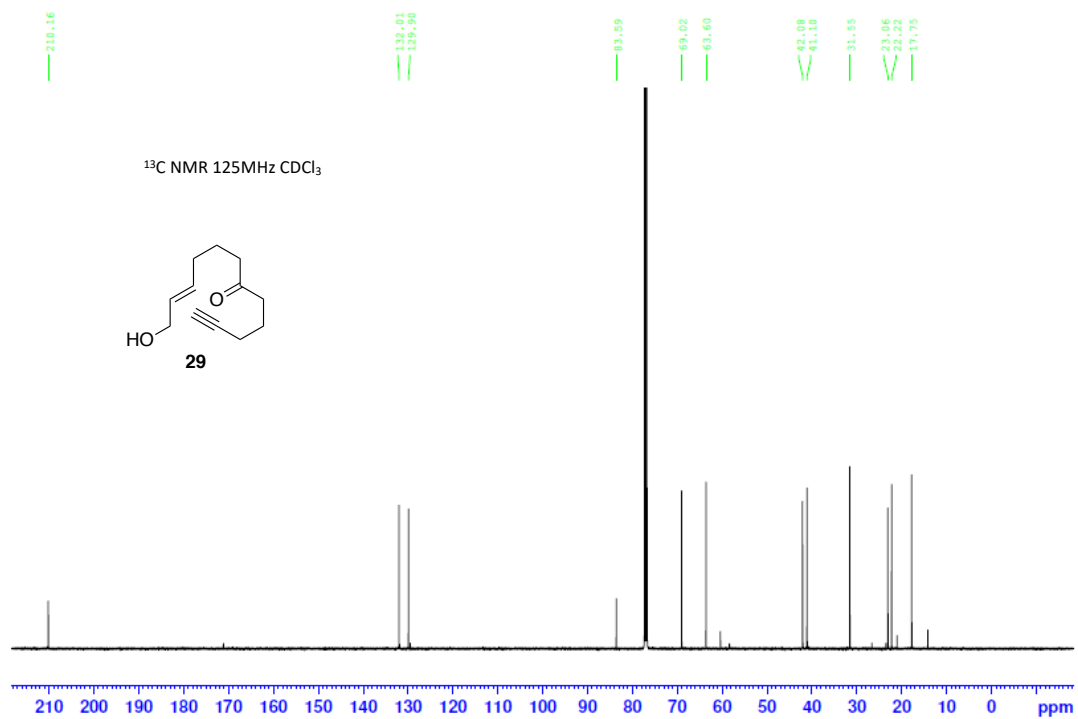

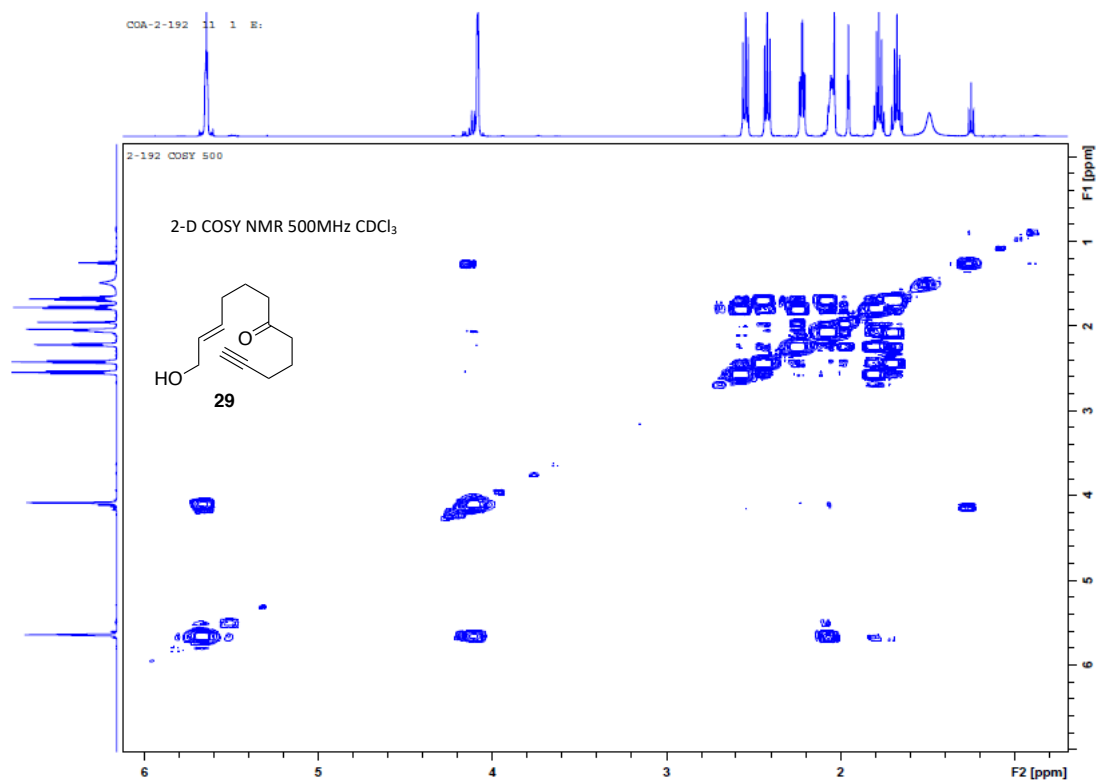

2-193 P1 500 1H

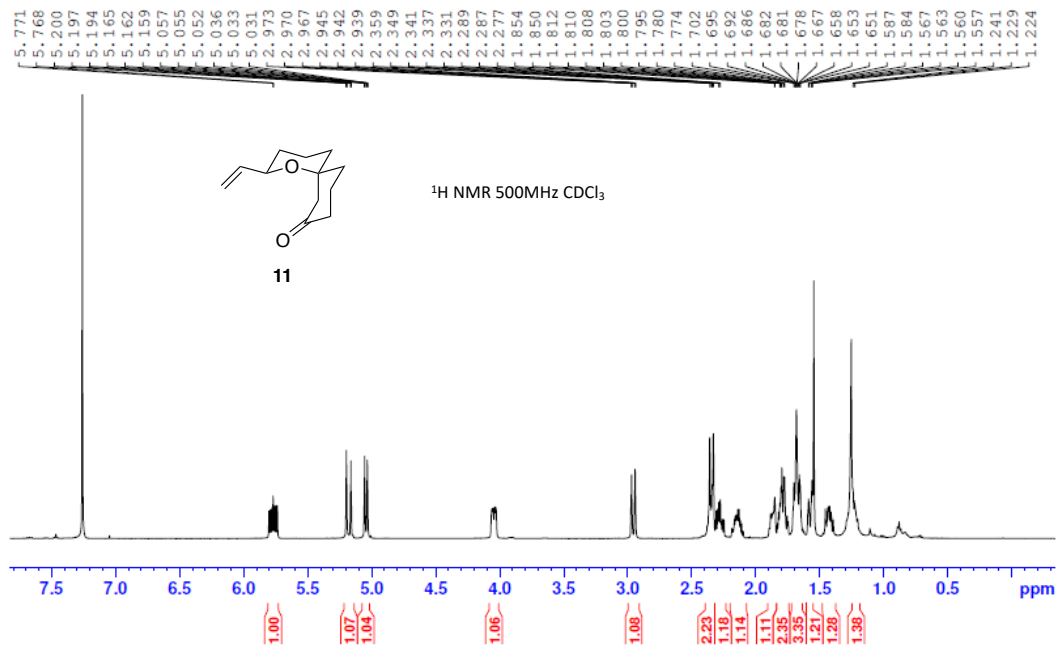

2-193 P1 500 13C

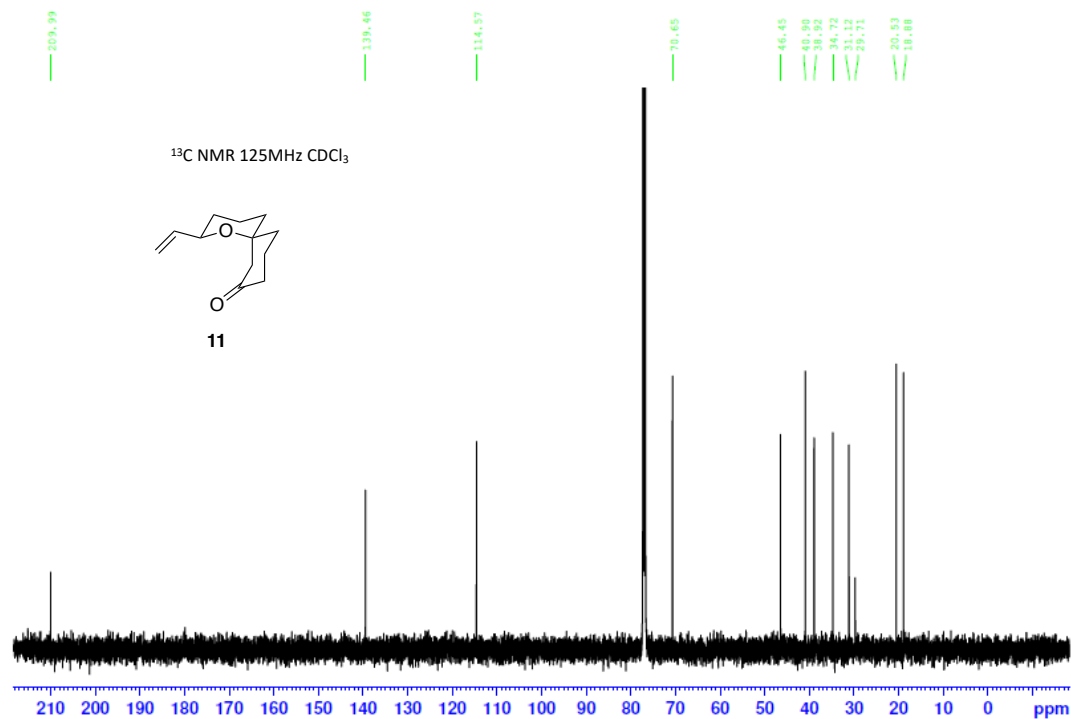

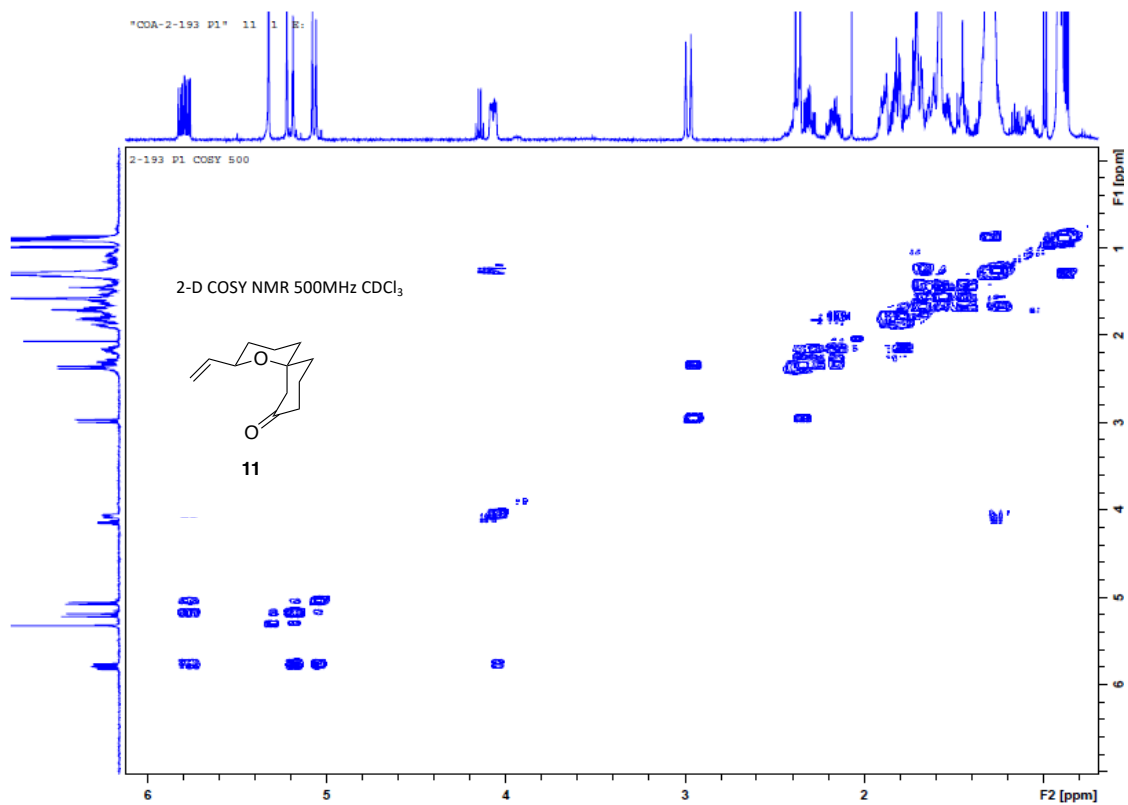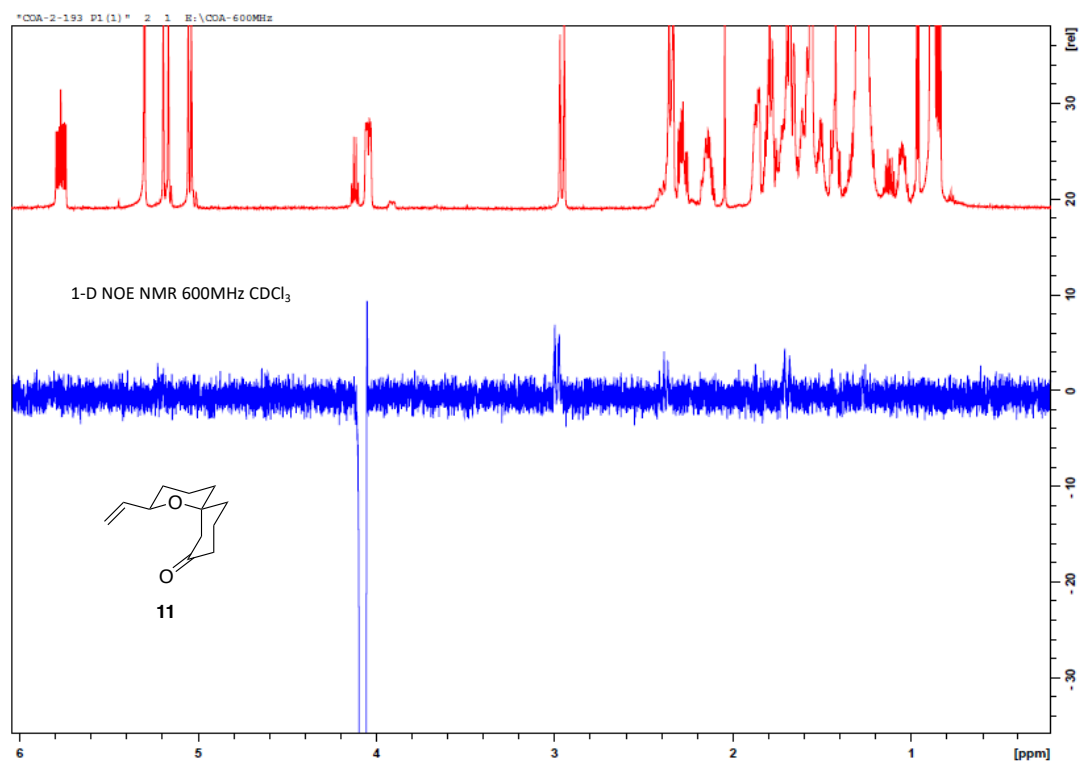

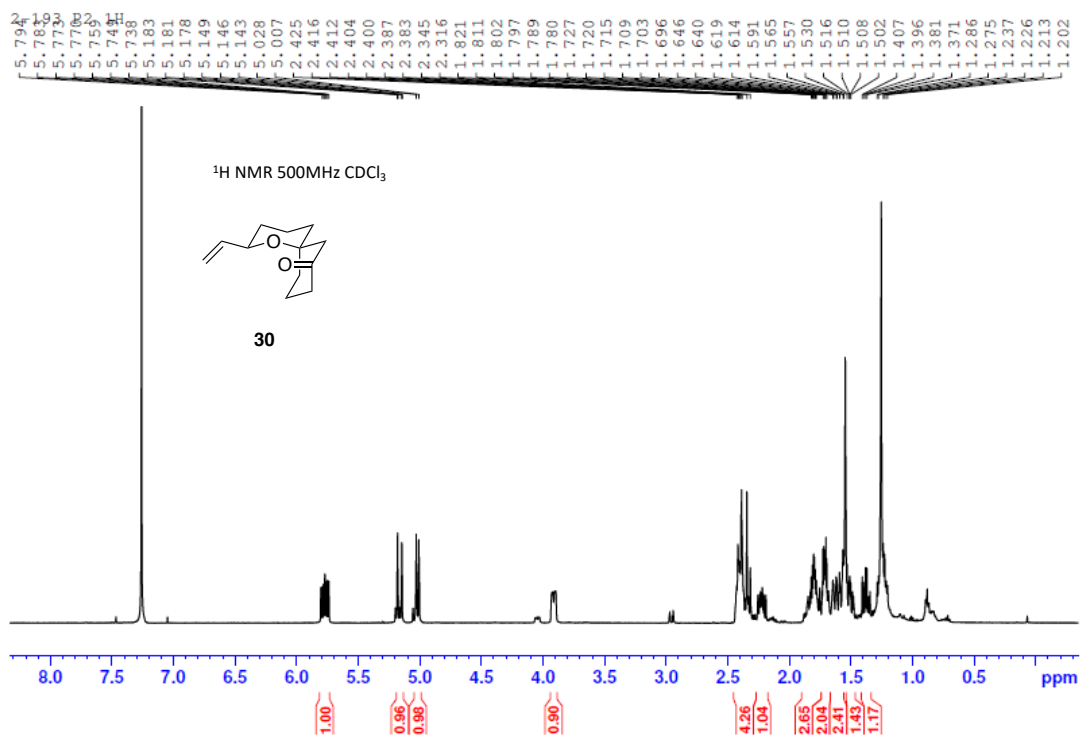

2-193 P2 13C

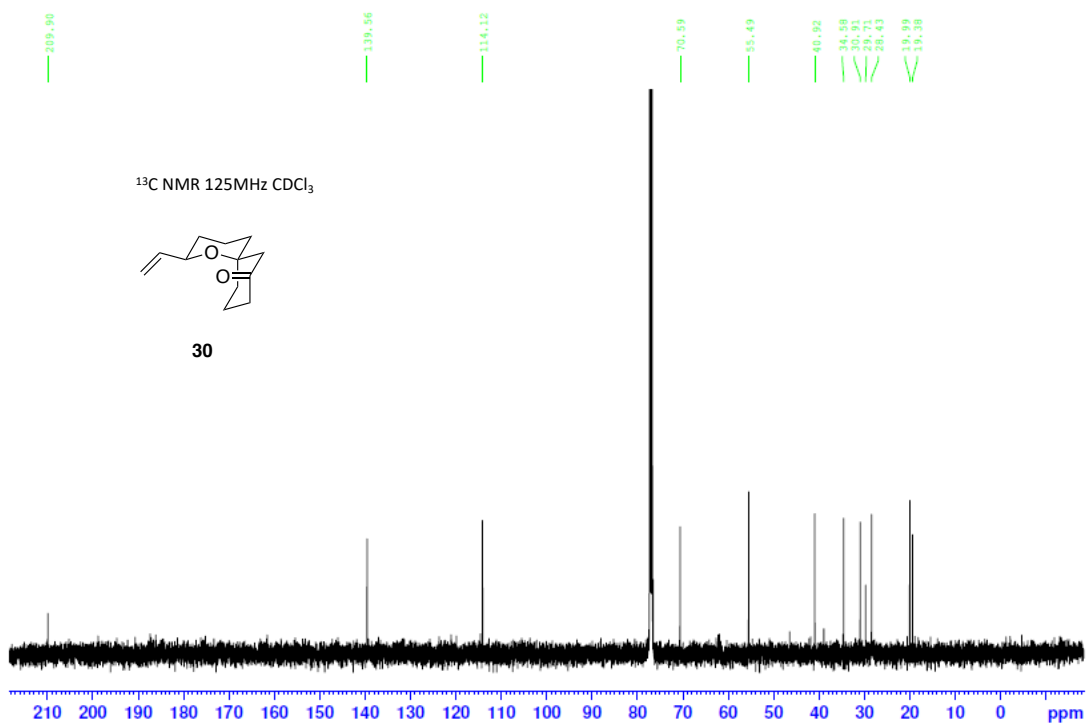

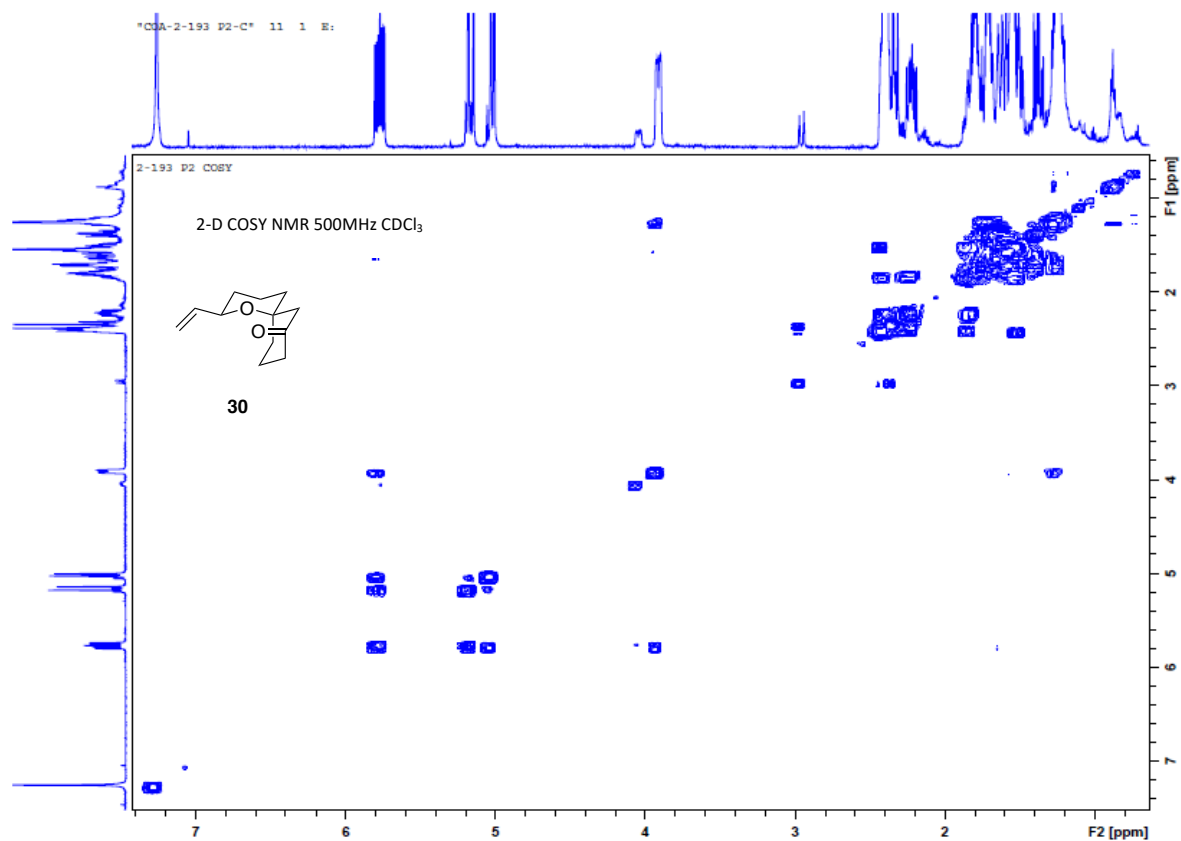

2-177 Product <sup>1</sup>H 400

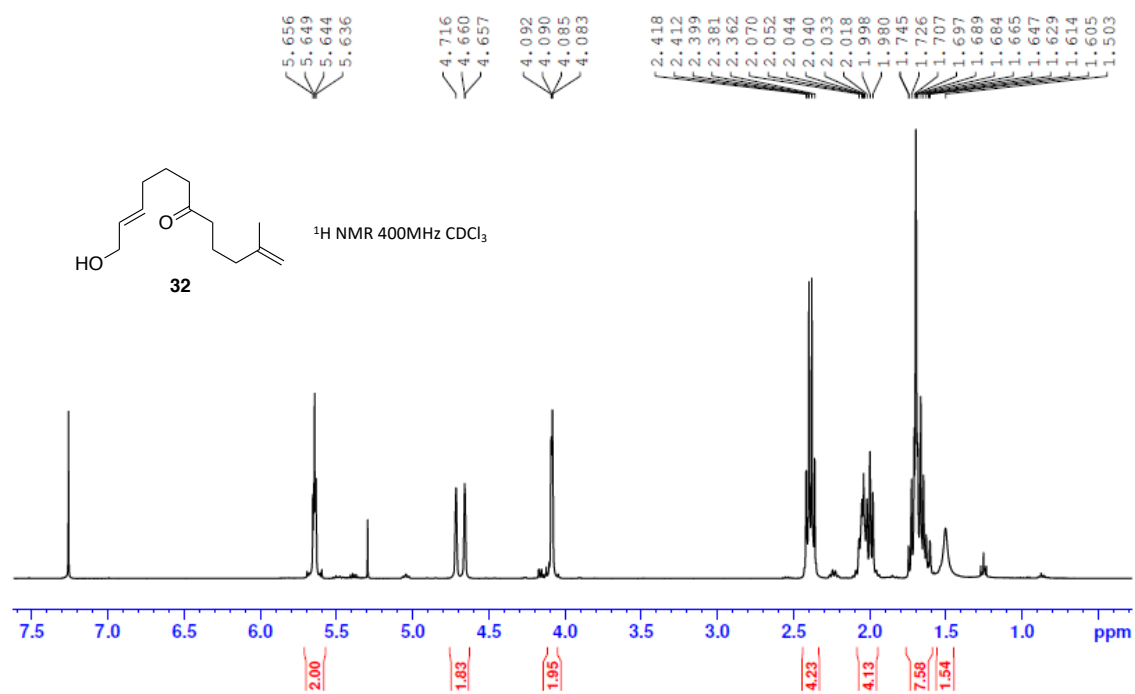

2-177 Product COSY 400

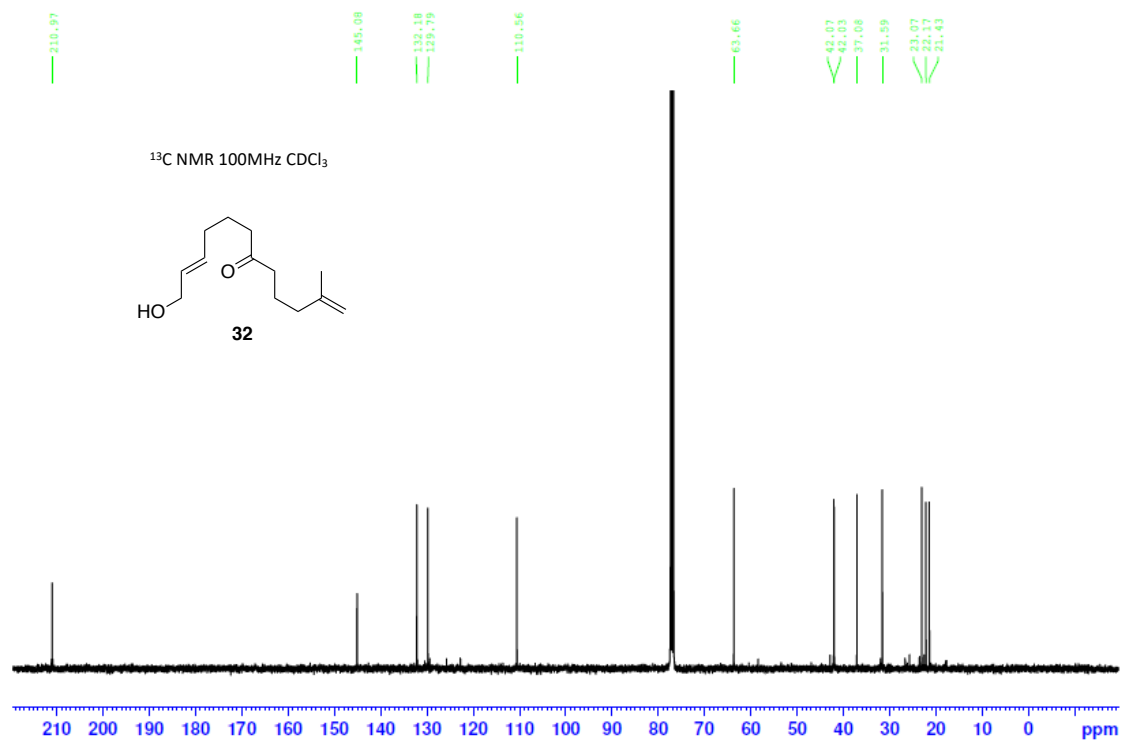



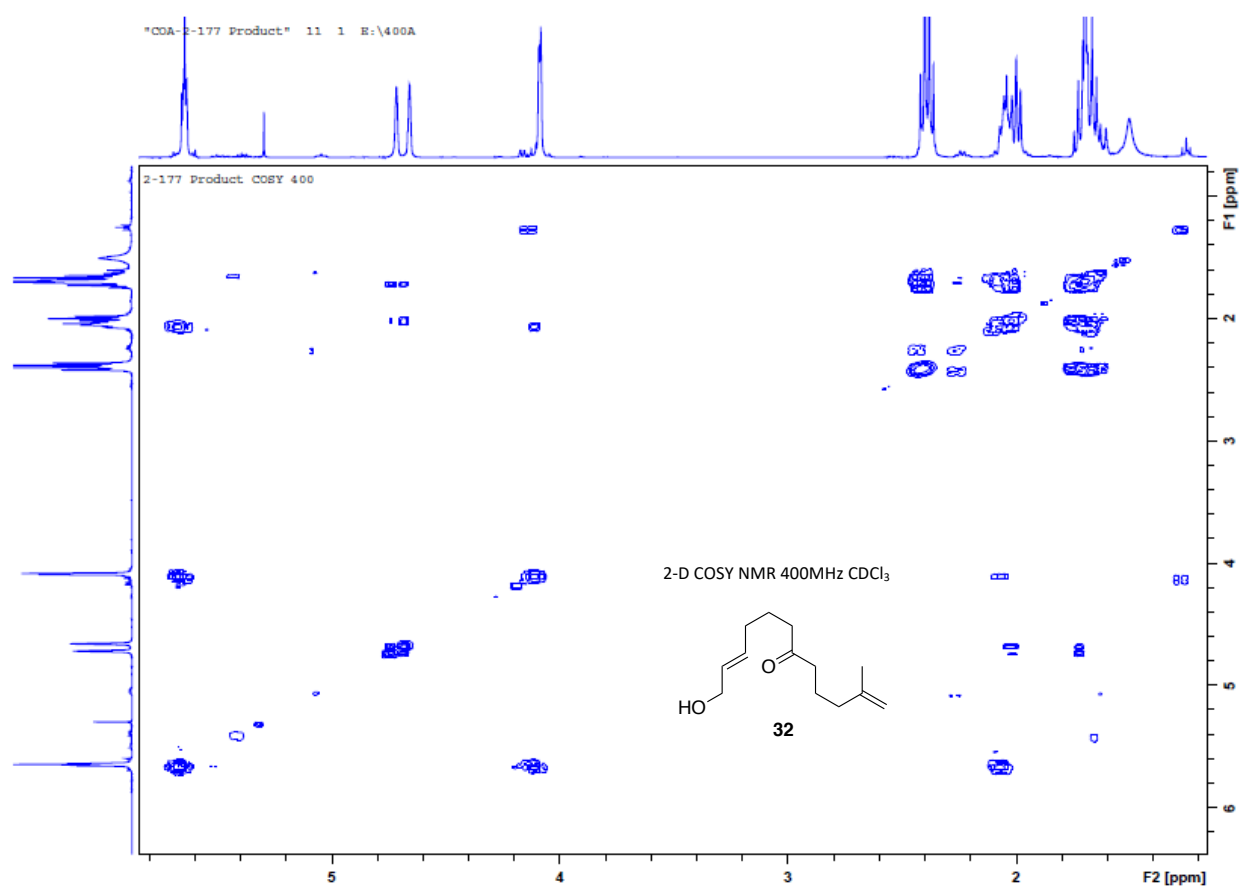

2-178 P3  $^1\text{H}$

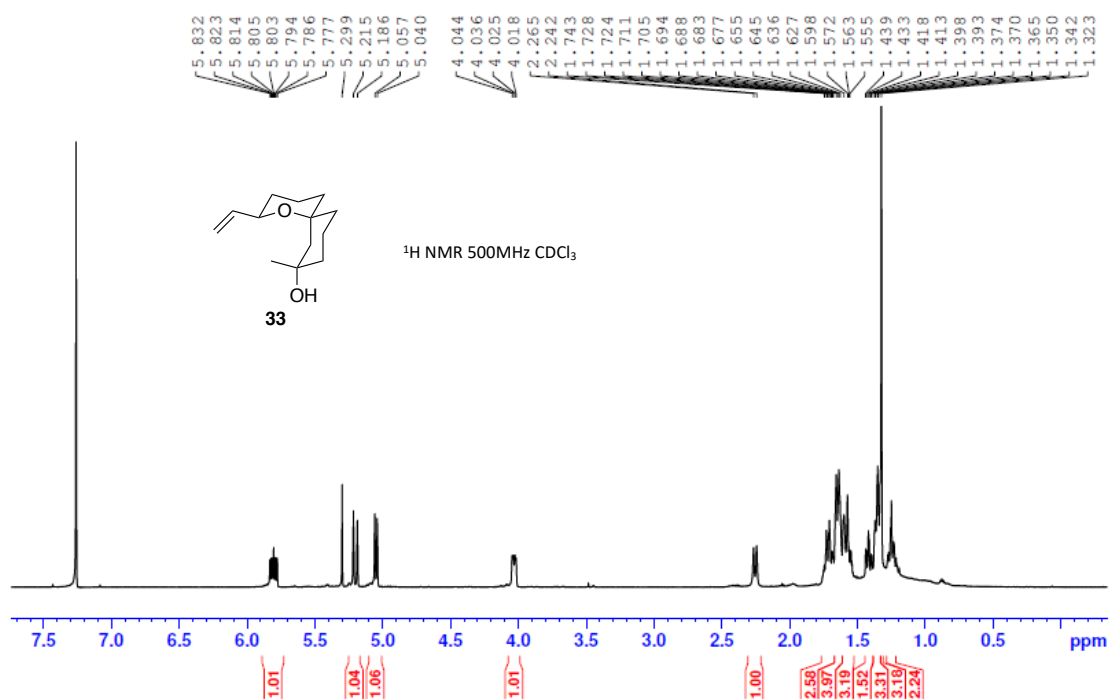

2-178 P3 COSY 500

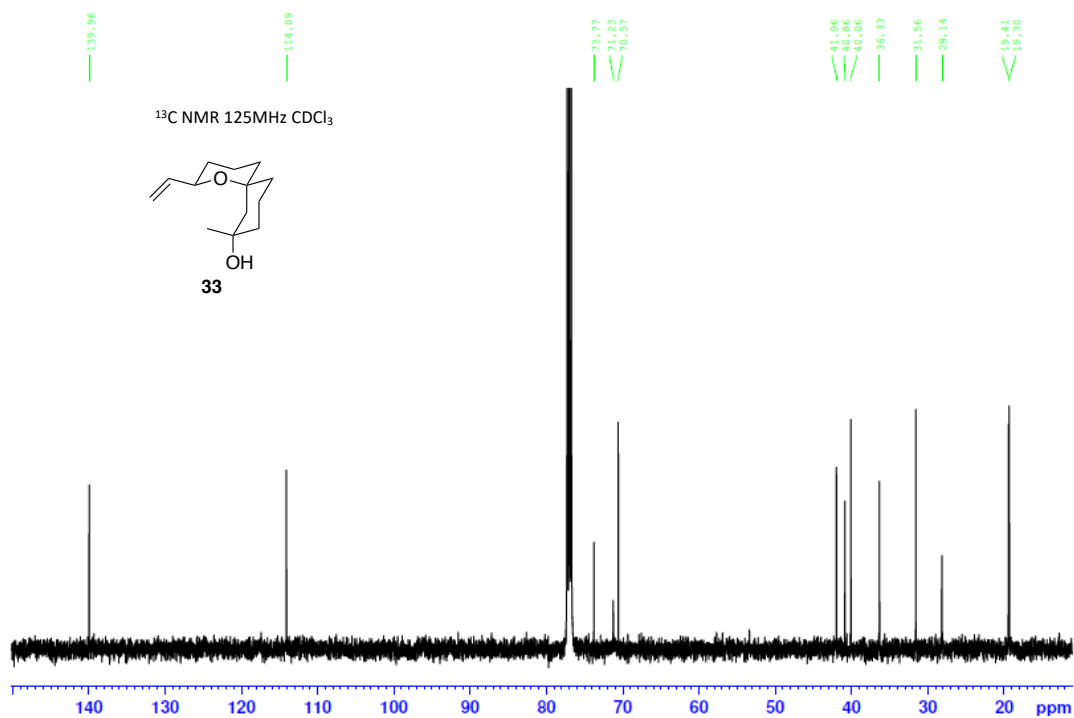

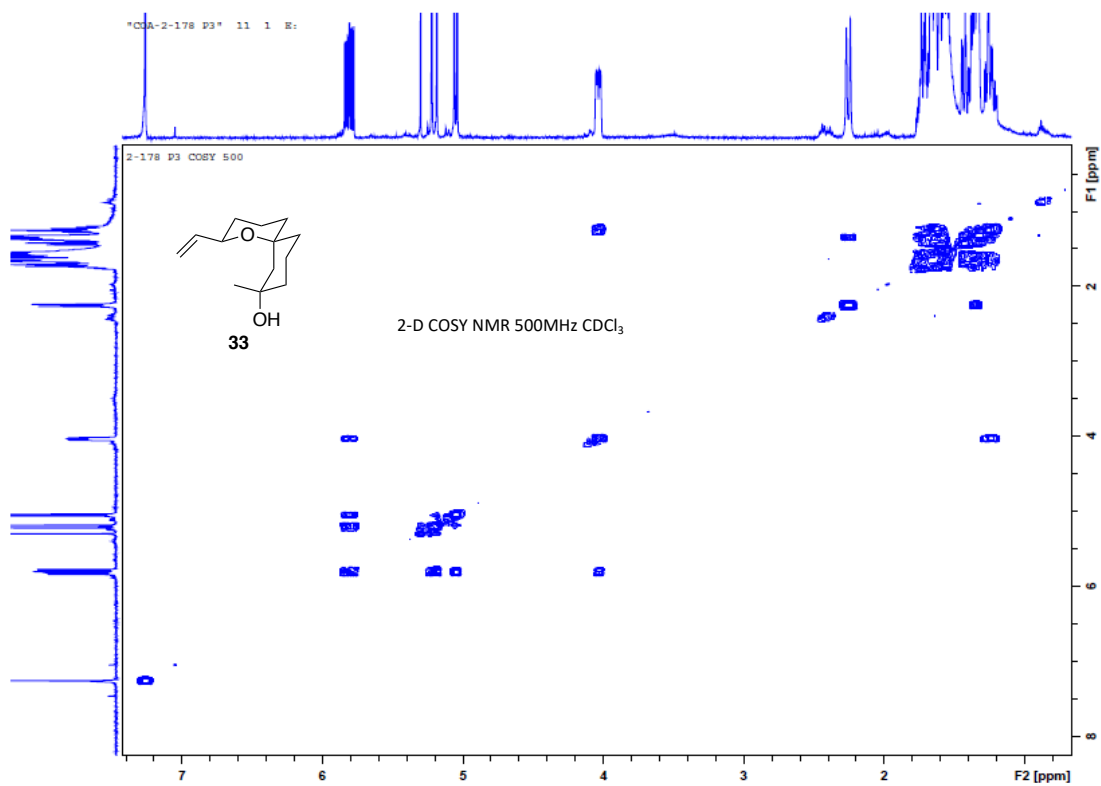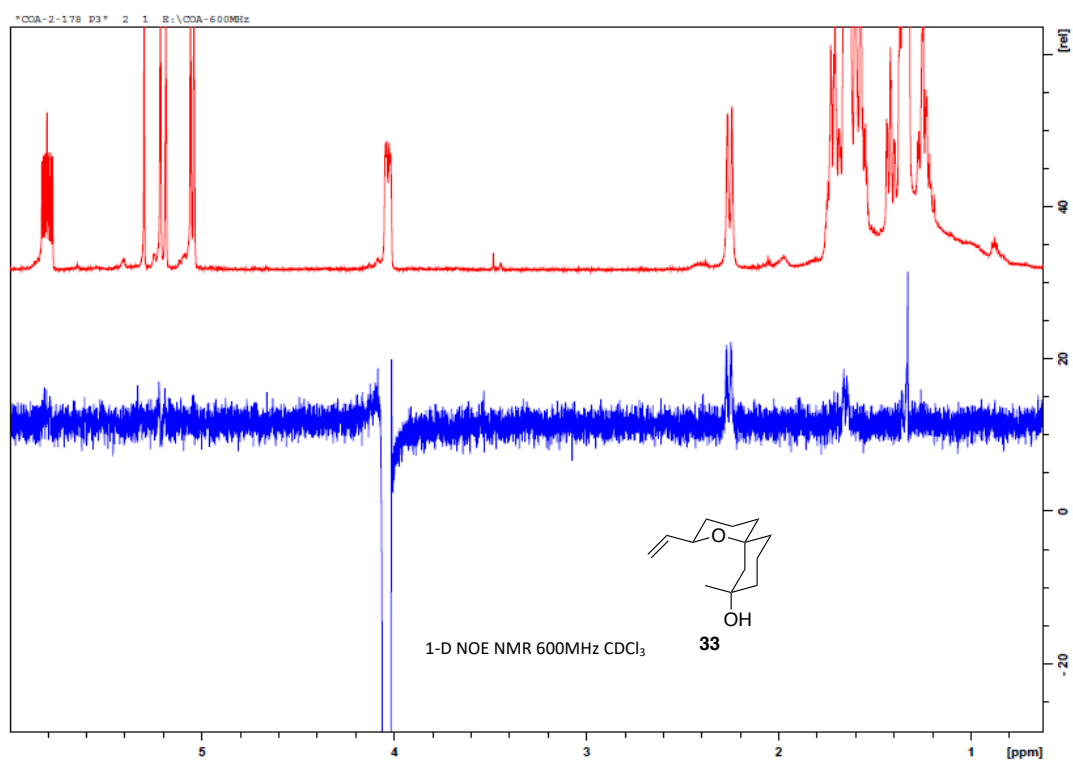

2-202 P1 1H

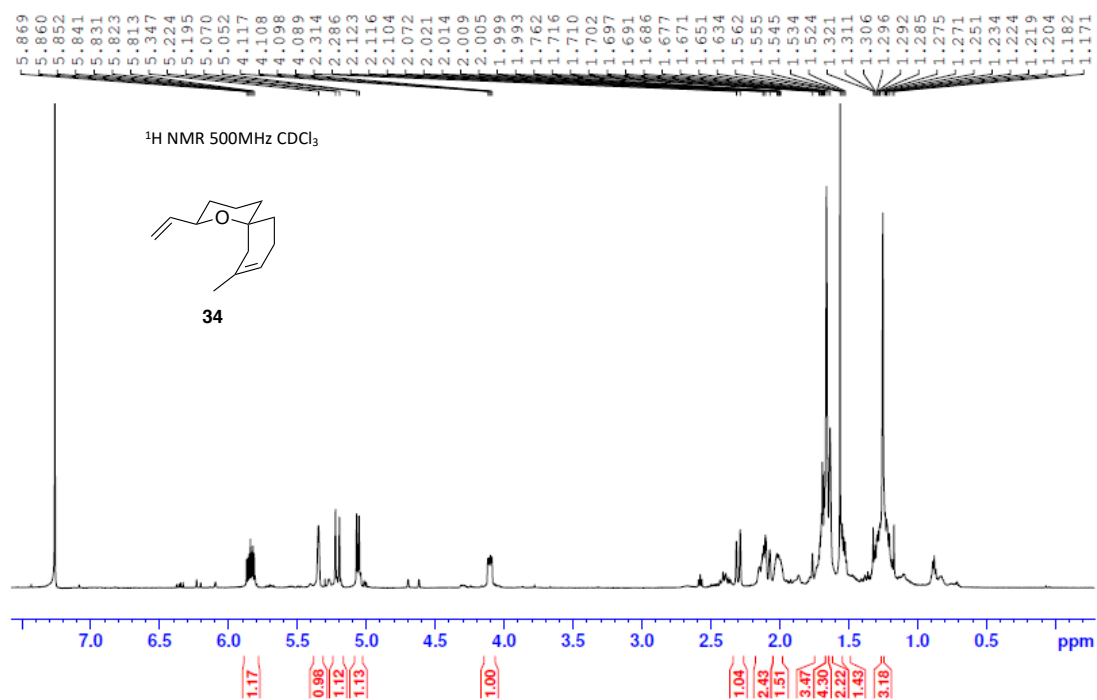

2-202 P1 13C

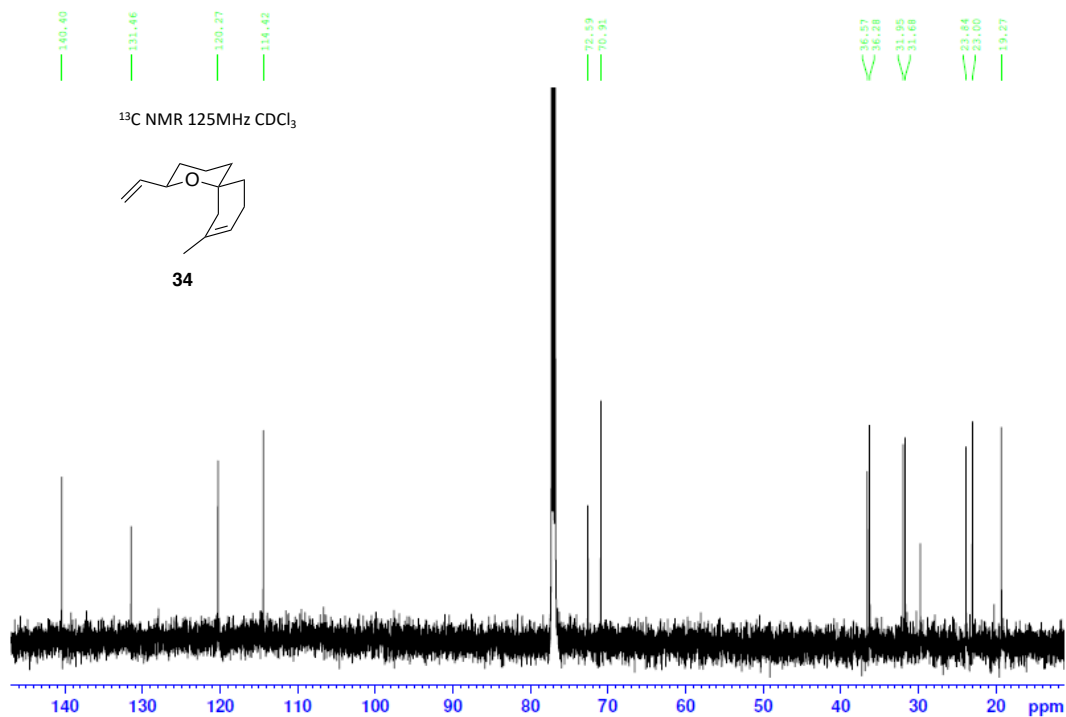

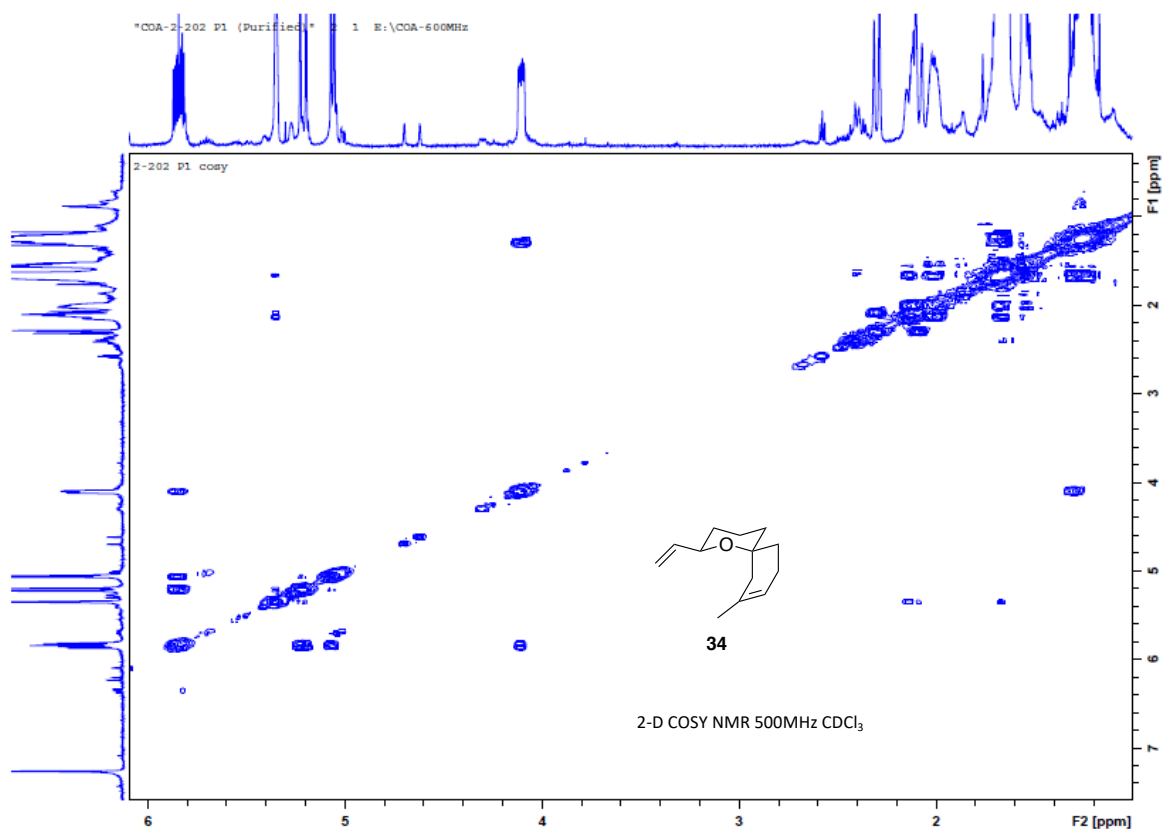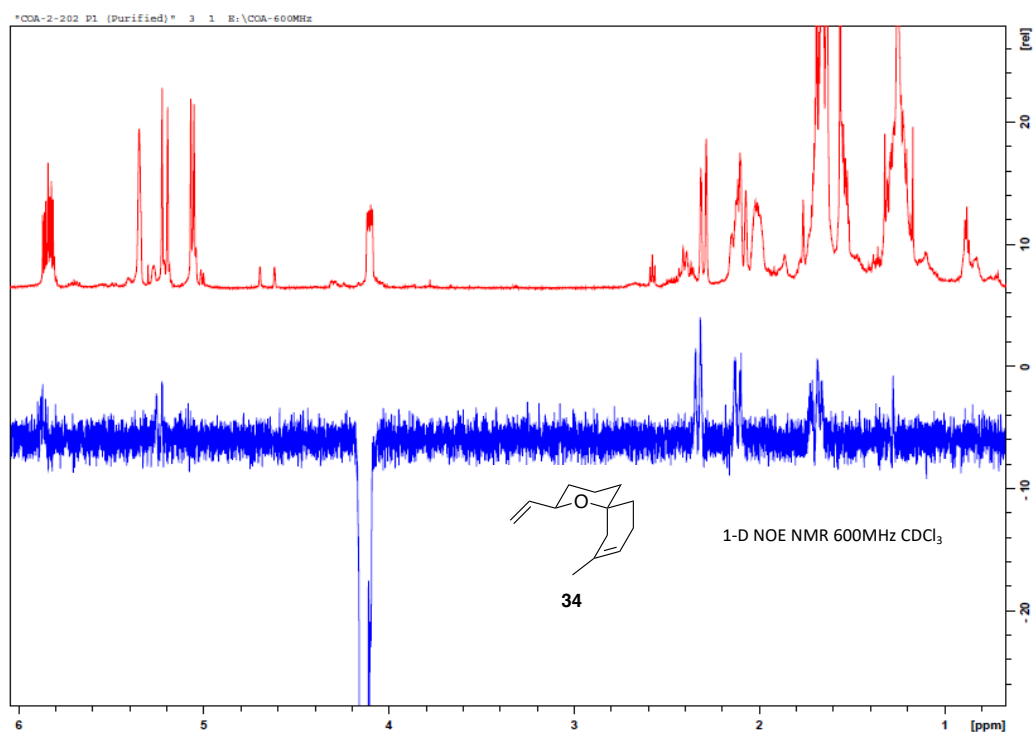

2-083 1H

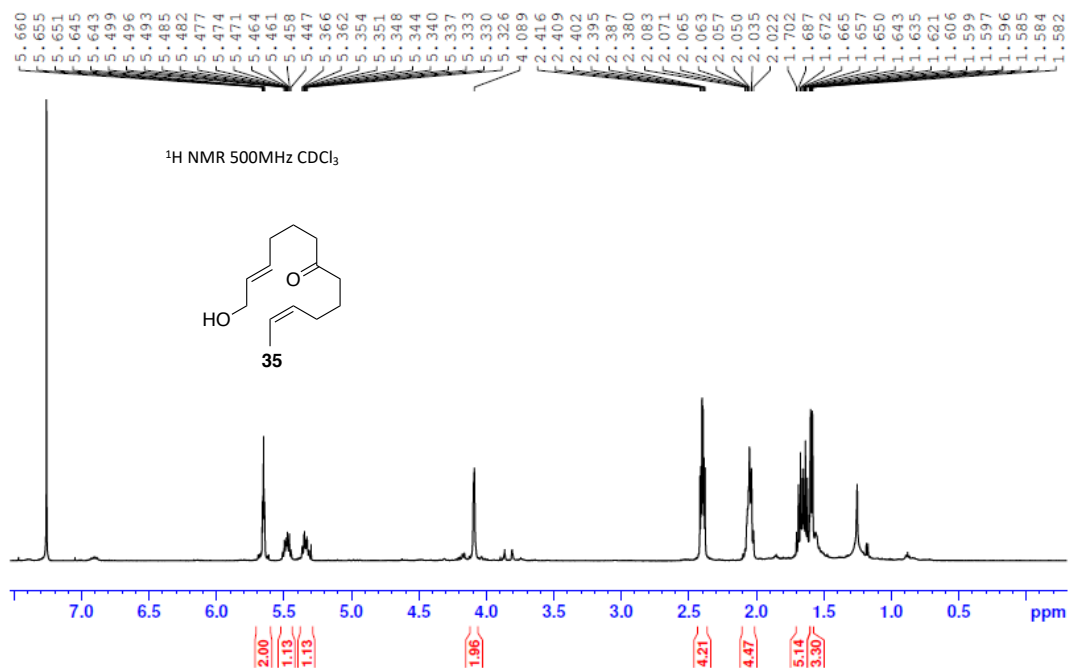

2-083 13C

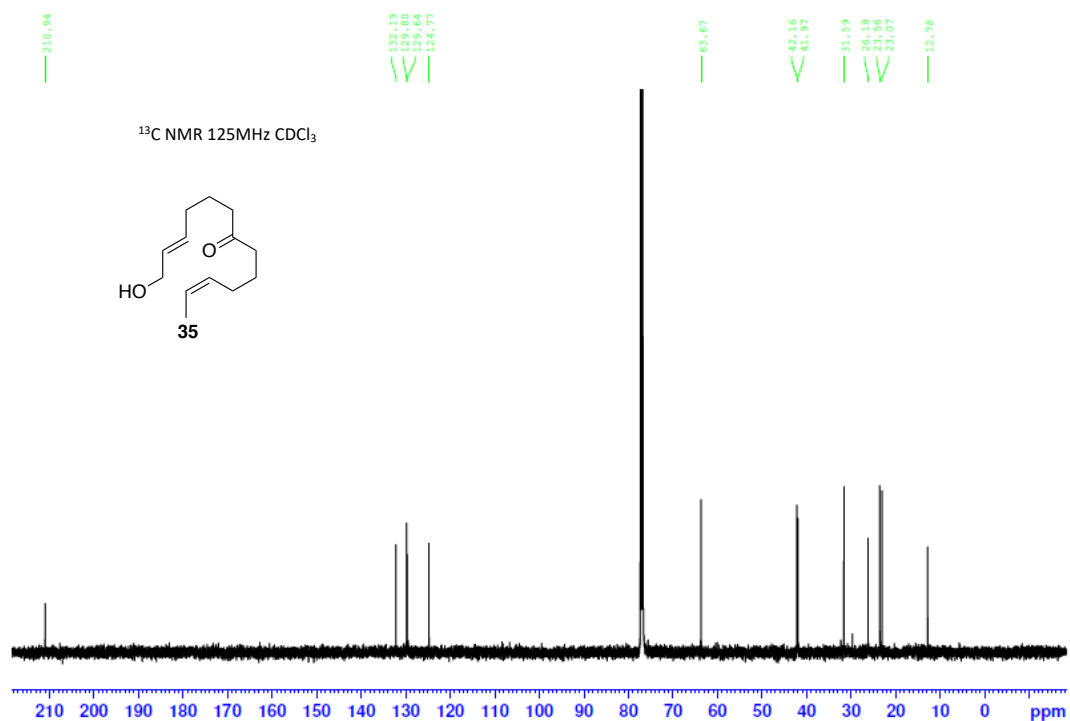

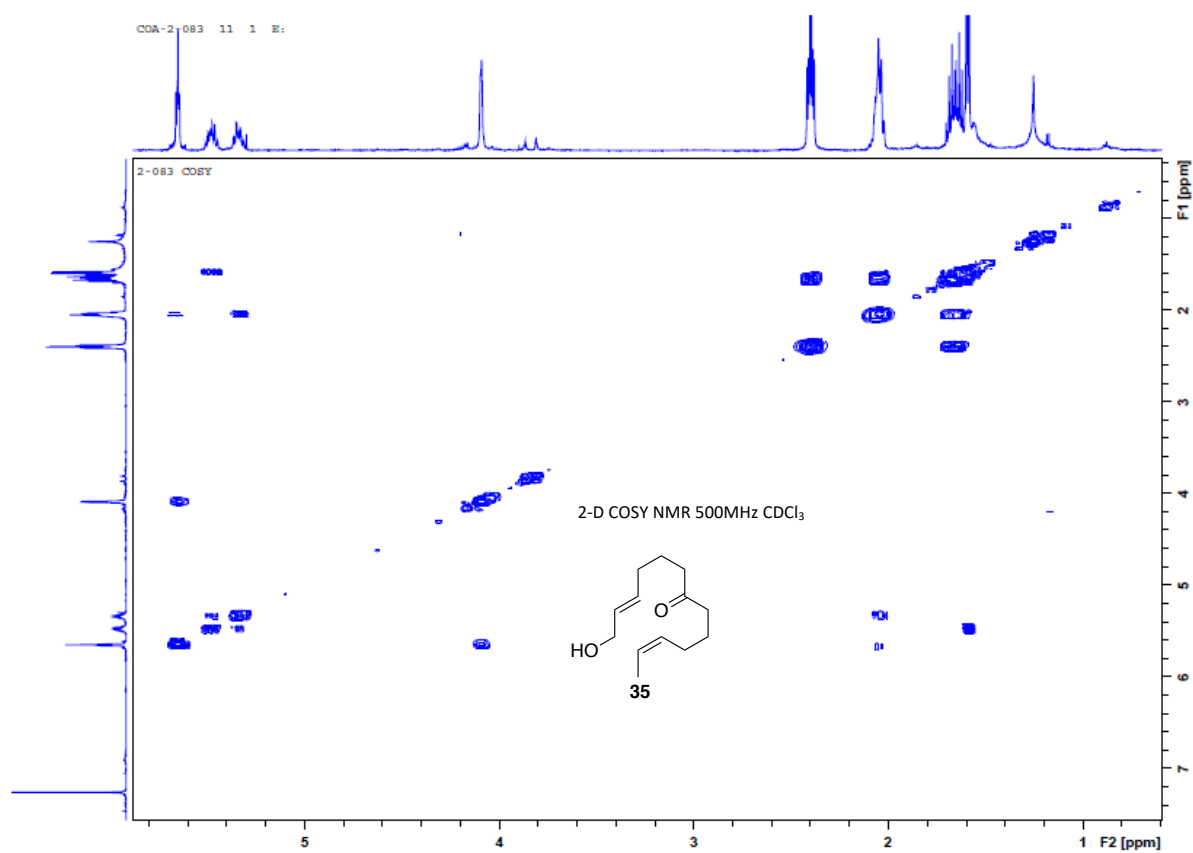

2-084 P2 1H

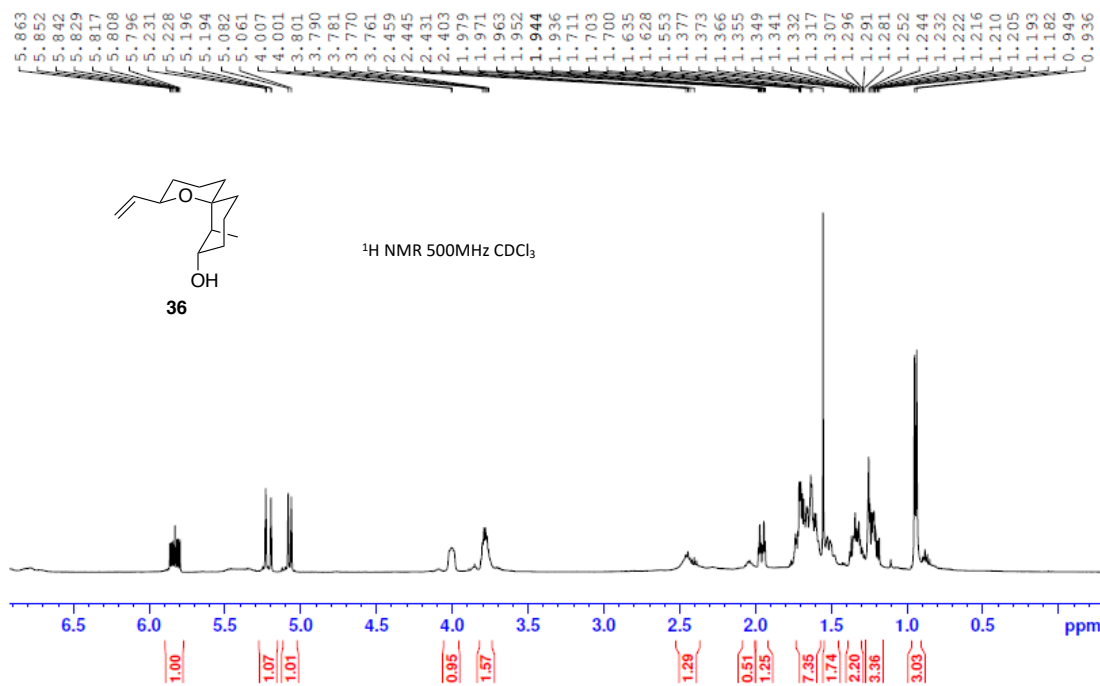

2-084 P2 13C

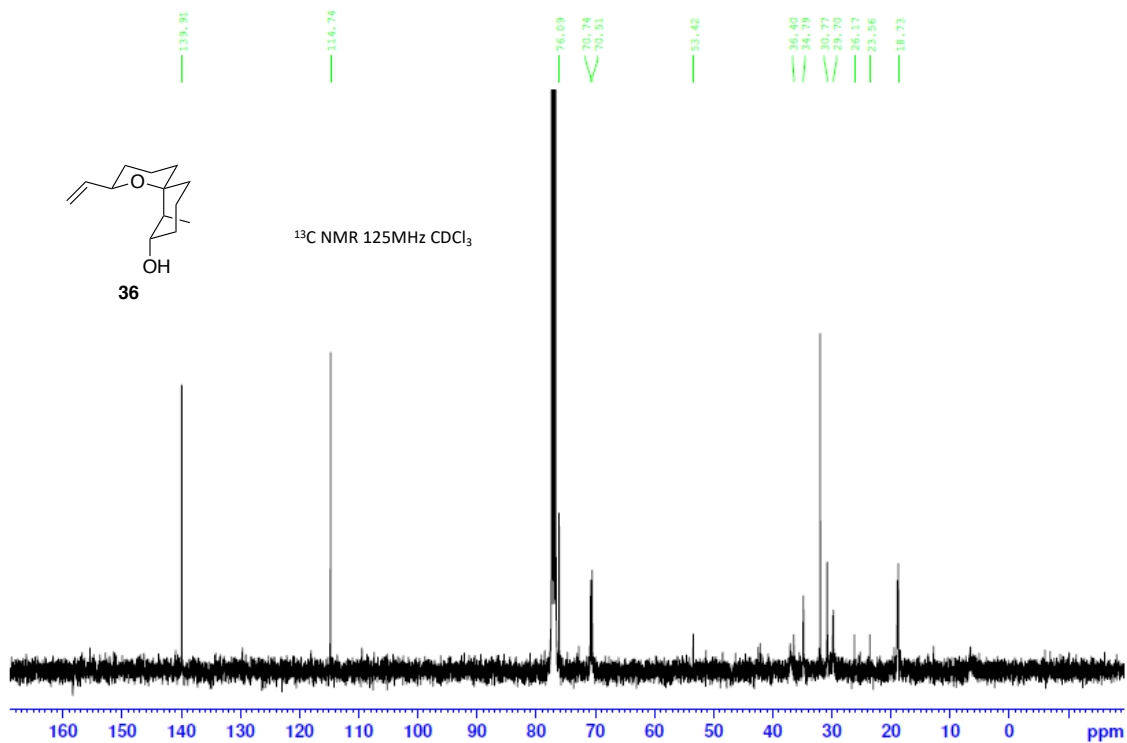



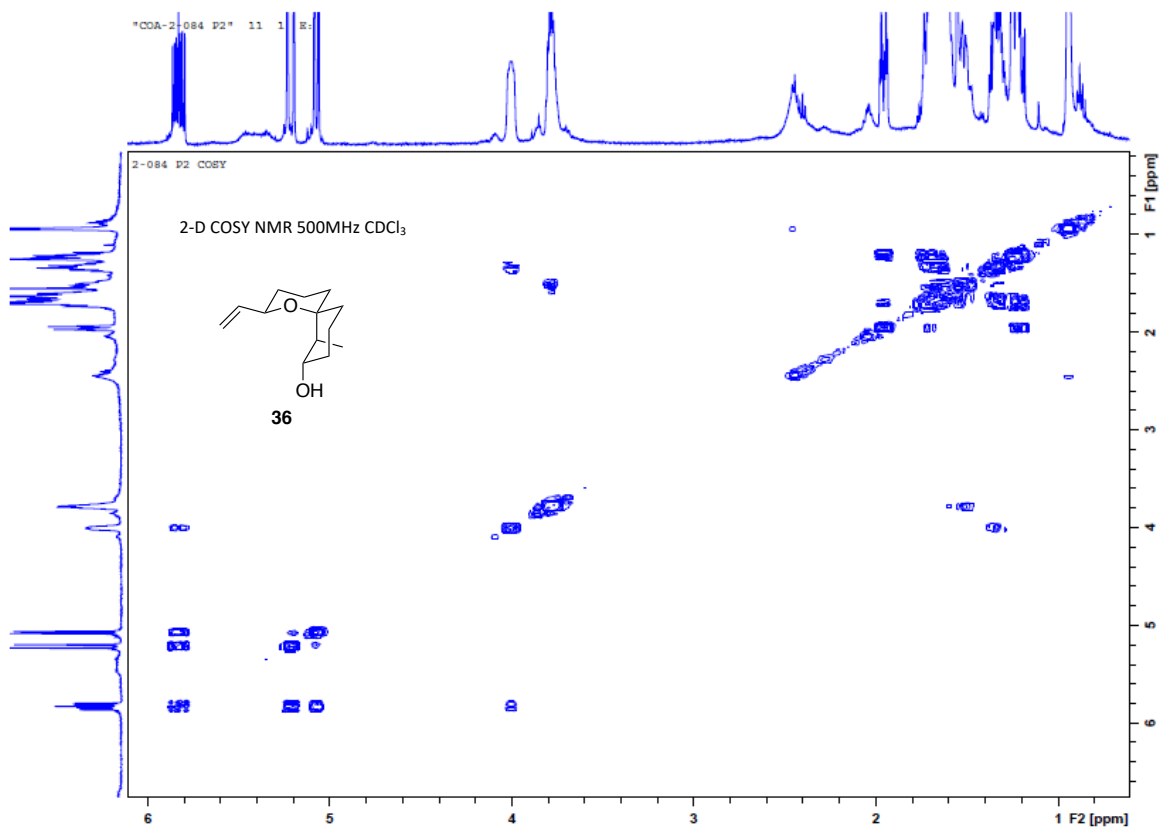

2-084 P1 1H

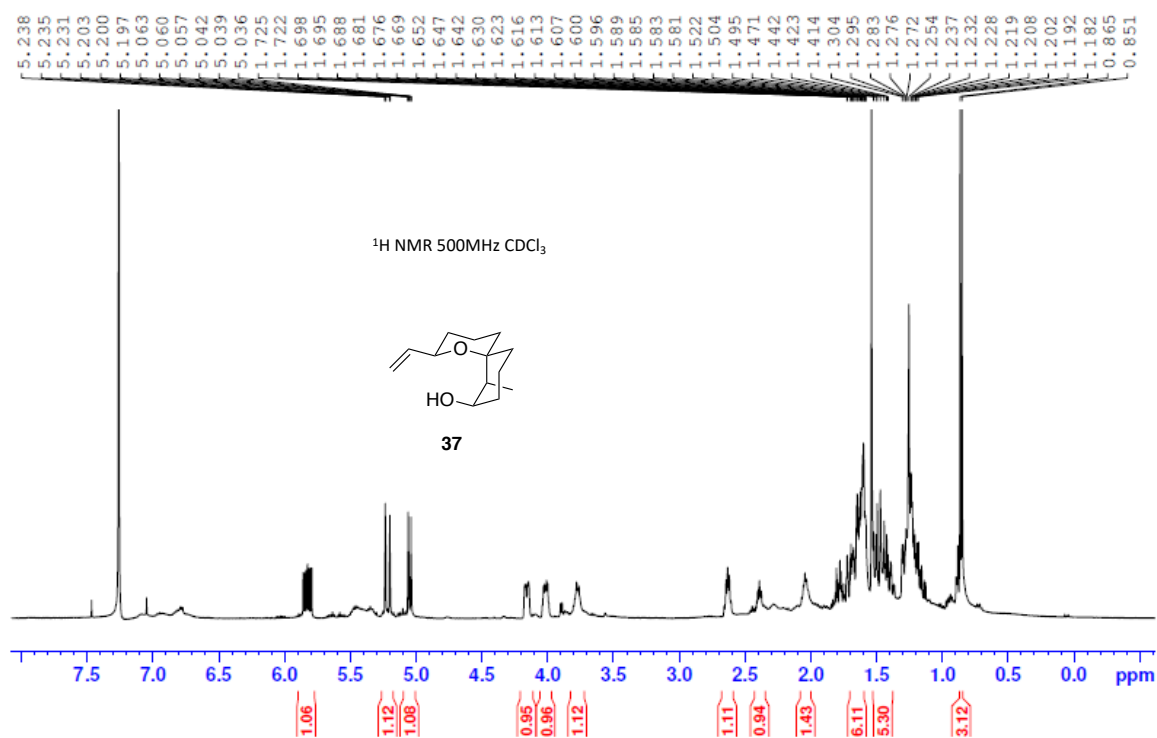

2-084 P1 13C

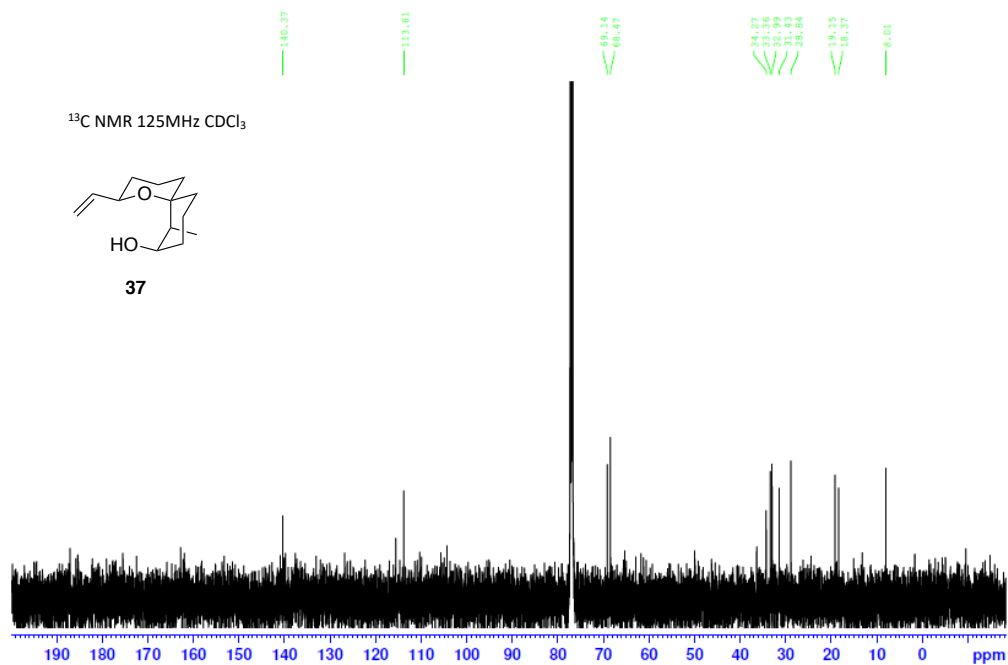

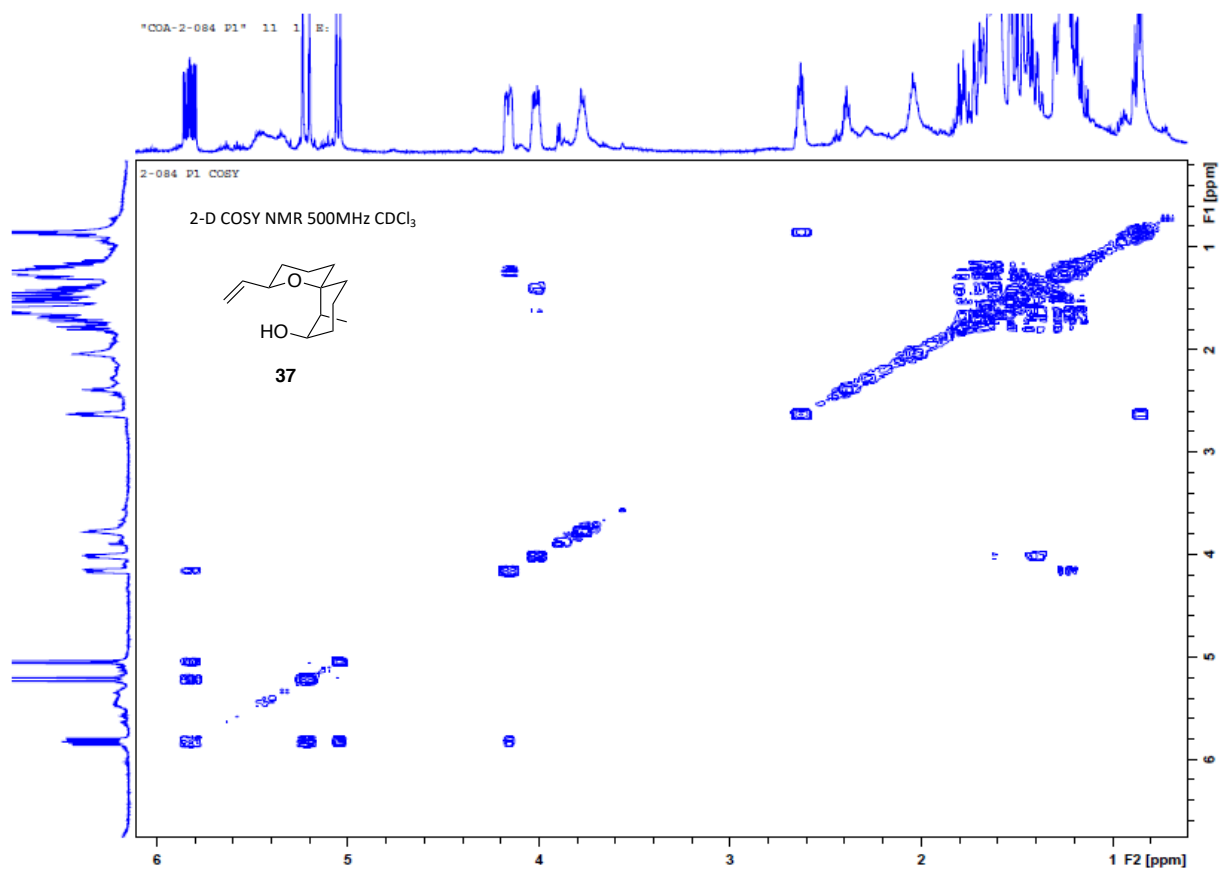

Supplement: Supplementary file 1 [file 15552089]
